# Supplementary material
Source: publisher figshare collection journal article supplement (https://acs.figshare.com/ndownloader/files/31658229)
Supplement: Supplementary file 1 [file 31658229]

*Supporting Information*

**Iridium-Catalyzed Regioselective Hydroalkynylation of Internal Alkenes Directed by an Oxime**

Peng-Chao Gao, Zi-Xuan Wang, Bi-Jie Li\*

Center of Basic Molecular Science (CBMS), Department of Chemistry, Tsinghua University

**Table of Contents**

|                                                            |     |
|------------------------------------------------------------|-----|
| Materials and methods .....                                | S1  |
| Synthesis and characterization of starting materials ..... | S2  |
| General procedure .....                                    | S2  |
| General procedure for Ir-catalyzed hydroalkynylation ..... | S13 |
| Characterization of products .....                         | S13 |
| Synthetic transformation of product .....                  | S25 |
| Ee determination of <b>3a</b> and <b>3d</b> .....          | S27 |
| References .....                                           | S29 |
| Copy of NMR spectra .....                                  | S30 |

## Materials and methods

Unless otherwise noted, all reactions were assembled on a Schlenk vacuum line or in an Ar filled glovebox using oven-dried glassware and were stirred with Teflon-coated magnetic stirring bars. All ligands were purchased from Strem Chemicals and were used as received.  $[\text{Ir}(\text{COD})_2\text{OTf}]$  was prepared according to literature methods.<sup>1</sup> Triisopropylsilylacetylene was purchased from Alfa Aesar and was used as received. All solvents and reagents were used as received. All work-up and purification procedures were carried out with reagent grade solvents with Schlenk techniques unless otherwise specified. Reaction temperatures above 23 °C refer to temperatures of a silicon oil bath, which were controlled by an electronic temperature modulator from IKA. NMR spectra were acquired on NMR spectrometer with 400 MHz for  $^1\text{H}$  NMR and 101 MHz for  $^{13}\text{C}$  NMR at the NMR facility at Center of Basic Molecular Science (CBMS). Chemical shifts ( $\delta$ ) are reported in ppm relative to the residual solvent signal. Data for  $^1\text{H}$  NMR spectra are reported as follows: chemical shift (multiplicity, coupling constants, number of hydrogens). Abbreviations are as follows: s (singlet), d (doublet), t (triplet), q (quartet), m (multiplet), br (broad). The HRMS analysis was carried out on UHPLC-Q-Exactive mass spectrometry system (Thermo Fisher, USA) consisting of an U3000 series ultra-high performance liquid chromatography system connected to an ion trap detector with an electrospray ionization interface in the positive ion mode. Enantiomeric excess (ee) values were determined by analytical liquid chromatography (HPLC) analysis on a Shimadzu chromatograph (Daicel chiral columns Chiralpak OD-H (4.6 x 250 mm)).

## Synthesis and characterization of starting materials

### General procedure

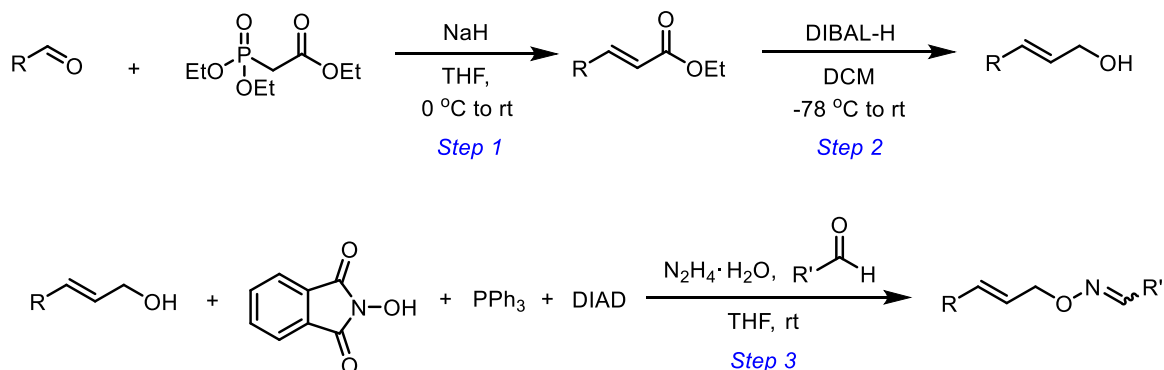

Step 1: To a solution of THF (0.40 M) and NaH (60% dispersion in mineral oil, 1.1 equiv.), triethyl phosphonoacetate (1.1 equiv.) was added dropwise at 0 °C. The reaction was stirred for 30 min, corresponding aldehyde (1.0 equiv.) was added slowly in THF. The reaction was stirred for another 5 minutes before quenched with saturated NH<sub>4</sub>Cl. The mixture was extracted with ethyl acetate. The organic phase was collected and dried with Na<sub>2</sub>SO<sub>4</sub>. The solvent was evaporated, and the residue was purified by silica gel column chromatography with EtOAc/Hexane as eluent to give the α,β-unsaturated ester. *All the yields are not optimized.*

Step 2: To a solution of α,β-unsaturated ester (1.0 equiv.) in dry DCM (0.50 M) was added DIBAL-H (2.1 equiv.) dropwise at -78 °C. The cooling bath was removed and the reaction temperature was slowly warmed to room temperature. The mixture was stirred for 2 h and quenched with water (4.7 equiv.), 15% NaOH (9.4 equiv.) and water (4.7 equiv.) sequentially at 0 °C. The mixture was stirred for another 15 min and filtered through Celite. The solvent was evaporated and the residue was purified by silica gel column chromatography with EtOAc/Hexane as eluent to give the allylic alcohol. *All the yields are not optimized.*

Step 3: A Schlenk flask was charged with THF (0.20 M), 2-hydroxyisoindoline-1,3-dione (1.1 equiv.) and PPh<sub>3</sub> (1.1 equiv.) were added under Ar. Allylic alcohol (1.0 equiv.) was added, followed by DIAD (1.1 equiv.). The reaction was stirred for 30 min and hydrazine hydrate (2.0 equiv.) was added. The mixture was stirred for 15 min and the corresponding

aldehyde (2.0 equiv.) was added. The mixture was stirred overnight. The solvent was removed under reduced pressure. The residue was purified by column chromatography with EtOAc/Hexane as eluent to give the desired oxime product. *All the yields are not optimized.*

### Characterization of starting materials

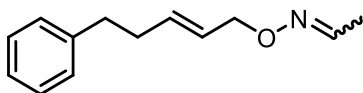

**1a**

The titled compound was prepared according to **General Procedure** in 6.2 mmol scale. Colorless oil. 819 mg, 65% Yield. Spectroscopic data are given as a mixture of *cis* and *trans* isomers (1:1). **<sup>1</sup>H NMR** (400 MHz, Chloroform-*d*)  $\delta$  7.44 (q,  $J$  = 5.9 Hz, 0.5H), 7.30 (m, 2H), 7.19 (m, 3H), 6.77 (q,  $J$  = 5.5 Hz, 0.5H), 5.77 (m, 1H), 5.70 (m, 1H), 4.50 (m, 2H), 2.72 (m, 2H), 2.40 (m, 2H), 1.85 (m, 3H). **<sup>13</sup>C NMR** (101 MHz, Chloroform-*d*)  $\delta$  147.0, 141.9, 141.9, 134.6, 134.1, 128.6, 128.6, 128.4, 126.7, 126.3, 126.0, 74.5, 74.2, 35.6, 35.6, 34.3, 34.3, 15.4, 12.1. **IR**  $\nu$  (cm<sup>-1</sup>) 2921, 2361, 2341, 1020, 970, 669. **HRMS** (ESI-ion trap) calcd for C<sub>13</sub>H<sub>18</sub>NO<sup>+</sup> ([M+H]<sup>+</sup>) 204.1383, found 204.1378

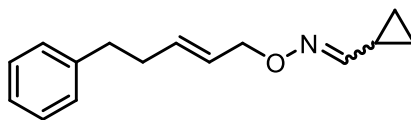

**1b**

The titled compound was prepared according to **General Procedure** in 2.0 mmol scale. Colorless oil. 252 mg, 55% Yield. Spectroscopic data are given as a mixture of *cis* and *trans* isomers (1:1). **<sup>1</sup>H NMR** (400 MHz, Chloroform-*d*)  $\delta$  7.28 (m, 2H), 7.20 (m, 3H), 6.90 (d,  $J$  = 8.5 Hz, 0.5H), 5.95 (d,  $J$  = 8.9 Hz, 0.5H), 5.81 (m, 1H), 5.71 (m, 1H), 4.50 (m, 2H), 2.72 (m, 2H), 2.40 (m, 2H), 2.23 (m, 0.5H), 1.63 (m, 0.6H), 0.90 (m, 2H), 0.61 (m, 2H). **<sup>13</sup>C NMR** (101 MHz, Chloroform-*d*)  $\delta$  154.9, 154.4, 141.9, 141.9, 134.6, 134.1, 128.5, 128.5, 128.4, 126.7, 126.3, 126.0, 125.9, 74.6, 74.3, 35.6, 35.6, 34.3, 11.1, 8.0, 6.3, 5.7. **IR**  $\nu$  (cm<sup>-1</sup>) 2923, 2857, 1732, 1671, 970, 699. **HRMS** (ESI-ion trap) calcd for C<sub>15</sub>H<sub>20</sub>NO<sup>+</sup> ([M+H]<sup>+</sup>) 230.1539, found 230.1532

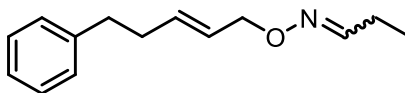

**1c**

The titled compound was prepared according to **General Procedure** in 2.4 mmol scale. Colorless oil. 328 mg, 63% Yield. Spectroscopic data are given as a mixture of *cis* and *trans* isomers (1.2:1). **<sup>1</sup>H NMR** (400 MHz, Chloroform-*d*)  $\delta$  7.41 (t,  $J$  = 5.9 Hz, 0.4H), 7.27 (m, 2H), 7.19 (m, 3H), 6.63 (t,  $J$  = 5.3 Hz, 1H), 5.78 (m, 1H), 5.70 (m, 1H), 4.49 (m, 2H), 2.72 (m, 2H), 2.36 (m, 3H), 2.22 (m, 1H), 1.08 (m, 3H). **<sup>13</sup>C NMR** (101 MHz, Chloroform-*d*)  $\delta$  153.4, 152.2, 141.9, 134.7, 134.0, 128.6, 128.6, 128.5, 128.4, 126.7, 126.2, 126.0, 126.0, 74.6, 74.3, 35.6, 35.6, 34.3, 34.3, 23.2, 19.3, 11.3, 10.8. **IR**  $\nu$  (cm<sup>-1</sup>) 3027, 2971, 2922, 1496, 1454, 970, 699. **HRMS** (ESI-ion trap) calcd for C<sub>14</sub>H<sub>20</sub>NO<sup>+</sup> ([M+H]<sup>+</sup>) 218.1539, found 218.1532

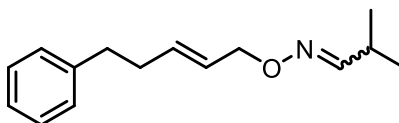

**1d**

The titled compound was prepared according to **General Procedure** in 1.2 mmol scale. Colorless oil. 203 mg, 72% Yield. Spectroscopic data are given as a mixture of *cis* and *trans* isomers (4:1). **<sup>1</sup>H NMR** (400 MHz, Chloroform-*d*)  $\delta$  7.29 (m, 2H), 7.19 (m, 3H), 6.48 (d,  $J$  = 7.2 Hz, 0.2H), 5.79 (m, 1H), 5.68 (m, 1H), 4.48 (m, 2H), 3.13 (m, 0.2H), 2.72 (m, 2H), 2.50 (m, 0.8H), 2.39 (m, 2H), 1.06 (m, 6H). **<sup>13</sup>C NMR** (101 MHz, Chloroform-*d*)  $\delta$  157.5, 156.1, 141.9, 134.7, 133.8, 128.6, 128.5, 128.5, 128.4, 126.8, 126.2, 126.0, 126.0, 74.5, 74.2, 35.6, 35.6, 34.3, 34.3, 29.5, 25.2, 20.3, 19.9. **IR**  $\nu$  (cm<sup>-1</sup>) 2959, 2865, 2361, 2341, 2164, 1496, 1060, 699. **HRMS** (ESI-ion trap) calcd for C<sub>15</sub>H<sub>22</sub>NO<sup>+</sup> ([M+H]<sup>+</sup>) 232.1696, found 232.1689

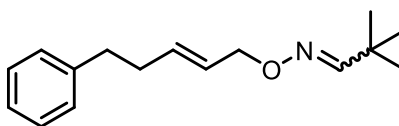

**1e**

The titled compound was prepared according to **General Procedure** in 2.0 mmol scale. Colorless oil. 289 mg, 59% Yield. Spectroscopic data are given as a mixture of *cis* and *trans* isomers (10:1). **<sup>1</sup>H NMR** (400 MHz, Chloroform-*d*)  $\delta$  7.29 (m, 3H), 7.20 (dd, *J* = 6.5, 3.5 Hz, 3H), 5.79 (m, 1H), 5.71 (m, 1H), 4.47 (m, 2H), 2.72 (dd, *J* = 9.3, 6.5 Hz, 2H), 2.39 (d, *J* = 7.8 Hz, 2H), 1.10 (s, 9H). **<sup>13</sup>C NMR** (101 MHz, Chloroform-*d*)  $\delta$  158.5, 141.9, 134.7, 128.5, 128.5, 128.5, 126.2, 126.0, 74.3, 35.6, 34.3, 33.7, 27.8. **IR**  $\nu$  (cm<sup>-1</sup>) 2962, 2929, 2865, 2360, 2341, 1365, 1023, 669. **HRMS** (ESI-ion trap) calcd for C<sub>16</sub>H<sub>24</sub>NO<sup>+</sup> ([M+H]<sup>+</sup>) 246.1852, found 246.1845

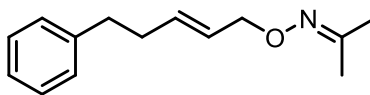

**1f**

The titled compound was prepared according to **General Procedure** in 10 mmol scale. Colorless oil. 1.4 g, 64% Yield. **<sup>1</sup>H NMR** (400 MHz, Chloroform-*d*)  $\delta$  7.28 (m, 2H), 7.19 (m, 3H), 5.77 (m, 1H), 5.70 (m, 1H), 4.48 (d, *J* = 5.9 Hz, 2H), 2.72 (m, 2H), 2.39 (m, 2H), 1.87 (m, 6H). **<sup>13</sup>C NMR** (101 MHz, Chloroform-*d*) 154.9, 142.0, 133.7, 128.6, 128.4, 126.8, 125.9, 74.1, 35.6, 34.3, 22.0, 15.8. **IR**  $\nu$  (cm<sup>-1</sup>) 3062, 3026, 2919, 2855, 1724, 1672, 911, 658. **HRMS** (ESI-ion trap) calcd for C<sub>14</sub>H<sub>20</sub>NO<sup>+</sup> ([M+H]<sup>+</sup>) 218.1539, found 218.1533

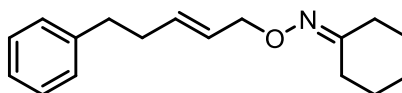

**1g**

The titled compound was prepared according to **General Procedure** in 0.9 mmol scale. Colorless oil. 159 mg, 69% Yield. **<sup>1</sup>H NMR** (400 MHz, Chloroform-*d*)  $\delta$  7.28 (m, 2H), 7.19 (m, 3H), 5.77 (m, 1H), 5.70 (m, 1H), 4.47 (d, *J* = 5.9 Hz, 2H), 2.72 (m, 2H), 2.47 (m, 2H), 2.39 (m, 2H), 2.21 (m, 2H), 1.61 (m, 6H). **<sup>13</sup>C NMR** (101 MHz, Chloroform-*d*)  $\delta$  160.5, 142.0, 133.8, 128.6, 128.4, 126.7, 125.9, 74.0, 35.6, 34.3, 32.4, 27.2, 26.0, 25.9, 25.5. **IR**  $\nu$  (cm<sup>-1</sup>) 2929, 2856, 2360, 2341, 1274, 970, 934. **HRMS** (ESI-ion trap) calcd for C<sub>17</sub>H<sub>24</sub>NO<sup>+</sup> ([M+H]<sup>+</sup>) 258.1852, found 258.1842

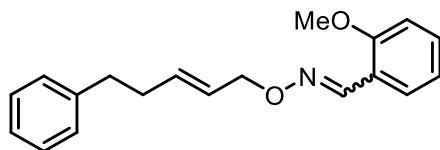

**1h**

The titled compound was prepared according to **General Procedure** in 3.0 mmol scale. Colorless oil. 514 mg, 58% Yield. Spectroscopic data are given as a mixture of *cis* and *trans* isomers (6:1). **<sup>1</sup>H NMR** (400 MHz, Chloroform-*d*)  $\delta$  8.51 (s, 0.86H), 7.80 (m, 1H), 7.34 (m, 1H), 7.28 (m, 2H), 7.20 (m, 3H), 6.95 (m, 1H), 6.89 (m, 1H), 5.85 (m, 1H), 5.78 (m, 1H), 4.63 (d,  $J$  = 6.1 Hz, 2H), 3.84 (s, 3H), 2.74 (m, 2H), 2.42 (m, 2H). **<sup>13</sup>C NMR** (101 MHz, Chloroform-*d*)  $\delta$  157.7, 145.0, 141.9, 134.8, 131.2, 128.6, 128.5, 128.4, 126.6, 126.3, 126.0, 121.1, 120.9, 111.2, 75.0, 55.7, 35.6, 34.4. **IR**  $\nu$  (cm<sup>-1</sup>) 2921, 2838, 2361, 2341, 1605, 1196, 1023, 779. **HRMS** (ESI-ion trap) calcd for C<sub>19</sub>H<sub>22</sub>NO<sub>2</sub><sup>+</sup> ([M+H]<sup>+</sup>) 296.1645, found 296.1635

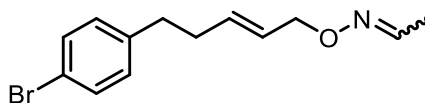

**1i**

The titled compound was prepared according to **General Procedure** in 5.5 mmol scale. Colorless oil. 857 mg, 61% Yield. Spectroscopic data are given as a mixture of *cis* and *trans* isomers (1:1). **<sup>1</sup>H NMR** (400 MHz, Chloroform-*d*)  $\delta$  7.43 (m, 0.5H), 7.39 (m, 2H), 7.05 (m, 2H), 6.76 (q,  $J$  = 5.5 Hz, 0.5H), 5.79 (m, 1H), 5.65 (m, 1H), 4.48 (m, 2H), 2.67 (m, 2H), 2.35 (m, 2H), 1.85 (m, 3H). **<sup>13</sup>C NMR** (101 MHz, Chloroform-*d*)  $\delta$  147.0, 140.8, 140.8, 133.9, 133.4, 131.5, 131.5, 130.4, 130.3, 127.1, 126.7, 119.7, 74.4, 74.1, 34.9, 34.0, 34.0, 15.4, 12.1. **IR**  $\nu$  (cm<sup>-1</sup>) 2920, 2857, 2361, 2341, 1488, 1010, 814. **HRMS** (ESI-ion trap) calcd for C<sub>13</sub>H<sub>17</sub>BrNO<sup>+</sup> ([M+H]<sup>+</sup>) 282.0488, found 282.0482

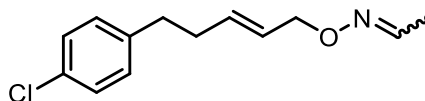

**1j**

The titled compound was prepared according to **General Procedure** in 5.0 mmol scale. Colorless oil. 830 mg, 70% Yield. Spectroscopic data are given as a mixture of *cis* and *trans* isomers (1:1). **<sup>1</sup>H NMR** (400 MHz, Chloroform-*d*)  $\delta$  7.43 (q, *J* = 5.9 Hz, 0.5H), 7.24 (m, 2H), 7.10 (m, 2H), 6.77 (q, *J* = 5.6 Hz, 0.5H), 5.74 (m, 1H), 5.67 (m, 1H), 4.48 (m, 2H), 2.68 (m, 2H), 2.36 (m, 2H), 1.85 (m, 3H). **<sup>13</sup>C NMR** (101 MHz, Chloroform-*d*)  $\delta$  147.1, 140.3, 140.3, 134.0, 133.5, 131.7, 129.9, 129.9, 128.5, 128.5, 127.1, 126.7, 74.4, 74.1, 72.8, 72.5, 34.9, 34.1, 34.1, 31.7, 31.6, 30.8, 30.7, 15.4, 12.1. **IR**  $\nu$  (cm<sup>-1</sup>) 2920, 2858, 2361, 2341, 1492, 1091, 1014, 818. **HRMS** (ESI-ion trap) calcd for C<sub>13</sub>H<sub>17</sub>ClNO<sup>+</sup> ([M+H]<sup>+</sup>) 238.0993, found 238.0984

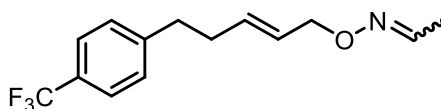

**1k**

The titled compound was prepared according to **General Procedure** in 4.0 mmol scale. Colorless oil. 846 mg, 78% Yield. Spectroscopic data are given as a mixture of *cis* and *trans* isomers (1:1). **<sup>1</sup>H NMR** (400 MHz, Chloroform-*d*)  $\delta$  7.54 (m, 2.5H), 7.28 (m, 2H), 6.76 (q, *J* = 5.3 Hz, 0.5H), 5.75 (m, 1H), 5.69 (m, 1H), 4.49 (m, 2H), 2.77 (m, 2H), 2.40 (m, 2H), 1.84 (t, *J* = 5.7 Hz, 3H). **<sup>13</sup>C NMR** (101 MHz, Chloroform-*d*)  $\delta$  147.1, 145.9, 133.7, 133.5, 133.2, 128.9, 128.9, 127.3, 127.1, 127.0, 125.7, 125.4, 125.3, 125.3, 74.3, 74.1, 35.4, 35.3, 33.9, 33.9, 15.4, 12.1. **IR**  $\nu$  (cm<sup>-1</sup>) 2923, 2859, 2360, 2342, 1619, 1324, 1119, 1067, 1018, 827. **HRMS** (ESI-ion trap) calcd for C<sub>14</sub>H<sub>17</sub>F<sub>3</sub>NO<sup>+</sup> ([M+H]<sup>+</sup>) 272.1257, found 272.1253

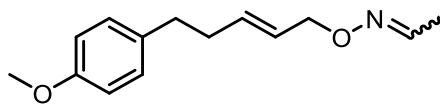

**1l**

The titled compound was prepared according to **General Procedure** in 5.0 mmol scale. Colorless oil. 944 mg, 81% Yield. Spectroscopic data are given as a mixture of *cis* and *trans* isomers (1:1). **<sup>1</sup>H NMR** (400 MHz, Chloroform-*d*)  $\delta$  7.43 (q, *J* = 5.9 Hz, 0.5H), 7.09 (m, 2H), 6.83 (m, 2H), 6.77 (m, 0.5H), 5.77 (m, 1H), 5.69 (m, 1H), 4.52 (m, 2H), 3.79 (s, 3H), 2.66 (m, 2H), 2.35 (m, 2H), 1.85 (m, 3H). **<sup>13</sup>C NMR** (101 MHz, Chloroform-*d*)  $\delta$



157.9, 147.0, 134.7, 134.2, 134.0, 129.4, 126.6, 126.2, 113.9, 74.6, 74.3, 55.4, 34.7, 34.6, 34.6, 15.4, 12.1. **IR**  $\nu$  ( $\text{cm}^{-1}$ ) 2919, 2361, 2341, 1511, 1243, 1020, 824. **HRMS** (ESI-ion trap) calcd for  $\text{C}_{14}\text{H}_{20}\text{NO}_2^+$  ( $[\text{M}+\text{H}]^+$ ) 234.1489, found 234.1479

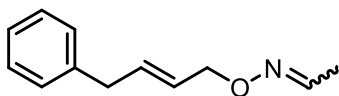

**1m**

The titled compound was prepared according to **General Procedure** in 6.0 mmol scale. Colorless oil. 760 mg, 67% Yield. Spectroscopic data are given as a mixture of *cis* and *trans* isomers (1:1).  **$^1\text{H}$  NMR** (400 MHz, Chloroform-*d*)  $\delta$  7.44 (q,  $J = 5.8$  Hz, 0.5H), 7.30 (m, 2H), 7.20 (m, 3H), 6.78 (m, 0.5H), 5.90 (m, 1H), 5.74 (m, 1H), 4.54 (m, 2H), 3.42 (m, 2H), 1.85 (m, 3H).  **$^{13}\text{C}$  NMR** (101 MHz, Chloroform-*d*)  $\delta$  147.0, 140.1, 140.0, 133.7, 133.2, 131.9, 128.7, 128.6, 128.5, 128.3, 127.6, 127.2, 127.2, 126.7, 126.2, 126.2, 74.3, 74.0, 73.1, 72.8, 38.9, 33.1, 33.0, 15.3, 12.1. **IR**  $\nu$  ( $\text{cm}^{-1}$ ) 3027, 2921, 2360, 1495, 1020, 699 **HRMS** (ESI-ion trap) calcd for  $\text{C}_{12}\text{H}_{16}\text{NO}^+$  ( $[\text{M}+\text{H}]^+$ ) 190.1226, found 190.1221

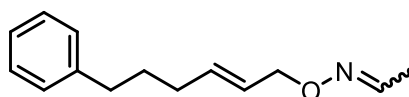

**1n**

The titled compound was prepared according to **General Procedure** in 5.0 mmol scale. Colorless oil. 771 mg, 71% Yield. Spectroscopic data are given as a mixture of *cis* and *trans* isomers (1:1).  **$^1\text{H}$  NMR** (400 MHz, Chloroform-*d*)  $\delta$  7.44 (q,  $J = 5.9$  Hz, 0.5H), 7.29 (m, 2H), 7.19 (m, 3H), 6.77 (q,  $J = 5.6$  Hz, 0.5H), 5.79 (m, 1H), 5.68 (m, 1H), 4.51 (m, 2H), 2.63 (m, 2H), 2.12 (m, 2H), 1.85 (m, 3H), 1.74 (m, 2H).  **$^{13}\text{C}$  NMR** (101 MHz, Chloroform-*d*)  $\delta$  147.0, 147.0, 142.5, 135.2, 134.7, 128.6, 128.5, 128.4, 126.5, 126.1, 125.8, 74.6, 74.3, 35.5, 32.0, 30.8, 30.8, 15.4, 12.1. **IR**  $\nu$  ( $\text{cm}^{-1}$ ) 2922, 2857, 2361, 2341, 1454, 1016, 968, 670. **HRMS** (ESI-ion trap) calcd for  $\text{C}_{14}\text{H}_{20}\text{NO}^+$  ( $[\text{M}+\text{H}]^+$ ) 218.1539, found 218.1534

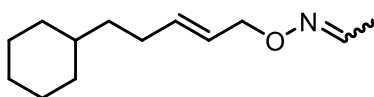

**1o**

The titled compound was prepared according to **General Procedure** in 6.0 mmol scale. Colorless oil. 891 mg, 71% Yield. Spectroscopic data are given as a mixture of *cis* and *trans* isomers (1:1). **<sup>1</sup>H NMR** (400 MHz, Chloroform-*d*)  $\delta$  7.42 (q,  $J$  = 5.7 Hz, 0.5H), 6.76 (q,  $J$  = 5.5 Hz, 0.5H), 5.73 (m, 1H), 5.62 (m, 1H), 4.50 (m, 2H), 2.06 (m, 2H), 1.84 (m, 3H), 1.65 (m, 6H), 1.22 (m, 7H), 0.87 (m, 2H). **<sup>13</sup>C NMR** (101 MHz, Chloroform-*d*)  $\delta$  146.9, 136.3, 135.7, 125.7, 125.3, 74.8, 74.5, 74.4, 74.1, 37.6, 37.3, 37.3, 36.8, 36.8, 33.7, 33.7, 33.5, 33.5, 33.4, 29.8, 26.8, 26.6, 26.5, 26.5, 15.4, 12.1, 12.0. **IR**  $\nu$  (cm<sup>-1</sup>) 2920, 2850, 2361, 2341, 1448, 1022, 971. **HRMS** (ESI-ion trap) calcd for C<sub>13</sub>H<sub>24</sub>NO<sup>+</sup> ([M+H]<sup>+</sup>) 210.1852, found 210.1849

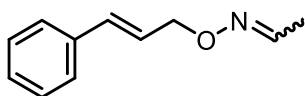

**1p**

The titled compound was prepared according to **General Procedure** in 5.0 mmol scale. Colorless oil. 657 mg, 75% Yield. Spectroscopic data are given as a mixture of *cis* and *trans* isomers (1:1). **<sup>1</sup>H NMR** (400 MHz, Chloroform-*d*)  $\delta$  7.48 (q,  $J$  = 5.8 Hz, 0.5H), 7.40 (m, 2H), 7.32 (m, 2H), 7.23 (m, 1H), 6.81 (q,  $J$  = 5.5 Hz, 0.5H), 6.64 (m, 1H), 6.37 (m, 1H), 4.72 (m, 2H), 1.88 (m, 3H). **<sup>13</sup>C NMR** (101 MHz, Chloroform-*d*)  $\delta$  147.3, 136.8, 133.3, 133.0, 128.7, 127.9, 127.9, 126.7, 125.8, 125.5, 74.5, 74.2, 15.4, 12.1. **IR**  $\nu$  (cm<sup>-1</sup>) 2919, 2855, 2361, 2341, 1436, 1017, 747, 692. **HRMS** (ESI-ion trap) calcd for C<sub>11</sub>H<sub>14</sub>NO<sup>+</sup> ([M+H]<sup>+</sup>) 176.1070, found 176.1068

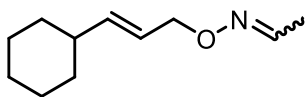

**1q**

The titled compound was prepared according to **General Procedure** in 5.0 mmol scale. Colorless oil. 661 mg, 73% Yield. Spectroscopic data are given as a mixture of *cis* and *trans* isomers (1:1). **<sup>1</sup>H NMR** (400 MHz, Chloroform-*d*)  $\delta$  7.43 (q,  $J$  = 5.9 Hz, 0.5H), 6.78 (q,  $J$  = 5.5 Hz, 0.5H), 5.70 (m, 1H), 5.62 (m, 1H), 4.51 (m, 2H), 2.01 (m, 1H), 1.87 (m, 3H), 1.65 (m, 6H), 1.21 (m, 5H). **<sup>13</sup>C NMR** (101 MHz, Chloroform-*d*)  $\delta$  146.9, 146.9, 141.5, 140.9, 123.4, 122.9, 75.0, 74.7, 40.5, 32.8, 32.8, 26.3, 26.2, 15.4, 12.1. **IR**  $\nu$  (cm<sup>-1</sup>)

2922, 2851, 2360, 2341, 1448, 1022, 970. **HRMS** (ESI-ion trap) calcd for  $C_{11}H_{20}NO^+$  ( $[M+H]^+$ ) 182.1539, found 182.1537

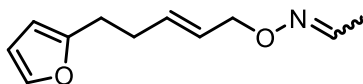

**1r**

The titled compound was prepared according to **General Procedure** in 6.0 mmol scale. Colorless oil. 869 mg, 75% Yield. Spectroscopic data are given as a mixture of *cis* and *trans* isomers (1:1).  **$^1H$  NMR** (400 MHz, Chloroform-*d*)  $\delta$  7.43 (q,  $J = 5.9$  Hz, 0.5H), 7.30 (m, 1H), 6.77 (q,  $J = 5.5$  Hz, 0.5H), 6.27 (m, 1H), 5.99 (m, 1H), 5.76 (m, 1H), 5.71 (m, 1H), 4.50 (m, 2H), 2.73 (m, 2H), 2.42 (m, 2H), 1.85 (m, 3H).  **$^{13}C$  NMR** (101 MHz, Chloroform-*d*)  $\delta$  155.6, 155.6, 147.1, 141.0, 134.0, 133.4, 127.0, 126.6, 110.2, 105.1, 74.4, 74.2, 30.9, 27.7, 27.7, 15.4, 12.1. **IR**  $\nu$  ( $cm^{-1}$ ) 2919, 2854, 2360, 2341, 1508, 1012, 731. **HRMS** (ESI-ion trap) calcd for  $C_{11}H_{16}NO_2^+$  ( $[M+H]^+$ ) 194.1176, found 194.1173

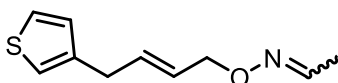

**1s**

The titled compound was prepared according to **General Procedure** in 5.0 mmol scale. Yellow oil. 683 mg, 70% Yield. Spectroscopic data are given as a mixture of *cis* and *trans* isomers (1:1).  **$^1H$  NMR** (400 MHz, Chloroform-*d*)  $\delta$  7.44 (q,  $J = 5.9$  Hz, 0.5H), 7.14 (m, 1H), 6.93 (m, 1H), 6.81 (m, 1H), 6.79 (m, 0.5H), 5.92 (m, 1H), 5.78 (m, 1H), 4.59 (m, 1H), 4.50 (m, 1H), 3.59 (m, 2H), 1.85 (m, 3H).  **$^{13}C$  NMR** (101 MHz, Chloroform-*d*)  $\delta$  147.1, 143.0, 142.9, 132.6, 132.1, 128.0, 127.7, 127.3, 127.0, 126.7, 125.1, 124.8, 123.8, 123.5, 74.0, 73.7, 32.9, 15.3, 12.1. **IR**  $\nu$  ( $cm^{-1}$ ) 2919, 2865, 2360, 2341, 1436, 1368, 1012, 968, 695. **HRMS** (ESI-ion trap) calcd for  $C_{10}H_{14}NOS^+$  ( $[M+H]^+$ ) 196.0791, found 196.0790

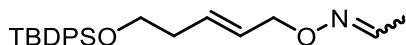

**1t**

The titled compound was prepared according to **General Procedure** in 1.9 mmol scale. Colorless oil. 572 mg, 77% Yield. Spectroscopic data are given as a mixture of *cis* and *trans* isomers (1:1).  **$^1H$  NMR** (400 MHz, Chloroform-*d*)  $\delta$  7.66 (m, 4H), 7.38 (m, 6H), 6.76

(q,  $J = 5.5$  Hz, 0.5H), 5.71 (m, 2H), 4.49 (m, 2H), 3.71 (m, 2H), 2.33 (m, 2H), 1.84 (m, 3H), 1.05 (s, 9H).  $^{13}\text{C}$  NMR (101 MHz, Chloroform- $d$ )  $\delta$  147.0, 135.7, 134.1, 131.8, 131.3, 129.7, 128.1, 127.7, 74.6, 74.3, 63.5, 35.9, 27.0, 19.4, 15.4, 12.1. IR  $\nu$  ( $\text{cm}^{-1}$ ) 2930, 2858, 2360, 2341, 1428, 1109, 688. HRMS (ESI-ion trap) calcd for  $\text{C}_{23}\text{H}_{32}\text{NO}_2\text{Si}^+$  ( $[\text{M}+\text{H}]^+$ ) 382.2197, found 382.2184

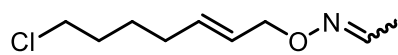

**1u**

The titled compound was prepared according to **General Procedure** in 2.0 mmol scale. Colorless oil. 250 mg, 60% Yield. Spectroscopic data are given as a mixture of *cis* and *trans* isomers (1:1).  $^1\text{H}$  NMR (400 MHz, Chloroform- $d$ )  $\delta$  7.43 (q,  $J = 5.8$  Hz, 0.5H) 6.77 (q,  $J = 5.5$  Hz, 0.5H), 5.68 (m, 2H), 4.52 (d,  $J = 5.7$  Hz, 1H), 4.46 (d,  $J = 6.0$  Hz, 1H), 3.53 (m, 2H), 2.10 (m, 2H), 1.85 (m, 3H), 1.80 (m, 2H), 1.55 (m, 2H).  $^{13}\text{C}$  NMR (101 MHz, Chloroform- $d$ )  $\delta$  147.0, 134.7, 134.2, 126.7, 126.4, 74.5, 74.2, 45.0, 32.2, 31.7, 26.3, 26.3, 15.4, 12.1. IR  $\nu$  ( $\text{cm}^{-1}$ ) 2923, 2861, 2360, 2341, 1672, 1637, 1021, 971. HRMS (ESI-ion trap) calcd for  $\text{C}_9\text{H}_{17}\text{ClNO}^+$  ( $[\text{M}+\text{H}]^+$ ) 190.0993, found 190.0986

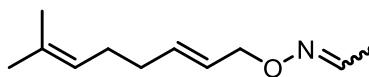

**1v**

The titled compound was prepared according to **General Procedure** in 2.1 mmol scale. Colorless oil. 276 mg, 65% Yield. Spectroscopic data are given as a mixture of *cis* and *trans* isomers (1:1).  $^1\text{H}$  NMR (400 MHz, Chloroform- $d$ )  $\delta$  7.43 (q,  $J = 5.9$  Hz, 0.5H), 6.76 (q,  $J = 5.5$  Hz, 0.5H), 5.74 (m, 1H), 5.65 (m, 1H), 5.11 (m, 1H), 4.49 (m, 2H), 2.08 (m, 4H), 1.84 (m, 3H), 1.68 (s, 3H), 1.60 (s, 3H).  $^{13}\text{C}$  NMR (101 MHz, Chloroform- $d$ )  $\delta$  146.9, 135.4, 134.9, 132.0, 132.0, 126.1, 125.7, 123.9, 123.9, 74.7, 74.4, 32.7, 32.7, 27.7, 27.7, 25.8, 17.9, 15.4, 12.1. IR  $\nu$  ( $\text{cm}^{-1}$ ) 2918, 2360, 2341, 1438, 1376, 1019, 969. HRMS (ESI-ion trap) calcd for  $\text{C}_{11}\text{H}_{20}\text{NO}^+$  ( $[\text{M}+\text{H}]^+$ ) 182.1539, found 182.1534

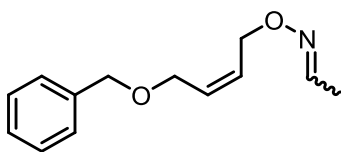

**(Z)-1w**

The titled compound was prepared according to **General Procedure** in 5.0 mmol scale. Colorless oil. 646 mg, 59% Yield. Spectroscopic data are given as a mixture of *cis* and *trans* isomers (1.2:1). **<sup>1</sup>H NMR** (400 MHz, Chloroform-*d*)  $\delta$  7.42 (q,  $J$  = 5.9 Hz, 0.6H), 7.34 (m, 5H), 6.77 (q,  $J$  = 5.5 Hz, 0.4H), 5.81 (m, 2H), 4.61 (m, 2H), 4.52 (m, 2H), 4.14 (m, 2H), 1.84 (t,  $J$  = 5.4 Hz, 3H). **<sup>13</sup>C NMR** (101 MHz, Chloroform-*d*)  $\delta$  147.3, 138.3, 130.1, 129.8, 129.0, 128.7, 128.5, 127.9, 127.8, 72.4, 72.4, 69.5, 69.1, 66.0, 66.0, 15.4, 12.0. **IR**  $\nu$  (cm<sup>-1</sup>) 2921, 2856, 2360, 2341, 1739, 1454, 1027. **HRMS** (ESI-ion trap) calcd for C<sub>13</sub>H<sub>18</sub>NO<sub>2</sub><sup>+</sup> ([M+H]<sup>+</sup>) 220.1332, found 220.1326

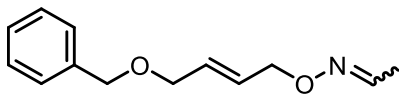

**(E)-1w**

The titled compound was prepared according to **General Procedure** in 5.0 mmol scale. Colorless oil. 762 mg, 70% Yield. Spectroscopic data are given as a mixture of *cis* and *trans* isomers (1.2:1) **<sup>1</sup>H NMR** (400 MHz, Chloroform-*d*)  $\delta$  7.45 (m, 0.4H), 7.32 (m, 5H), 6.78 (q,  $J$  = 5.5 Hz, 0.6H), 5.90 (m, 2H), 4.61 (d,  $J$  = 5.3 Hz, 1H), 4.54 (m, 3H), 4.06 (m, 2H), 1.85 (m, 3H). **<sup>13</sup>C NMR** (101 MHz, Chloroform-*d*)  $\delta$  147.2, 147.2, 138.4, 130.2, 129.7, 129.3, 129.0, 128.5, 127.9, 127.9, 127.7, 73.7, 73.4, 72.3, 72.3, 70.2, 70.2, 15.3, 12.0. **IR**  $\nu$  (cm<sup>-1</sup>) 2852, 1737, 1364, 736, 679. **HRMS** (ESI-ion trap) calcd for C<sub>13</sub>H<sub>18</sub>NO<sub>2</sub><sup>+</sup> ([M+H]<sup>+</sup>) 220.1332, found 220.1326

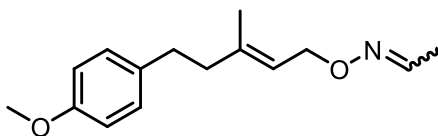

**1x**

The titled compound was prepared according to **General Procedure** in 10 mmol scale. Colorless oil. 1.6 g, 66% Yield. Spectroscopic data are given as a mixture of *cis* and *trans* isomers (1.2:1). **<sup>1</sup>H NMR** (400 MHz, Chloroform-*d*)  $\delta$  7.43 (q,  $J$  = 5.9 Hz, 0.4H), 7.10 (m, 2H), 6.82 (m, 2H), 6.77 (q,  $J$  = 5.6 Hz, 0.6H), 5.44 (m, 1H), 4.56 (m, 2H), 3.79 (s, 3H), 2.69 (m, 2H), 2.32 (m, 2H), 1.85 (m, 3H), 1.75 (s, 3H). **<sup>13</sup>C NMR** (101 MHz, Chloroform-

*d*)  $\delta$  157.9, 146.9, 146.9, 146.8, 141.0, 140.2, 134.3, 134.1, 129.4, 129.4, 129.3, 121.7, 121.2, 120.7, 120.1, 113.9, 113.9, 70.5, 70.1, 70.1, 69.7, 55.4, 41.9, 41.9, 34.8, 34.7, 33.8, 33.8, 33.6, 23.8, 16.9, 16.9, 15.4, 12.1. **IR**  $\nu$  (cm<sup>-1</sup>) 2921, 2361, 2341, 1511, 1244, 1035, 823. **HRMS** (ESI-ion trap) calcd for C<sub>15</sub>H<sub>22</sub>NO<sub>2</sub><sup>+</sup> ([M+H]<sup>+</sup>) 248.1645, found 248.1637

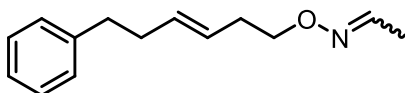

**1y**

The titled compound was prepared according to **General Procedure** in 2.8 mmol scale. Colorless oil. 456 mg, 74% Yield. Spectroscopic data are given as a mixture of *cis* and *trans* isomers (1:1). **<sup>1</sup>H NMR** (400 MHz, Chloroform-*d*)  $\delta$  7.41 (q, *J* = 5.8 Hz, 0.5H), 7.29 (m, 2H), 7.17 (m, 3H), 6.75 (q, *J* = 5.5 Hz, 1H), 5.55 (m, 1H), 5.46 (m, 1H), 4.03 (m, 2H), 2.68 (m, 2H), 2.33 (m, 4H), 1.84 (m, 3H). **<sup>13</sup>C NMR** (101 MHz, Chloroform-*d*)  $\delta$  147.0, 147.0, 142.5, 135.2, 134.7, 128.6, 128.5, 128.4, 126.5, 126.1, 125.8, 74.6, 74.3, 35.5, 32.0, 30.8, 30.8, 15.4, 12.1. **IR**  $\nu$  (cm<sup>-1</sup>) 2923, 2361, 2341, 1474, 1044, 669. **HRMS** (ESI-ion trap) calcd for C<sub>14</sub>H<sub>20</sub>NO<sup>+</sup> ([M+H]<sup>+</sup>) 218.1539, found 218.1534

### General procedure for Ir-catalyzed hydroalkynylation

In an Ar-filled glovebox, Ir(COD)<sub>2</sub>OTf (5.6 mg, 10 mol%), Ph-BPE (6.1 mg, 12 mol%) and unsaturated oxime (0.10 mmol) were weighed into a Schlenk tube. Then 0.40 mL DCE and triisopropylsilylacetylene (55 mg, 0.30 mmol) were added via syringes. The vial was capped with a Teflon-lined screw cap and removed from the glovebox. Subsequently the vial was put in a preheated oil bath (60 °C). After 24h, the vial was cool to room temperature, and the reaction mixture was purified by column chromatography with ethyl acetate/hexanes as eluent.

### Characterization of products

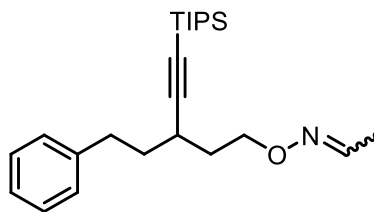

**3a**

Following the **general procedure**, oxime **1a** (20.3 mg, 0.100 mmol) was converted to the alkynylation product. Purification by column chromatography with EtOAc/Hexane as eluent gave the product **3a** (31.6 mg, 82% yield) as a light-yellow oil.

Following the **general procedure**, oxime **1a** (203 mg, 1.00 mmol) was converted to the alkynylation product. Purification by column chromatography with EtOAc/Hexane as eluent gave the product **3a** (346 mg, 90% yield) as a light-yellow oil.

Spectroscopic data are given as a mixture of *cis* and *trans* isomers (1:1). **<sup>1</sup>H NMR** (400 MHz, Chloroform-*d*)  $\delta$  7.39 (q, *J* = 5.8 Hz, 0.5H), 7.29 (m, 2H), 7.21 (m, 3H), 6.74 (q, *J* = 5.5 Hz, 0.5H), 4.22 (m, 2H), 2.90 (m, 1H), 2.78 (m, 1H), 2.56 (m, 1H), 1.82 (m, 7H), 1.11 (m, 21H). **<sup>13</sup>C NMR** (101 MHz, Chloroform-*d*)  $\delta$  146.8, 146.7, 142.3, 142.2, 128.7, 128.5, 128.5, 125.9, 111.3, 111.3, 82.2, 82.2, 71.7, 71.5, 37.5, 37.4, 34.7, 33.8, 33.7, 29.3, 29.2, 18.8, 15.3, 11.9, 11.4. **IR**  $\nu$  (cm<sup>-1</sup>) 2941, 2864, 2360, 2341, 2164, 1461, 862, 675. **HRMS** (ESI-ion trap) calcd for C<sub>24</sub>H<sub>40</sub>NOSi<sup>+</sup> ([M+H]<sup>+</sup>) 386.2874, found 386.2861

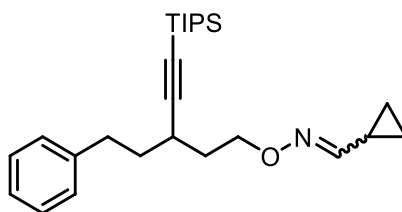

**3b**

Following the **general procedure**, oxime with **1b** (22.9 mg, 0.100 mmol) was converted to the alkynylation product. Purification by column chromatography with EtOAc/Hexane as eluent gave the product **3b** (15.6 mg, 38% yield) as a colorless oil. Spectroscopic data are given as a mixture of *cis* and *trans* isomers (1:1). **<sup>1</sup>H NMR** (400 MHz, Chloroform-*d*)  $\delta$  7.28 (m, 2H), 7.20 (m, 3H), 6.85 (d, *J* = 8.4 Hz, 1H), 4.17 (m, 2H), 2.88 (m, 1H), 2.76

(m, 1H), 2.54 (m, 1H), 1.86 (m, 1H), 1.76 (m, 3H), 1.59 (m, 1H), 1.07 (m, 21H), 0.85 (m, 2H), 0.59 (m, 2H). **<sup>13</sup>C NMR** (101 MHz, Chloroform-*d*)  $\delta$  154.1, 142.3, 128.7, 128.5, 125.9, 111.3, 82.2, 71.5, 37.5, 34.7, 33.8, 29.3, 18.9, 11.4, 11.1, 5.7, 5.7. **IR**  $\nu$  (cm<sup>-1</sup>) 2941, 2864, 2360, 2341, 1382, 1058, 883. **HRMS** (ESI-ion trap) calcd for C<sub>26</sub>H<sub>42</sub>NOSi<sup>+</sup> ([M+H]<sup>+</sup>) 412.3030, found 412.3013

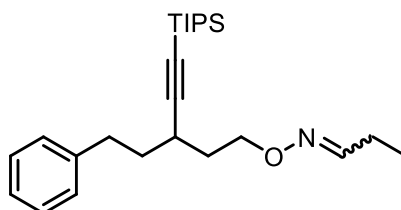

**3c**

Following the **general procedure**, oxime **1c** (21.7 mg, 0.100 mmol) was converted to the alkynylation product. Purification by column chromatography with EtOAc/Hexane as eluent gave the product **3c** (23.5 mg, 59% yield) as a colorless oil. Spectroscopic data are given as a mixture of *cis* and *trans* isomers (1.2:1). **<sup>1</sup>H NMR** (400 MHz, Chloroform-*d*)  $\delta$  7.36 (t, *J* = 6.0 Hz, 0.6H), 7.28 (m, 2H), 7.20 (m, 3H), 6.60 (t, *J* = 5.3 Hz, 0.4H), 4.20 (m, 2H), 2.89 (m, 1H), 2.77 (m, 1H), 2.55 (m, 1H), 2.29 (m, 2H), 1.87 (m, 1H), 1.78 (m, 2H), 1.08 (m, 24H). **<sup>13</sup>C NMR** (101 MHz, Chloroform-*d*)  $\delta$  153.2, 151.9, 142.3, 142.3, 128.7, 128.6, 128.5, 128.5, 125.9, 111.3, 111.3, 82.2, 71.8, 71.5, 37.5, 37.4, 34.7, 33.8, 33.8, 29.3, 29.2, 23.2, 19.3, 18.8, 11.4, 11.3, 10.8. **IR**  $\nu$  (cm<sup>-1</sup>) 2941, 2865, 2361, 2341, 2164, 1459, 1059, 883. **HRMS** (ESI-ion trap) calcd for C<sub>25</sub>H<sub>42</sub>NOSi<sup>+</sup> ([M+H]<sup>+</sup>) 400.3030, found 400.3017

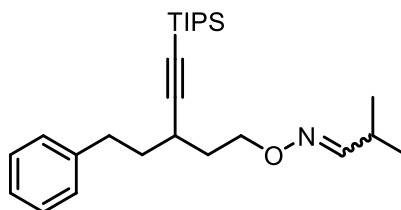

**3d**

Following the **general procedure**, oxime **1d** (23.1 mg, 0.100 mmol) was converted to the alkynylation product. Purification by column chromatography with EtOAc/Hexane as eluent gave the product **3d** (19.8 mg, 48% yield) as a colorless oil. Spectroscopic data are



given as a mixture of *cis* and *trans* isomers (4:1). **<sup>1</sup>H NMR** (400 MHz, Chloroform-*d*)  $\delta$  7.26 (m, 2H), 7.20 (m, 3H), 6.43 (d,  $J$  = 7.2 Hz, 0.2H), 4.18 (m, 2H), 2.91 (m, 0.2H), 2.89 (m, 1H), 2.76 (m, 1H), 2.49 (m, 2H), 1.80 (m, 4H), 1.08 (m, 28H). **<sup>13</sup>C NMR** (101 MHz, Chloroform-*d*)  $\delta$  157.4, 155.8, 142.3, 128.7, 128.5, 125.9, 111.3, 82.2, 71.7, 71.4, 37.5, 37.4, 34.7, 33.8, 33.8, 29.5, 29.3, 29.2, 25.2, 20.3, 20.2, 19.9, 18.8, 11.5. **IR**  $\nu$  (cm<sup>-1</sup>) 2959, 2865, 2361, 2341, 2164, 1496, 1060, 883, 676. **HRMS** (ESI-ion trap) calcd for C<sub>26</sub>H<sub>44</sub>NOSi<sup>+</sup> ([M+H]<sup>+</sup>) 414.3187, found 414.3176

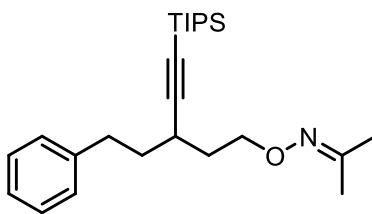

**3f**

Following the **general procedure**, oxime **1f** (43.4 mg, 0.200 mmol) was converted to the alkynylation product. Purification by column chromatography with EtOAc/Hexane as eluent gave the product **3f** (8.40 mg, 10% yield) as a colorless oil. **<sup>1</sup>H NMR** (400 MHz, Chloroform-*d*)  $\delta$  7.28 (d,  $J$  = 7.5 Hz, 2H), 7.25 (m, 3H), 4.17 (m, 2H), 2.88 (m, 1H), 2.76 (m, 1H), 2.54 (m, 1H), 1.82 (m, 10H), 1.09 (m, 21H). **<sup>13</sup>C NMR** (101 MHz, Chloroform-*d*)  $\delta$  154.7, 142.3, 128.7, 128.5, 125.9, 111.5, 82.1, 71.2, 37.4, 34.8, 33.8, 29.3, 22.0, 18.8, 15.7, 11.5. **IR**  $\nu$  (cm<sup>-1</sup>) 2942, 2864, 2360, 2341, 1558, 1070, 919. **HRMS** (ESI-ion trap) calcd for C<sub>25</sub>H<sub>42</sub>NOSi<sup>+</sup> ([M+H]<sup>+</sup>) 400.3030, found 400.3014

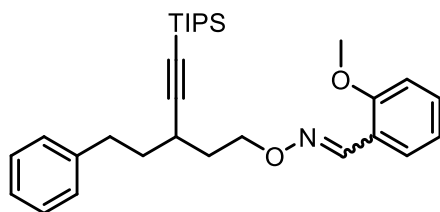

**3h**

Following the **general procedure**, oxime **1h** (29.5 mg, 0.100 mmol) was converted to the alkynylation product. Purification by column chromatography with EtOAc/Hexane as eluent gave the product **3h** (14.8 mg, 31% yield) as a colorless oil. Spectroscopic data are given as a mixture of *cis* and *trans* isomers (4:1). **<sup>1</sup>H NMR** (400 MHz, Chloroform-*d*)  $\delta$

7.28 (m, 2H), 7.20 (m, 3H), 6.85 (m, 2H), 4.17 (m, 2H), 3.84 (m, 3H), 2.91 (m, 1H), 2.75 (m, 1H), 2.54 (m, 1H), 1.85 (m, 4H), 1.76 (m, 1H), 1.11 (m, 21H), 0.84 (m, 2H), 0.59 (m, 2H).  $^{13}\text{C}$  NMR (101 MHz, Chloroform-*d*)  $\delta$  157.6, 144.7, 142.3, 131.1, 128.7, 128.5, 126.5, 125.9, 121.2, 120.9, 111.4, 111.2, 82.3, 72.2, 55.7, 37.5, 34.9, 33.8, 29.4, 19.0, 18.9, 11.5. IR  $\nu$  ( $\text{cm}^{-1}$ ) 2940, 2863, 2361, 2341, 2164, 1464, 1251, 752. HRMS (ESI-ion trap) calcd for  $\text{C}_{30}\text{H}_{44}\text{NO}_2\text{Si}^+$  ( $[\text{M}+\text{H}]^+$ ) 478.3136, found 478.3120

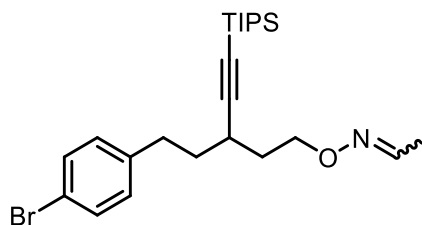

**3i**

Following the **general procedure**, oxime **1i** (28.1 mg, 0.100 mmol) was converted to the alkynylation product. Purification by column chromatography with EtOAc/Hexane as eluent gave the product **3i** (39.4 mg, 85% yield) as a colorless oil. Spectroscopic data are given as a mixture of *cis* and *trans* isomers (1:1).  $^1\text{H}$  NMR (400 MHz, Chloroform-*d*)  $\delta$  7.39 (m, 2.5H), 7.07 (m, 2H), 6.73 (q,  $J = 5.5$  Hz, 0.5H), 4.17 (m, 2H), 2.85 (m, 1H), 2.73 (m, 1H), 2.51 (m, 1H), 1.81 (m, 6H), 1.09 (s, 21H).  $^{13}\text{C}$  NMR (101 MHz, Chloroform-*d*)  $\delta$  146.9, 146.7, 141.2, 141.1, 131.5, 130.4, 119.7, 111.1, 111.0, 82.5, 82.5, 71.6, 71.4, 37.2, 37.1, 34.7, 33.1, 33.1, 29.2, 29.1, 18.8, 15.4, 11.9, 11.4. IR  $\nu$  ( $\text{cm}^{-1}$ ) 2942, 2864, 2360, 2341, 2164, 1489, 1462, 996, 863. HRMS (ESI-ion trap) calcd for  $\text{C}_{24}\text{H}_{39}\text{BrNOSi}^+$  ( $[\text{M}+\text{H}]^+$ ) 464.1979, found 464.1962

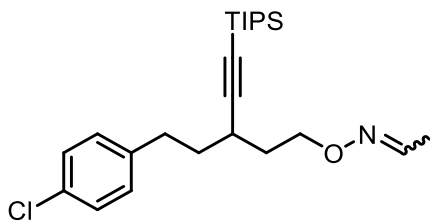

**3j**

Following the **general procedure**, oxime **1j** (23.7 mg, 0.100 mmol) was converted to the alkynylation product. Purification by column chromatography with EtOAc/Hexane as eluent gave the product **3j** (28.9 mg, 69% yield) as a colorless oil. Spectroscopic data are given

as a mixture of *cis* and *trans* isomers (1:1). **<sup>1</sup>H NMR** (400 MHz, Chloroform-*d*)  $\delta$  7.40 (q,  $J$  = 5.8 Hz, 0.5 H), 7.26 (m, 2H), 7.15 (m, 2H), 6.75 (q,  $J$  = 5.5 Hz, 1H), 4.24 (m, 2H), 2.87 (m, 1H), 2.76 (m, 1H), 2.54 (m, 1H), 1.83 (m, 7H), 1.11 (s, 21H). **<sup>13</sup>C NMR** (101 MHz, Chloroform-*d*)  $\delta$  146.9, 146.7, 140.6, 140.6, 131.7, 130.0, 128.6, 111.1, 111.0, 82.5, 82.4, 71.6, 71.4, 37.2, 37.1, 34.7, 33.1, 33.1, 29.2, 29.1, 18.8, 15.4, 11.9, 11.4. **IR**  $\nu$  (cm<sup>-1</sup>) 2941, 2890, 2864, 2361, 2341, 2164, 1492, 863. **HRMS** (ESI-ion trap) calcd for C<sub>24</sub>H<sub>39</sub>ClNOSi<sup>+</sup> ([M+H]<sup>+</sup>) 420.2484, found 420.2472

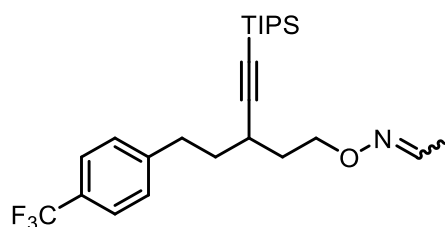

**3k**

Following the **general procedure**, oxime **1k** (27.1 mg, 0.100 mmol) was converted to the alkynylation product. Purification by column chromatography with EtOAc/Hexane as eluent gave the product **3k** (38.1 mg, 84% yield) as a colorless oil. Spectroscopic data are given as a mixture of *cis* and *trans* isomers (1:1). **<sup>1</sup>H NMR** (400 MHz, Chloroform-*d*)  $\delta$  7.53 (m, 2H), 7.37 (q,  $J$  = 5.9 Hz, 0.5H), 7.31 (m, 2H), 6.73 (m, 0.5H), 4.20 (m, 2H), 2.94 (m, 1H), 2.83 (m, 1H), 2.52 (m, 1H), 1.80 (m, 7H), 1.09 (s, 21H). **<sup>13</sup>C NMR** (101 MHz, Chloroform-*d*)  $\delta$  147.0, 146.8, 146.3, 129.0, 128.5, 128.2, 125.9, 125.5, 125.4, 125.4, 123.2, 110.9, 110.9, 82.6, 71.6, 71.3, 37.0, 36.9, 34.7, 33.6, 33.6, 29.2, 29.1, 18.8, 15.3, 11.9, 11.4. **IR**  $\nu$  (cm<sup>-1</sup>) 2943, 2866, 2361, 2341, 1772, 1733, 883, 750. **HRMS** (ESI-ion trap) calcd for C<sub>25</sub>H<sub>39</sub>F<sub>3</sub>NOSi<sup>+</sup> ([M+H]<sup>+</sup>) 454.2748, found 454.2728

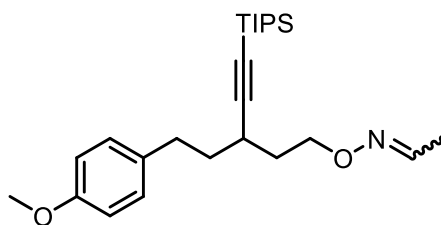

**3l**

Following the **general procedure**, oxime **1l** (23.3 mg, 0.100 mmol) was converted to the alkynylation product. Purification by column chromatography with EtOAc/Hexane as eluent gave the product **3l** (36.5 mg, 88% yield) as a colorless oil. Spectroscopic data are given as a mixture of *cis* and *trans* isomers (1:1). **<sup>1</sup>H NMR** (400 MHz, Chloroform-*d*)  $\delta$  7.40 (q,  $J$  = 5.8 Hz, 0.5H), 7.14 (m, 2H), 6.85 (m, 2H), 6.75 (q,  $J$  = 5.5 Hz, 0.5H), 4.23 (m, 2H), 3.81 (s, 3H), 2.84 (m, 1H), 2.74 (m, 1H), 2.55 (m, 1H), 1.81 (m, 7H), 1.12 (s, 21H). **<sup>13</sup>C NMR** (101 MHz, Chloroform-*d*)  $\delta$  157.9, 146.9, 146.7, 134.4, 134.3, 129.5, 113.9, 111.4, 111.4, 82.2, 82.1, 71.8, 71.5, 55.4, 37.7, 37.6, 34.7, 32.8, 32.8, 29.2, 29.2, 18.8, 15.4, 12.0, 11.4, 11.4. **IR**  $\nu$  (cm<sup>-1</sup>) 2941, 2864, 2361, 2341, 1513, 1246, 750. **HRMS** (ESI-ion trap) calcd for C<sub>25</sub>H<sub>42</sub>NO<sub>2</sub>Si<sup>+</sup> ([M+H]<sup>+</sup>) 416.2979, found 416.2965

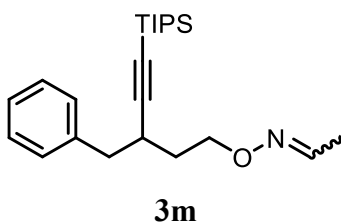

Following the **general procedure**, oxime **1m** (18.9 mg, 0.100 mmol) was converted to the alkynylation product. Purification by column chromatography with EtOAc/Hexane as eluent gave the product **3m** (33.4 mg, 90% yield) as a colorless oil. Spectroscopic data are given as a mixture of *cis* and *trans* isomers (1:1). **<sup>1</sup>H NMR** (400 MHz, Chloroform-*d*)  $\delta$  7.40 (q,  $J$  = 5.9 Hz, 0.5H), 7.27 (m, 4H), 7.20 (m, 1H), 6.75 (m, 0.5H), 4.22 (m, 2H), 2.81 (m, 3H), 1.93 (m, 1H), 1.84 (m, 3H), 1.74 (m, 1H), 1.03 (s, 21H). **<sup>13</sup>C NMR** (101 MHz, Chloroform-*d*)  $\delta$  146.9, 146.7, 139.5, 129.5, 128.2, 128.2, 126.3, 110.8, 82.7, 71.8, 71.4, 41.7, 34.3, 34.3, 31.7, 31.7, 18.7, 15.4, 12.0, 11.4. **IR**  $\nu$  (cm<sup>-1</sup>) 2941, 2864, 2360, 2342, 2165, 1462, 863, 676. **HRMS** (ESI-ion trap) calcd for C<sub>23</sub>H<sub>38</sub>NOSi<sup>+</sup> ([M+H]<sup>+</sup>) 372.2717, found 372.2705

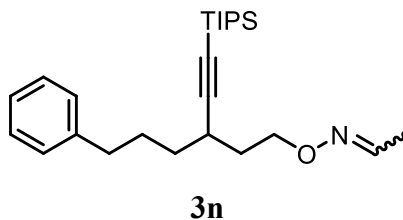

Following the **general procedure**, oxime **1n** (21.7 mg, 0.100 mmol) was converted to the alkynylation product. Purification by column chromatography with EtOAc/Hexane as eluent gave the product **3n** (30.3 mg, 76% yield) as a colorless oil. **<sup>1</sup>H NMR** (400 MHz, Chloroform-*d*)  $\delta$  7.26 (m, 2H), 7.17 (m, 3H), 6.74 (q, *J* = 5.5 Hz, 1H), 4.23 (m, 2H), 2.62 (m, 3H), 1.81 (m, 7H), 1.51 (m, 2H), 1.06 (s, 21H). **<sup>13</sup>C NMR** (101 MHz, Chloroform-*d*)  $\delta$  146.8, 142.6, 128.5, 128.4, 125.8, 111.6, 81.7, 71.8, 35.8, 34.9, 34.8, 29.5, 29.1, 18.8, 12.0, 11.4. **IR**  $\nu$  (cm<sup>-1</sup>) 2943, 2865, 2360, 2253, 1636, 1375, 1039, 919. **HRMS** (ESI-ion trap) calcd for C<sub>25</sub>H<sub>42</sub>NOSi<sup>+</sup> ([M+H]<sup>+</sup>) 400.3030, found 400.3016

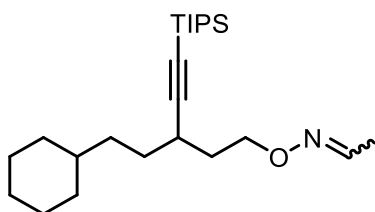

**3o**

Following the **general procedure**, oxime **1o** (20.9 mg, 0.100 mmol) was converted to the alkynylation product. Purification by column chromatography with EtOAc/Hexane as eluent gave the product **3o** (25.4 mg, 65% yield) as a colorless oil. Spectroscopic data are given as a mixture of *cis* and *trans* isomers (1:1). **<sup>1</sup>H NMR** (400 MHz, Chloroform-*d*)  $\delta$  7.40 (q, *J* = 5.9 Hz, 0.5H), 6.74 (q, *J* = 5.5 Hz, 0.5H), 4.22 (m, 2H), 2.48 (m, 1H), 1.84 (m, 3H), 1.68 (m, 4H), 1.44 (m, 3H), 1.20 (m, 7H), 1.06 (s, 21H), 0.89 (m, 3H). **<sup>13</sup>C NMR** (101 MHz, Chloroform-*d*)  $\delta$  146.8, 146.6, 112.0, 112.0, 81.4, 71.9, 71.6, 37.6, 35.0, 34.7, 33.8, 33.3, 32.8, 32.7, 29.8, 29.8, 26.9, 26.5, 26.5, 18.8, 15.4, 12.0, 11.4. **IR**  $\nu$  (cm<sup>-1</sup>) 2921, 2863, 2361, 2341, 2165, 2030, 1462, 861, 661. **HRMS** (ESI-ion trap) calcd for C<sub>24</sub>H<sub>46</sub>NOSi<sup>+</sup> ([M+H]<sup>+</sup>) 392.3343, found 392.3326

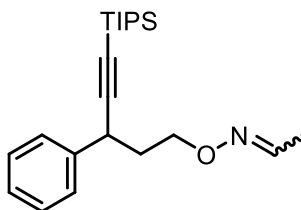

**3p**

Following the **general procedure**, oxime **1p** (17.5 mg, 0.100 mmol) was converted to the alkynylation product. Purification by column chromatography with EtOAc/Hexane as eluent gave the product **3p** (9.60 mg, 27% yield) as a colorless oil. Spectroscopic data are given as a mixture of *cis* and *trans* isomers (1:1). **<sup>1</sup>H NMR** (400 MHz, Chloroform-*d*)  $\delta$  7.40 (m, 2.5H), 7.32 (m, 2H), 7.22 (m, 1H), 6.76 (q, *J* = 5.5 Hz, 1H), 4.19 (m, 2H), 3.86 (m, 1H), 2.10 (m, 2H), 1.84 (m, 3H), 1.09 (s, 21H). **<sup>13</sup>C NMR** (101 MHz, Chloroform-*d*)  $\delta$  146.9, 146.7, 138.5, 128.5, 127.9, 127.6, 109.0, 82.5, 73.4, 73.3, 73.2, 73.2, 71.5, 71.2, 31.5, 31.5, 30.7, 30.6, 18.8, 15.4, 12.0, 11.4, 11.4. **IR**  $\nu$  (cm<sup>-1</sup>) 2941, 2864, 2360, 2341, 1541, 750, 669. **HRMS** (ESI-ion trap) calcd for C<sub>22</sub>H<sub>36</sub>NOSi<sup>+</sup> ([M+H]<sup>+</sup>) 358.2561, found 358.2550

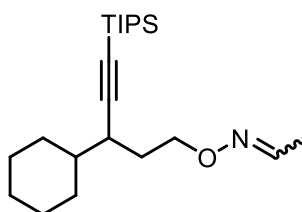

**3q**

Following the **general procedure**, oxime **1q** (18.1 mg, 0.100 mmol) was converted to the alkynylation product. Purification by column chromatography with EtOAc/Hexane as eluent gave the product **3q** (19.6 mg, 54% yield) as a colorless oil. Spectroscopic data are given as a mixture of *cis* and *trans* isomers (1:1). **<sup>1</sup>H NMR** (400 MHz, Chloroform-*d*)  $\delta$  7.40 (q, *J* = 5.8 Hz, 0.5H), 6.74 (q, *J* = 5.5 Hz, 0.5H), 4.19 (m, 2H), 2.42 (m, 1H), 1.75 (m, 10H), 1.21 (m, 6H), 1.06 (s, 21H). **<sup>13</sup>C NMR** (101 MHz, Chloroform-*d*)  $\delta$  146.8, 146.6, 110.5, 110.5, 82.4, 72.3, 72.0, 41.6, 41.5, 35.8, 35.7, 32.2, 31.7, 28.9, 28.8, 26.7, 26.7, 26.5, 18.8, 15.4, 12.0, 11.5. **IR**  $\nu$  (cm<sup>-1</sup>) 2925, 2863, 2360, 2341, 2164, 2030, 1463, 883, 676. **HRMS** (ESI-ion trap) calcd for C<sub>22</sub>H<sub>42</sub>NOSi<sup>+</sup> ([M+H]<sup>+</sup>) 364.3030, found 364.3015

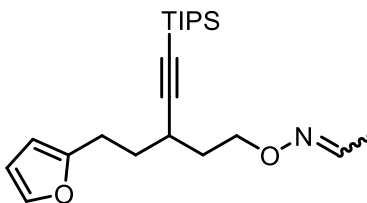

**3r**

Following the **general procedure**, oxime **1r** (19.3 mg, 0.100 mmol) was converted to the alkynylation product. Purification by column chromatography with EtOAc/Hexane as eluent gave the product **3r** (29.6 mg, 79% yield) as a colorless oil. Spectroscopic data are given as a mixture of *cis* and *trans* isomers (1:1). **<sup>1</sup>H NMR** (400 MHz, Chloroform-*d*)  $\delta$  7.42 (q, *J* = 5.8 Hz, 0.5H), 7.32 (d, *J* = 1.8 Hz, 1H), 6.76 (q, *J* = 5.5 Hz, 0.5H), 6.30 (s, 1H), 6.02 (s, 1H), 4.26 (m, 2H), 2.90 (m, 1H), 2.82 (m, 1H), 2.60 (m, 1H), 1.85 (m, 7H), 1.10 (s, 21H). **<sup>13</sup>C NMR** (101 MHz, Chloroform-*d*) 155.9, 155.8, 146.9, 146.7, 141.0, 110.9, 110.9, 110.2, 105.1, 105.1, 82.4, 82.3, 71.7, 71.4, 34.6, 33.8, 33.7, 29.2, 26.0, 18.8, 15.4, 12.0, 11.4. **IR**  $\nu$  (cm<sup>-1</sup>) 2942, 2864, 2360, 2341, 2165, 1463, 863, 661. **HRMS** (ESI-ion trap) calcd for C<sub>22</sub>H<sub>38</sub>NO<sub>2</sub>Si<sup>+</sup> ([M+H]<sup>+</sup>) 376.2666, found 376.2647

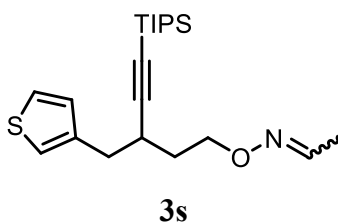

Following the **general procedure**, oxime **1s** (19.5 mg, 0.100 mmol) was converted to the alkynylation product. Purification by column chromatography with EtOAc/Hexane as eluent gave the product **3s** (28.3 mg, 75% yield) as a yellow oil. Spectroscopic data are given as a mixture of *cis* and *trans* isomers (1:1). **<sup>1</sup>H NMR** (400 MHz, Chloroform-*d*)  $\delta$  7.40 (q, *J* = 5.8 Hz, 0.5H), 7.13 (m, 1H), 6.90 (m, 2H), 6.74 (q, *J* = 5.5 Hz, 0.5H), 4.21 (m, 2H), 3.03 (m, 2H), 2.86 (m, 1H), 1.94 (m, 1H), 1.84 (m, 3H), 1.75 (m, 1H), 1.08 (s, 21H). **<sup>13</sup>C NMR** (101 MHz, Chloroform-*d*)  $\delta$  146.9, 146.8, 141.7, 141.7, 126.6, 126.6, 125.9, 125.9, 123.8, 123.8, 110.4, 110.4, 83.0, 83.0, 71.6, 71.3, 35.9, 34.0, 34.0, 32.1, 32.0, 18.8, 18.7, 15.3, 12.0, 11.4. **IR**  $\nu$  (cm<sup>-1</sup>) 2941, 2890, 2864, 2360, 2341, 2166, 1462, 1017, 852. **HRMS** (ESI-ion trap) calcd for C<sub>21</sub>H<sub>36</sub>NOSSi<sup>+</sup> ([M+H]<sup>+</sup>) 378.2281, found 378.2268

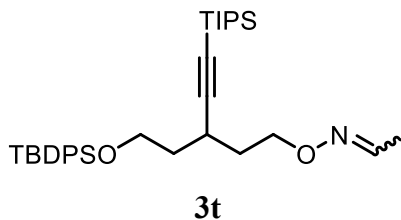

Following the **general procedure**, oxime **1t** (38.1 mg, 0.100 mmol) was converted to the alkynylation product. Purification by column chromatography with EtOAc/Hexane as eluent gave the product **3t** (41.7 mg, 74% yield) as a colorless oil. Spectroscopic data are given as a mixture of *cis* and *trans* isomers (1:1). **<sup>1</sup>H NMR** (400 MHz, Chloroform-*d*)  $\delta$  7.69 (m, 4H), 7.41 (m, 6.5H), 6.78 (q, *J* = 5.5 Hz, 0.5H), 4.28 (m, 2H), 3.90 (m, 2H), 2.88 (m, 1H), 1.84 (m, 7H), 1.07 (m, 30H). **<sup>13</sup>C NMR** (101 MHz, Chloroform-*d*)  $\delta$  146.8, 146.6, 135.7, 135.6, 134.2, 134.1, 129.6, 127.7, 111.2, 81.7, 81.7, 71.7, 71.4, 62.0, 62.0, 38.3, 38.3, 34.8, 34.8, 27.0, 26.2, 26.2, 19.4, 18.8, 15.4, 12.0, 11.4. **IR**  $\nu$  (cm<sup>-1</sup>) 2941, 2863, 2360, 2341, 2165, 1463, 1428, 1110, 701. **HRMS** (ESI-ion trap) calcd for C<sub>34</sub>H<sub>54</sub>NO<sub>2</sub>Si<sub>2</sub><sup>+</sup> ([M+H]<sup>+</sup>) 564.3688, found 564.3672

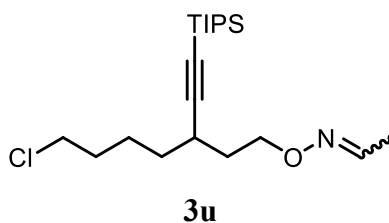

Following the **general procedure**, oxime **1u** (18.9 mg, 0.100 mmol) was converted to the alkynylation product. Purification by column chromatography with EtOAc/Hexane as eluent gave the product **3u** (30.8 mg, 83% yield) as a colorless oil. Spectroscopic data are given as a mixture of *cis* and *trans* isomers (1:1). **<sup>1</sup>H NMR** (400 MHz, Chloroform-*d*)  $\delta$  7.40 (q, *J* = 5.9 Hz, 0.5H), 6.75 (q, *J* = 5.5 Hz, 0.5H), 4.23 (m, 1H), 4.17 (m, 1H), 3.53 (m, 2H), 2.54 (m, 1H), 1.83 (m, 8H), 1.50 (m, 3H), 1.06 (m, 21H). **<sup>13</sup>C NMR** (101 MHz, Chloroform-*d*)  $\delta$  146.9, 146.7, 111.3, 111.2, 82.0, 71.8, 71.5, 45.1, 34.8, 34.6, 32.6, 32.6, 29.6, 29.5, 24.8, 24.8, 18.8, 15.4, 12.0, 11.4. **IR**  $\nu$  (cm<sup>-1</sup>) 2943, 2866, 2360, 2341, 1717, 1699, 882, 669. **HRMS** (ESI-ion trap) calcd for C<sub>20</sub>H<sub>39</sub>ClNOSi<sup>+</sup> ([M+H]<sup>+</sup>) 372.2484, found 372.2468

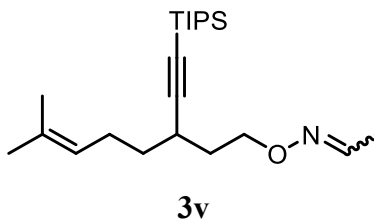



Following the **general procedure**, oxime **1v** (18.1 mg, 0.100 mmol) was converted to the alkynylation product. Purification by column chromatography with EtOAc/Hexane as eluent gave the product **3v** (26.9 mg, 74% yield) as a colorless oil. Spectroscopic data are given as a mixture of *cis* and *trans* isomers (1:1). **<sup>1</sup>H NMR** (400 MHz, Chloroform-*d*)  $\delta$  7.42 (q, *J* = 5.8 Hz, 0.5H), 6.76 (q, *J* = 5.5 Hz, 0.5H), 5.13 (m, 1H), 4.25 (m, 2H), 2.55 (m, 1H), 2.22 (m, 2H), 1.85 (m, 5H), 1.71 (m, 3H), 1.64 (m, 3H), 1.50 (m, 2H), 1.09 (s, 21H). **<sup>13</sup>C NMR** (101 MHz, Chloroform-*d*)  $\delta$  146.8, 146.6, 132.2, 132.2, 124.1, 111.8, 111.7, 81.6, 81.6, 71.9, 71.6, 35.7, 35.6, 34.8, 29.3, 29.3, 26.0, 25.9, 18.8, 17.8, 15.4, 12.0, 11.4. **IR**  $\nu$  (cm<sup>-1</sup>) 2941, 2864, 2360, 2341, 2164, 1462, 862, 660. **HRMS** (ESI-ion trap) calcd for C<sub>22</sub>H<sub>42</sub>NOSi<sup>+</sup> ([M+H]<sup>+</sup>) 364.3030, found 364.3015

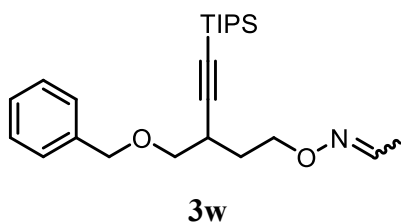

Following the **general procedure**, oxime (*Z*)-**1w** (21.9 mg, 0.100 mmol) was converted to the alkynylation product. Purification by column chromatography with EtOAc/Hexane as eluent gave the product **3w** (9.20 mg, 23% yield) as a colorless oil.

Following the **general procedure**, oxime (*E*)-**1w** (21.9 mg, 0.100 mmol) was converted to the alkynylation product. Purification by column chromatography with EtOAc/Hexane as eluent gave the product **3w** (27.7 mg, 69% yield) as a colorless oil.

Spectroscopic data are given as a mixture of *cis* and *trans* isomers (1:1). **<sup>1</sup>H NMR** (400 MHz, Chloroform-*d*)  $\delta$  7.34 (m, 5.5H), 6.74 (m, 0.5H), 4.57 (m, 2H), 4.27 (m, 2H), 3.61 (m, 1H), 3.50 (m, 1H), 2.89 (m, 1H), 2.07 (m, 1H), 1.84 (m, 3H), 1.75 (m, 1H), 1.03 (m, 21H). **<sup>13</sup>C NMR** (101 MHz, Chloroform-*d*)  $\delta$  146.9, 146.7, 138.5, 128.5, 127.9, 127.6, 109.0, 82.5, 73.4, 73.3, 73.2, 72.4, 71.5, 71.2, 31.5, 31.5, 30.7, 30.6, 18.8, 15.4, 12.0, 11.4, 11.4. **IR**  $\nu$  (cm<sup>-1</sup>) 2941, 2864, 2360, 2341, 2167, 1463, 860. **HRMS** (ESI-ion trap) calcd for C<sub>24</sub>H<sub>40</sub>NO<sub>2</sub>Si<sup>+</sup> ([M+H]<sup>+</sup>) 402.2823, found 402.2805

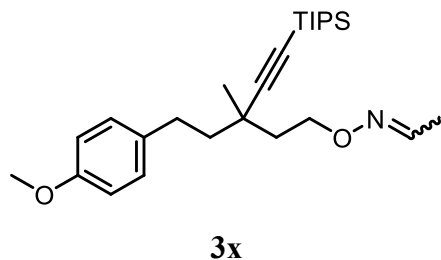

Following the **general procedure**, oxime **1x** (24.7 mg, 0.100 mmol) was converted to the alkynylation product. Purification by column chromatography with EtOAc/Hexane as eluent gave the product **3x** (16.3 mg, 38% yield) as a colorless oil. Spectroscopic data are given as a mixture of *cis* and *trans* isomers (1:1). **<sup>1</sup>H NMR** (400 MHz, Chloroform-*d*)  $\delta$  7.39 (q,  $J$  = 5.8 Hz, 0.5H), 7.10 (m, 2H), 6.83 (m, 2H), 6.74 (q,  $J$  = 5.5 Hz, 0.5H), 4.29 (m, 2H), 3.79 (s, 3H), 2.75 (m, 2H), 1.90 (m, 1H), 1.83 (m, 5H), 1.65 (m, 1H), 1.28 (m, 3H), 1.08 (s, 21H). **<sup>13</sup>C NMR** (101 MHz, Chloroform-*d*)  $\delta$  146.9, 146.7, 138.5, 128.5, 127.9, 127.6, 109.0, 82.5, 73.4, 73.3, 73.2, 73.2, 72.4, 71.5, 71.2, 31.5, 31.5, 30.7, 30.6, 18.8, 15.4, 12.0, 11.4, 11.4. **IR**  $\nu$  (cm<sup>-1</sup>) 2931, 2858, 2361, 2341, 1511, 1245, 1035, 824. **HRMS** (ESI-ion trap) calcd for C<sub>26</sub>H<sub>44</sub>NO<sub>2</sub>Si<sup>+</sup> ([M+H]<sup>+</sup>) 430.3136, found 430.3118

### Synthetic transformation of product

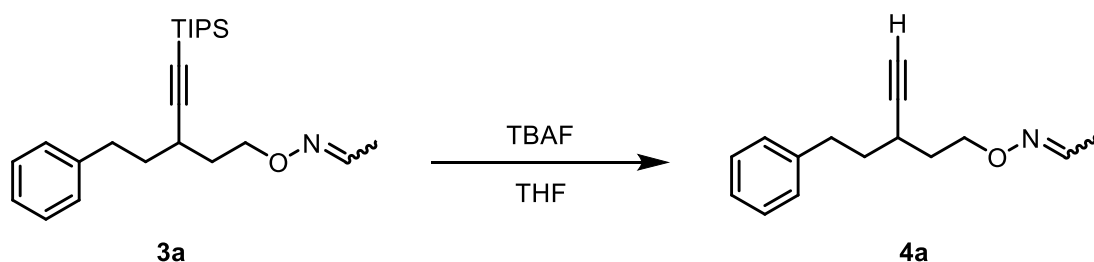

To a solution of **3a** (20 mg, 0.050 mmol) and 0.50 mL THF was added TBAF (1.0 M in THF, 0.50 mL). The reaction was stirred at room temperature for 5 min. Then the crude mixture was purified by column chromatography with EtOAc/Hexane as eluent to give **4a** (20 mg, 86%) as a colorless oil. Spectroscopic data are given as a mixture of *cis* and *trans* isomers (1:1). **<sup>1</sup>H NMR** (400 MHz, Chloroform-*d*)  $\delta$  7.38 (q,  $J$  = 5.8 Hz, 0.5H), 7.28 (m, 2H), 7.22 (m, 3H), 6.73 (q,  $J$  = 5.5 Hz, 0.5H), 4.23 (m, 2H), 2.75 (m, 1H), 2.73 (m, 1H),

2.51 (m, 1H), 2.14 (s, 1H), 1.81 (m, 7H). **<sup>13</sup>C NMR** (101 MHz, Chloroform-*d*)  $\delta$  147.0, 146.9, 142.0, 142.0, 128.6, 128.5, 128.5, 126.0, 86.9, 86.8, 71.5, 71.2, 70.4, 70.3, 36.9, 36.8, 34.4, 34.3, 33.6, 33.5, 27.9, 27.9, 15.4, 12.0. **IR**  $\nu$  (cm<sup>-1</sup>) 3294, 2925, 2361, 2341, 1053, 700. **HRMS** (ESI-ion trap) calcd for C<sub>15</sub>H<sub>20</sub>NO<sup>+</sup> ([M+H]<sup>+</sup>) 230.1539, found 230.1532

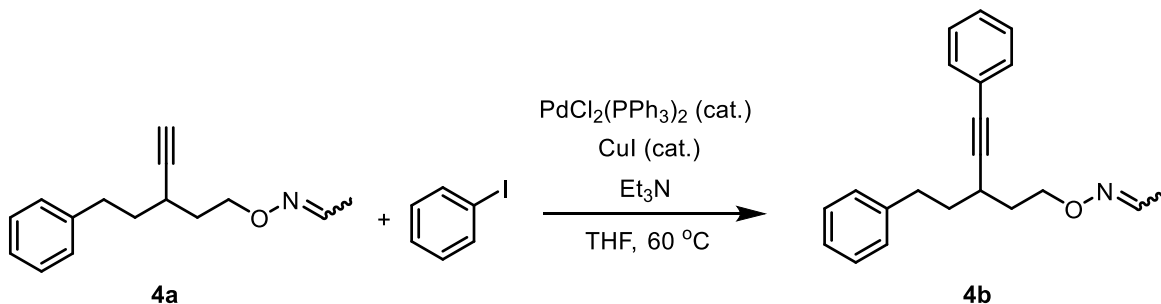

To a Schlenk flask was added **4a** (10 mg, 0.044 mmol), PdCl<sub>2</sub>(PPh<sub>3</sub>)<sub>2</sub> (1.5 mg, 5.0 mol%), CuI (0.50 mg, 5.0 mol%), Et<sub>3</sub>N (13 mg, 3.0 equiv) and 2.0 mL THF. The reaction was stirred at 60 °C for 2h. The mixture was purified by column chromatography with EtOAc/Hexane as eluent to give **4b** (9.8 mg, 73%) as a colorless oil. Spectroscopic data are given as a mixture of *cis* and *trans* isomers (1:1). **<sup>1</sup>H NMR** (400 MHz, Chloroform-*d*)  $\delta$  7.43 (m, 2.5H), 7.27 (m, 8H), 6.74 (q, *J* = 5.5 Hz, 1H), 4.28 (m, 2H), 2.93 (m, 1H), 2.72 (m, 2H), 1.82 (m, 7H). **<sup>13</sup>C NMR** (101 MHz, Chloroform-*d*)  $\delta$  147.0, 146.9, 142.1, 142.1, 131.8, 128.7, 128.5, 128.3, 127.8, 126.0, 124.0, 92.4, 92.3, 82.9, 82.8, 71.8, 71.5, 37.1, 37.1, 34.6, 34.6, 33.8, 33.8, 29.9, 28.8, 28.8, 15.4, 12.0. **IR**  $\nu$  (cm<sup>-1</sup>) 3027, 2923, 2857, 1727, 756, 693. **HRMS** (ESI-ion trap) calcd for C<sub>21</sub>H<sub>24</sub>NO<sup>+</sup> ([M+H]<sup>+</sup>) 306.1852, found 306.1842

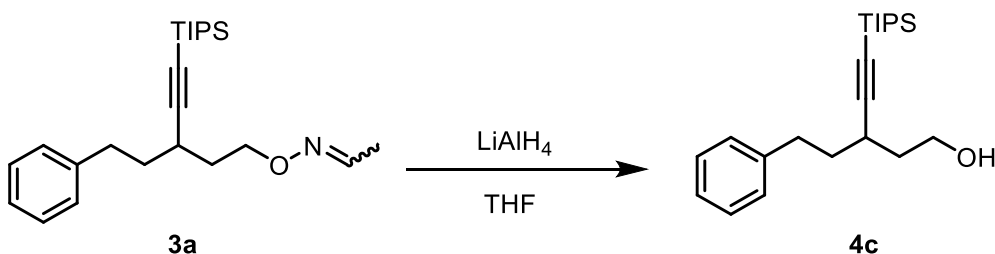

To a solution of LiAlH<sub>4</sub> (7.8 mg, 0.20 mmol) and 1.0 mL THF was added **3a** (20 mg, 0.050 mmol). The reaction was stirred at room temperature for 1 h. The mixture was purified by

column chromatography with EtOAc/Hexane as eluent to give **4c** (15 mg, 81%) as a colorless yield. <sup>1</sup>H NMR (400 MHz, Chloroform-*d*) δ 7.27 (m, 2H), 7.20 (m, 3H), 3.84 (t, *J* = 5.5 Hz, 2H), 2.89 (m, 1H), 2.75 (m, 1H), 2.57 (m, 1H), 1.77 (m, 5H), 1.10 (s, 21H). <sup>13</sup>C NMR (101 MHz, Chloroform-*d*) δ 142.1, 128.7, 128.5, 126.0, 111.5, 83.1, 61.6, 38.1, 37.6, 33.7, 29.6, 18.8, 11.4. HRMS (ESI-ion trap) calcd for C<sub>22</sub>H<sub>37</sub>OSi<sup>+</sup> ([M+H]<sup>+</sup>) 345.2608, found 345.2598

### Ee determination of **3a** and **3d**

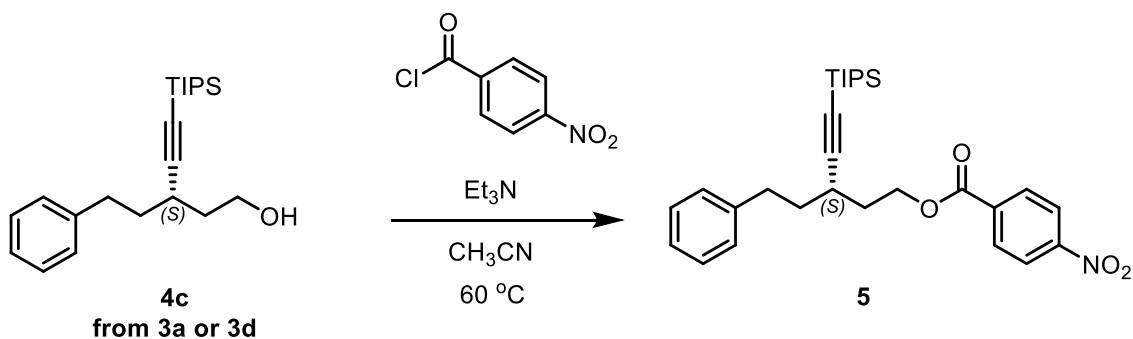

The ee value of **3a** and **3d** were determined by chiral HPLC analysis of the *p*-nitrobenzoate derivative following a literature procedure.<sup>2</sup>

Ee of **3a** (22%) was determined by CHIRALCEL® OD-H, 4.6 mm × 250 mm, hexane/2-propanol = 99:1, 0.5 mL/min, 40 °C, retention time = 22.3 min for *R* isomer and 30.4 min for *S* isomer.

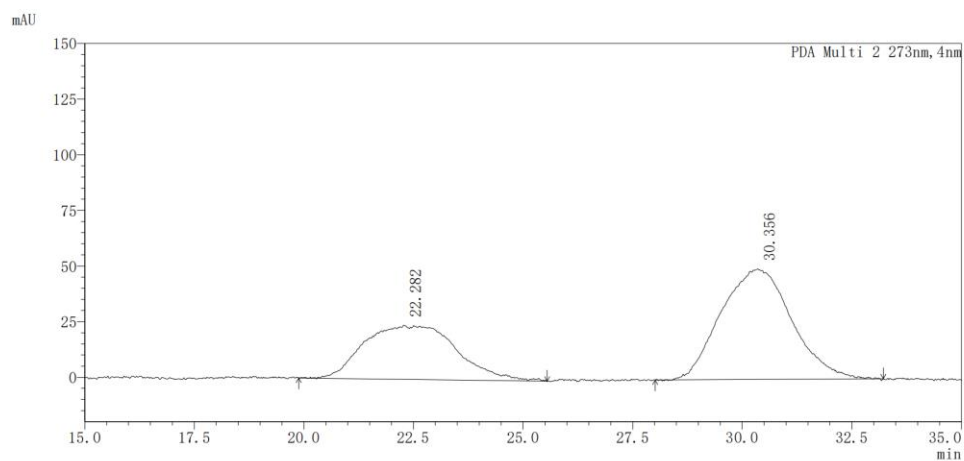

PDA Ch2 273nm

| Peak | Ret. Time | Height | Area    | Area%  |
|------|-----------|--------|---------|--------|
| 1    | 22.282    | 24364  | 3571922 | 39.023 |
| 2    | 30.356    | 49659  | 5581557 | 60.977 |

Ee of **3d** (47%) was determined by CHIRALCEL® OD-H, 4.6 mm × 250 mm, hexane/2-propanol = 99:1, 0.5 mL/min, 40 °C, retention time = 22.7 min for *R* isomer and 29.8 min for *S* isomer.

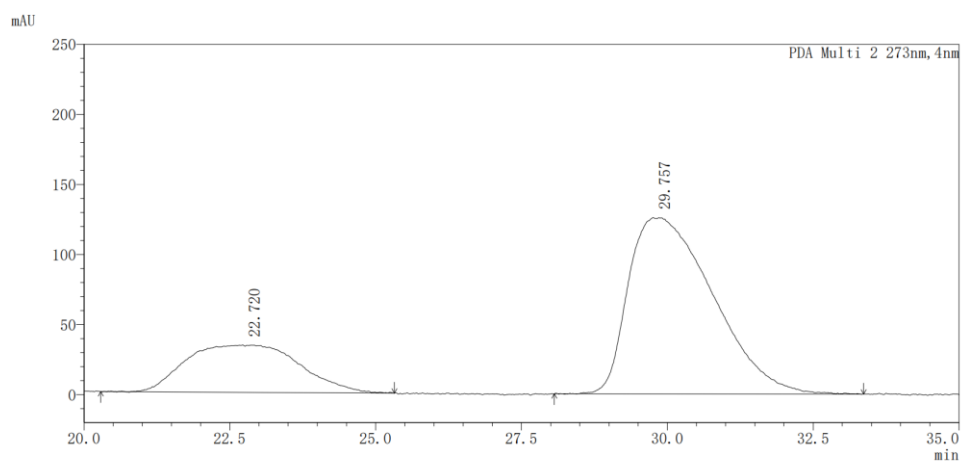

PDA Ch2 273nm

| Peak | Ret. Time | Height | Area     | Area%  |
|------|-----------|--------|----------|--------|
| 1    | 22.720    | 33932  | 4600181  | 26.636 |
| 2    | 29.757    | 125804 | 12670217 | 73.364 |

## References

1. Tsuchikama, K.; Kasagawa, M.; Endo, K.; Shibata, T. Cationic Ir(I)-Catalyzed  $\text{sp}^3$  C–H Bond Alkenylation of Amides with Alkynes. *Org. Lett.* **2009**, *11*, 1821-1823.
2. Harada, A.; Makida, Y.; Sato, T.; Ohmiya, H.; Sawamura, M. Copper-Catalyzed Enantioselective Allylic Alkylation of Terminal Alkyne Pronucleophiles. *J. Am. Chem. Soc.* **2014**, *136*, 13932-13939.

# Copy of NMR spectra

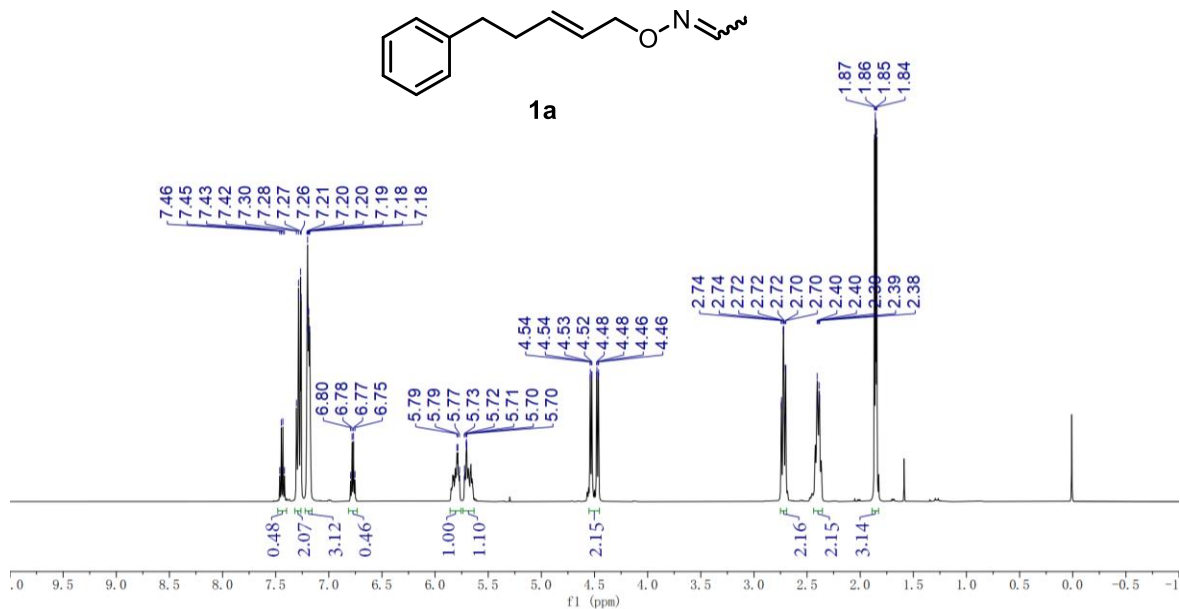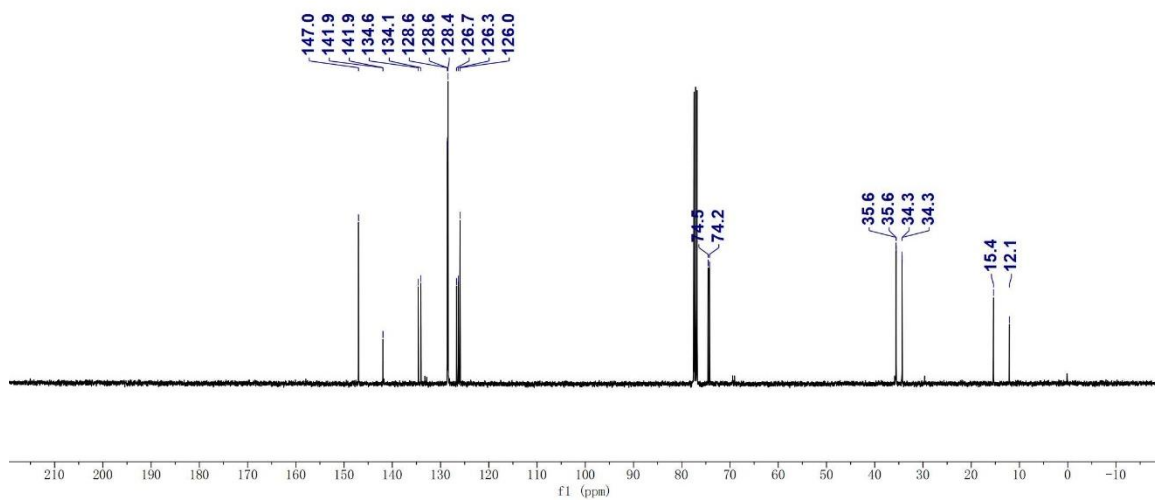

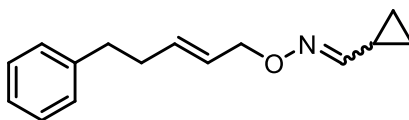

**1b**

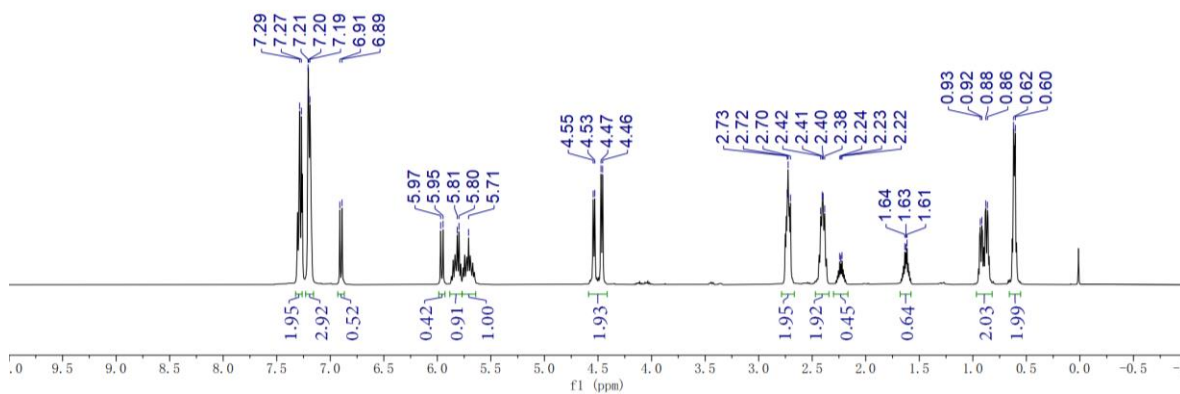

$^1\text{H}$  NMR spectrum of **1b** was measured in  $\text{CDCl}_3$  at 400 MHz

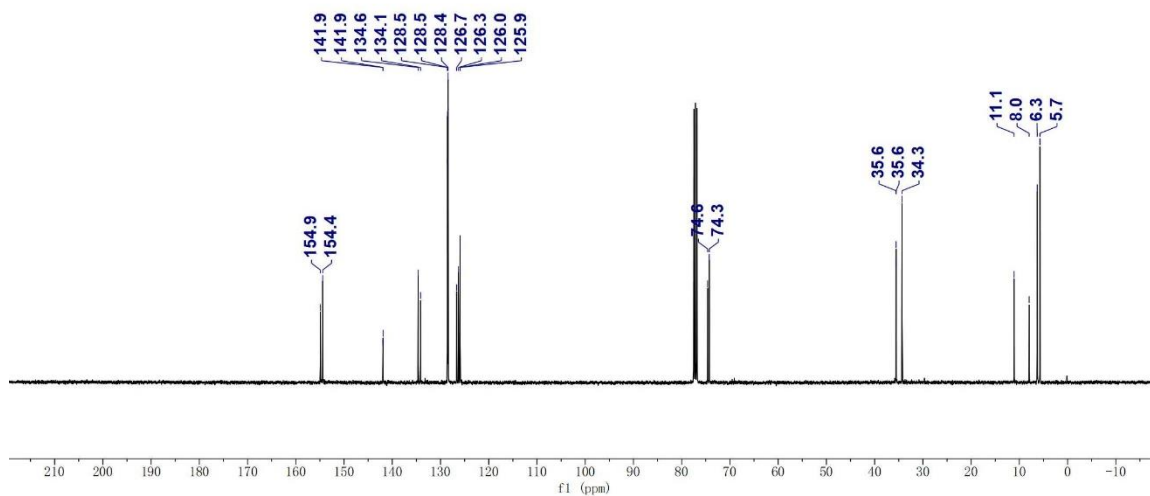

$^{13}\text{C}$  NMR spectrum of **1b** was measured in  $\text{CDCl}_3$  at 101 MHz



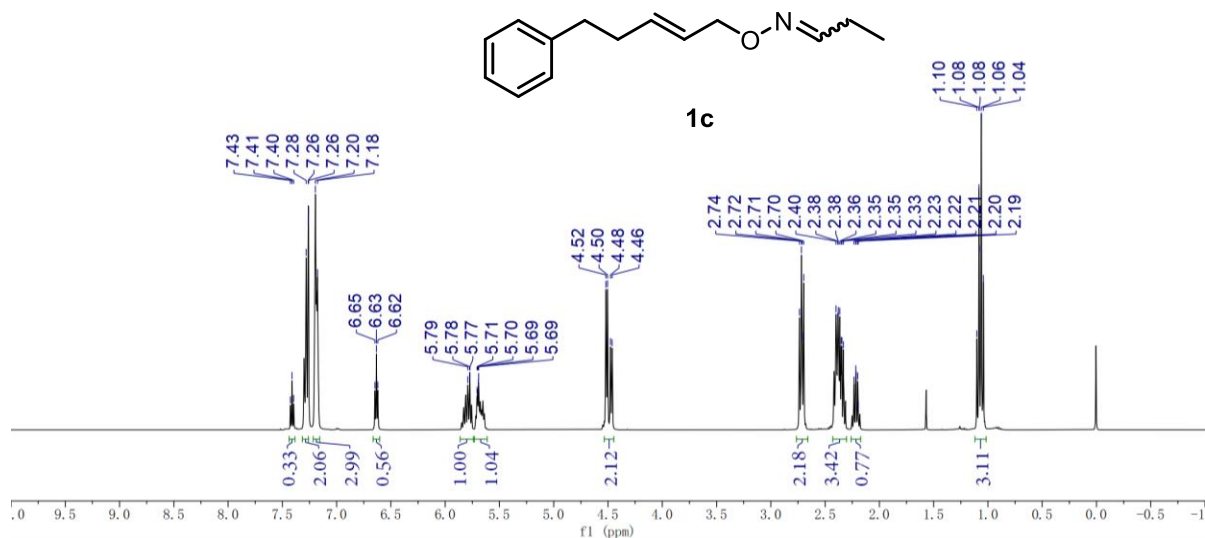

<sup>1</sup>H NMR spectrum of **1c** was measured in CDCl<sub>3</sub> at 400 MHz

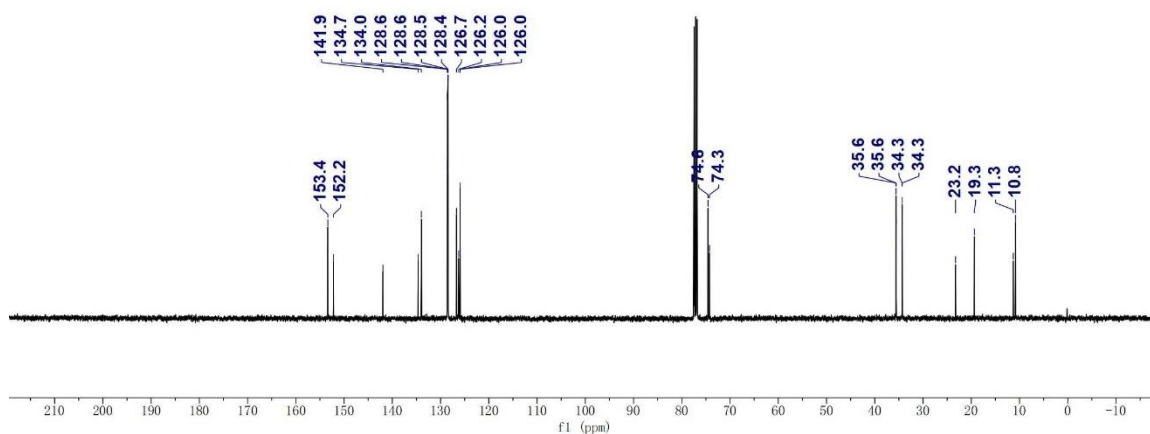

<sup>13</sup>C NMR spectrum of **1c** was measured in CDCl<sub>3</sub> at 101 MHz

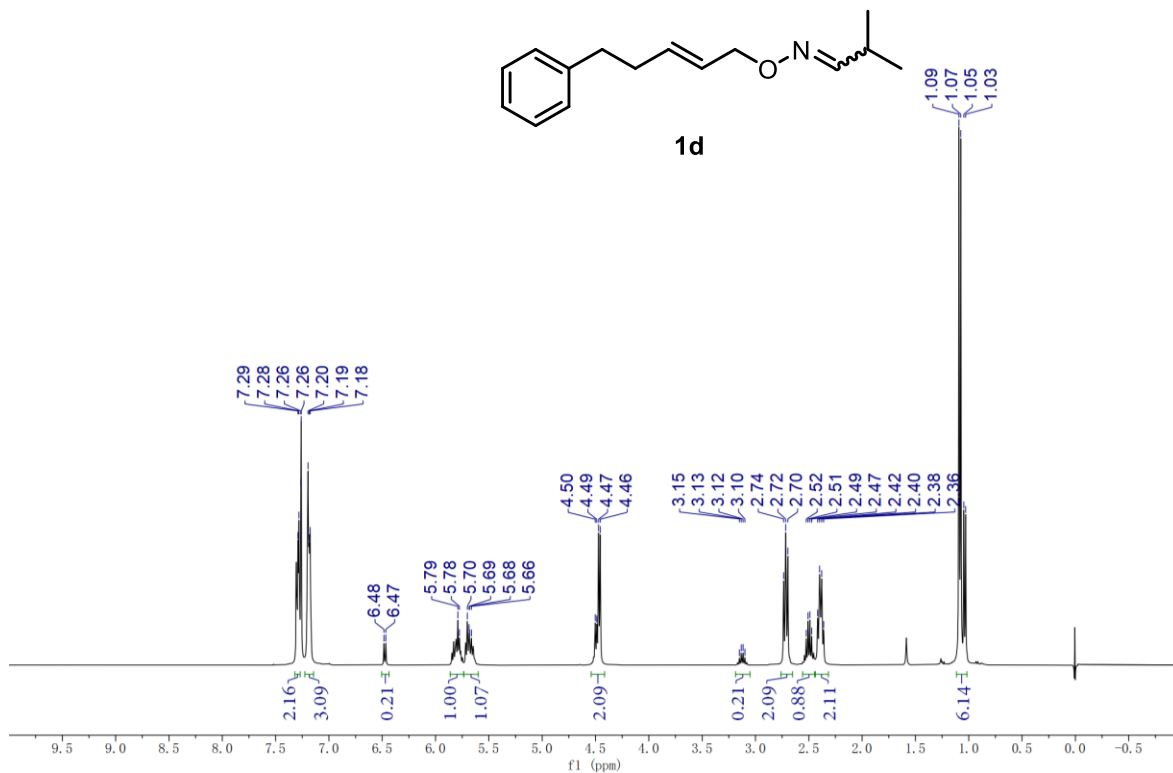

$^1\text{H}$  NMR spectrum of **1d** was measured in  $\text{CDCl}_3$  at 400 MHz

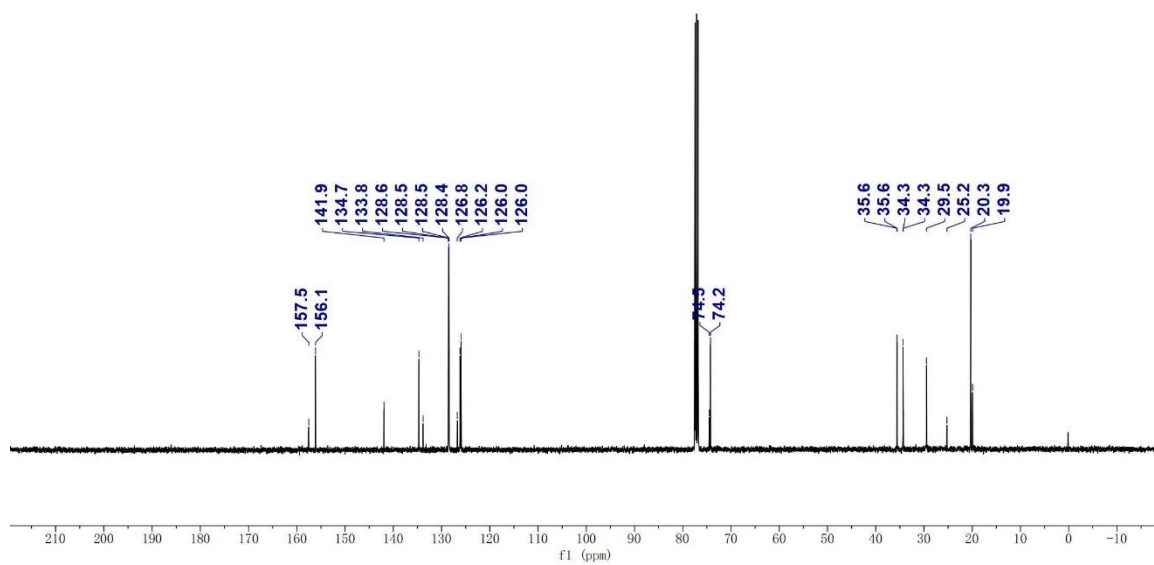

$^{13}\text{C}$  NMR spectrum of **1d** was measured in  $\text{CDCl}_3$  at 101 MHz

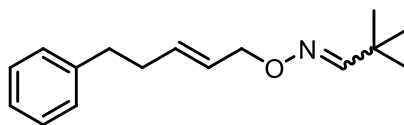**1e**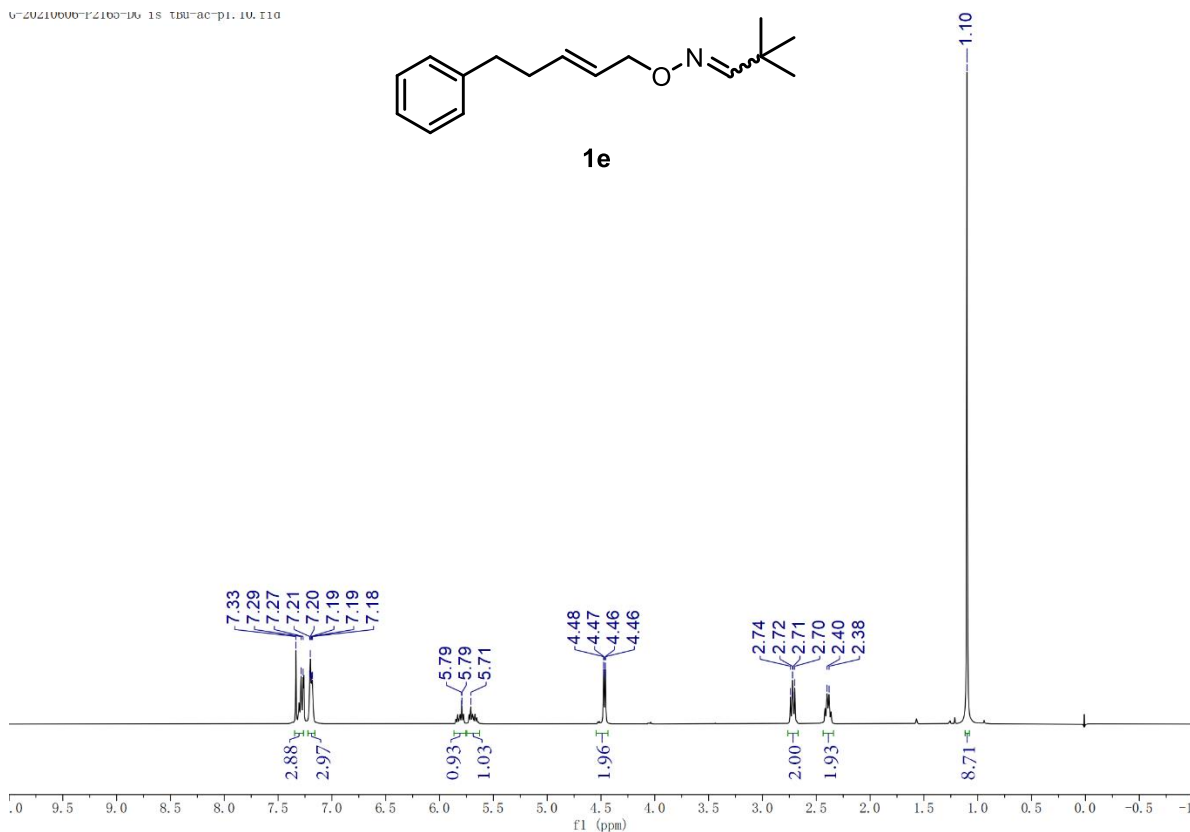

$^1\text{H}$  NMR spectrum of **1e** was measured in  $\text{CDCl}_3$  at 400 MHz

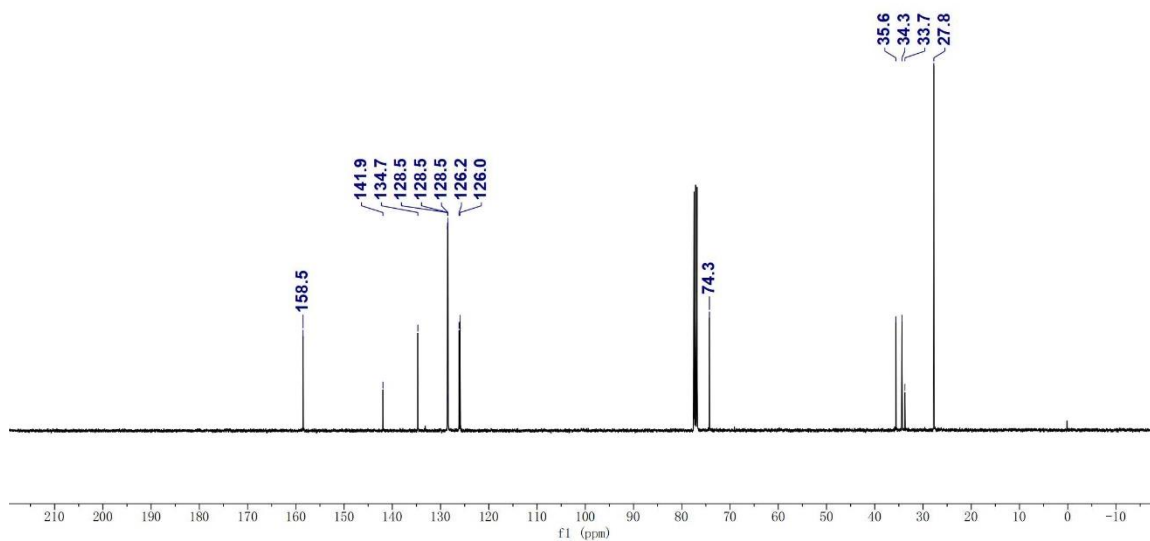

$^{13}\text{C}$  NMR spectrum of **1e** was measured in  $\text{CDCl}_3$  at 101 MHz

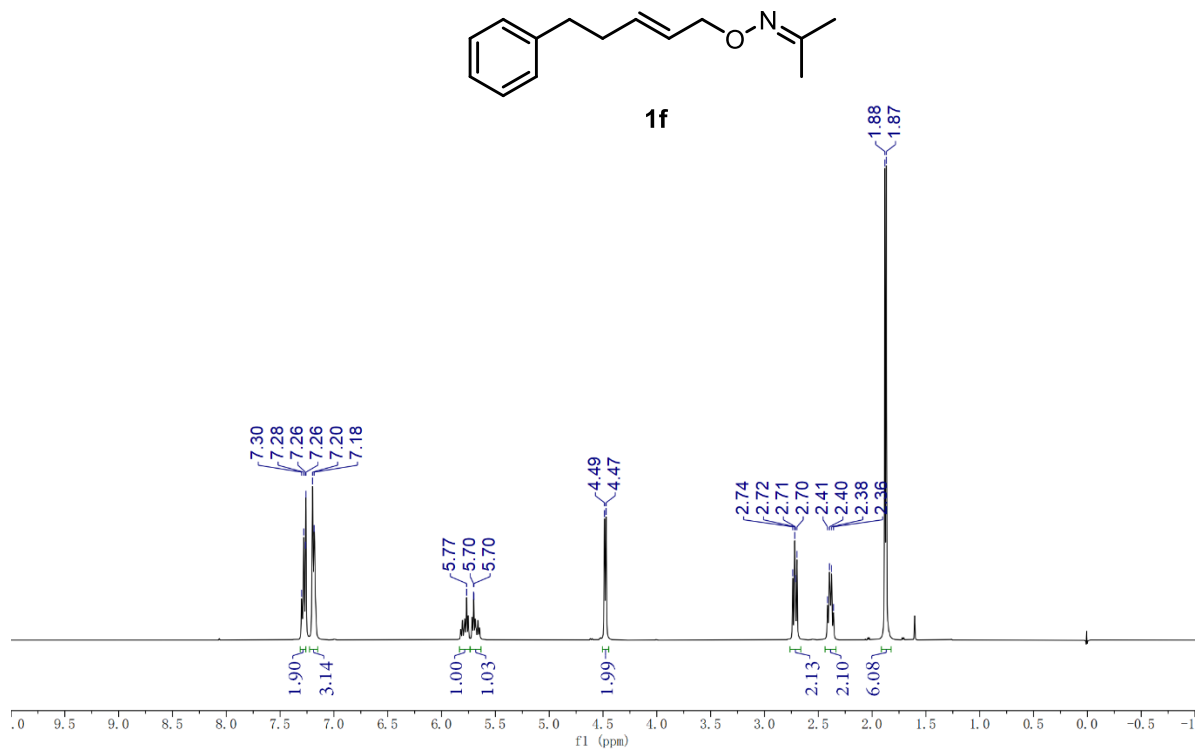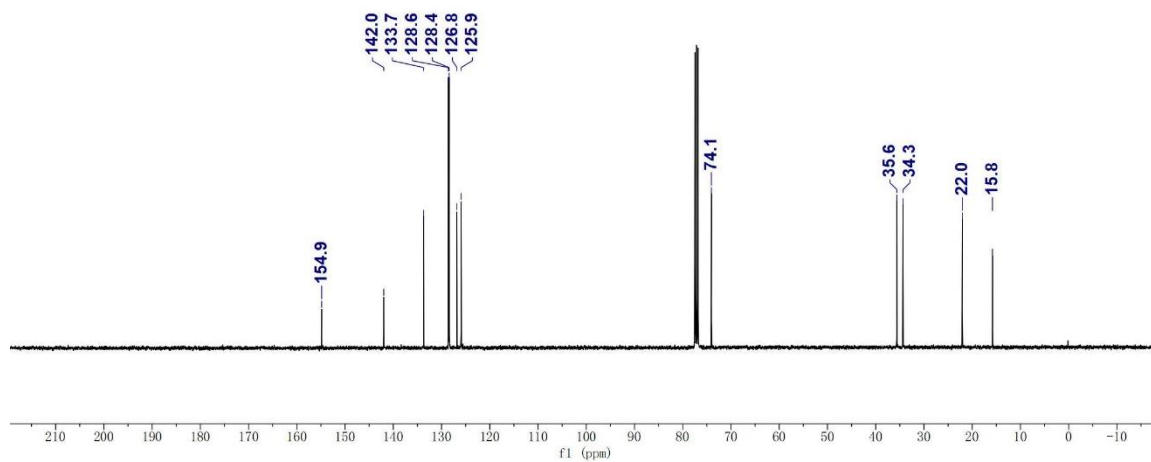

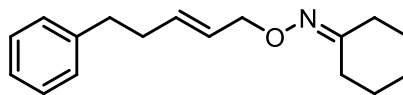

**1g**

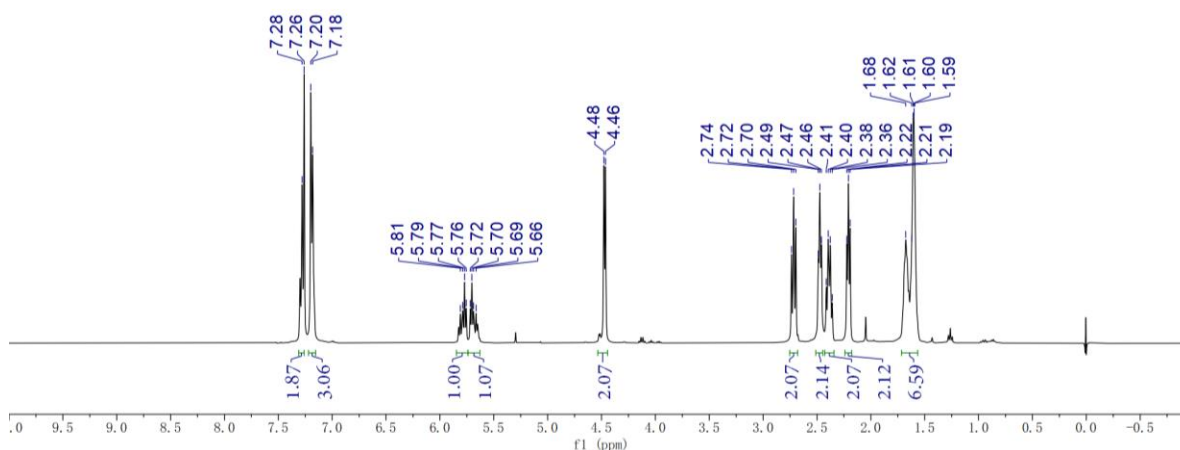

$^1\text{H}$  NMR spectrum of **1g** was measured in  $\text{CDCl}_3$  at 400 MHz

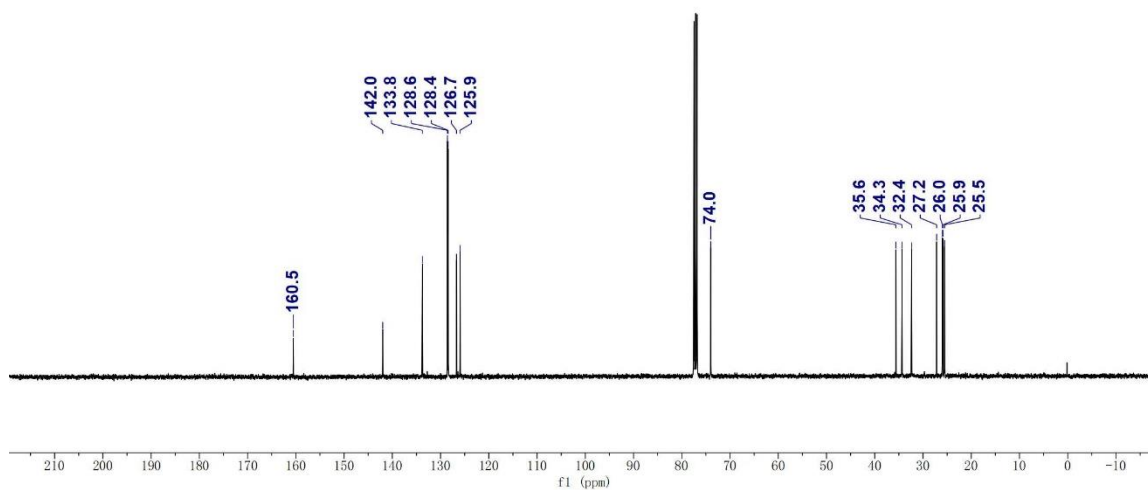

$^{13}\text{C}$  NMR spectrum of **1g** was measured in  $\text{CDCl}_3$  at 101 MHz

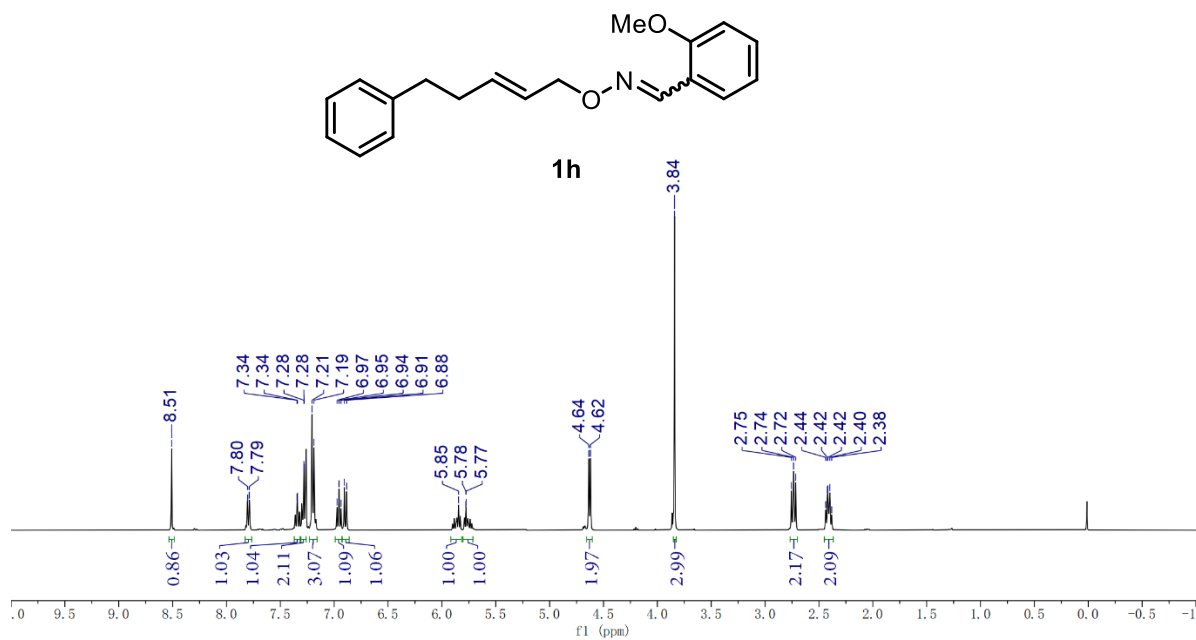

$^1\text{H}$  NMR spectrum of **1h** was measured in  $\text{CDCl}_3$  at 400 MHz

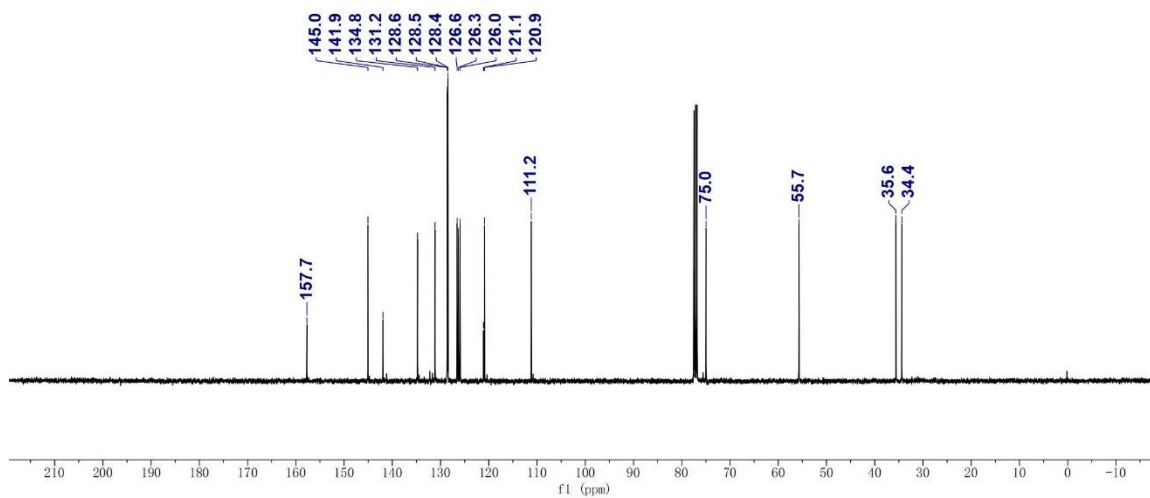

$^{13}\text{C}$  NMR spectrum of **1h** was measured in  $\text{CDCl}_3$  at 101 MHz

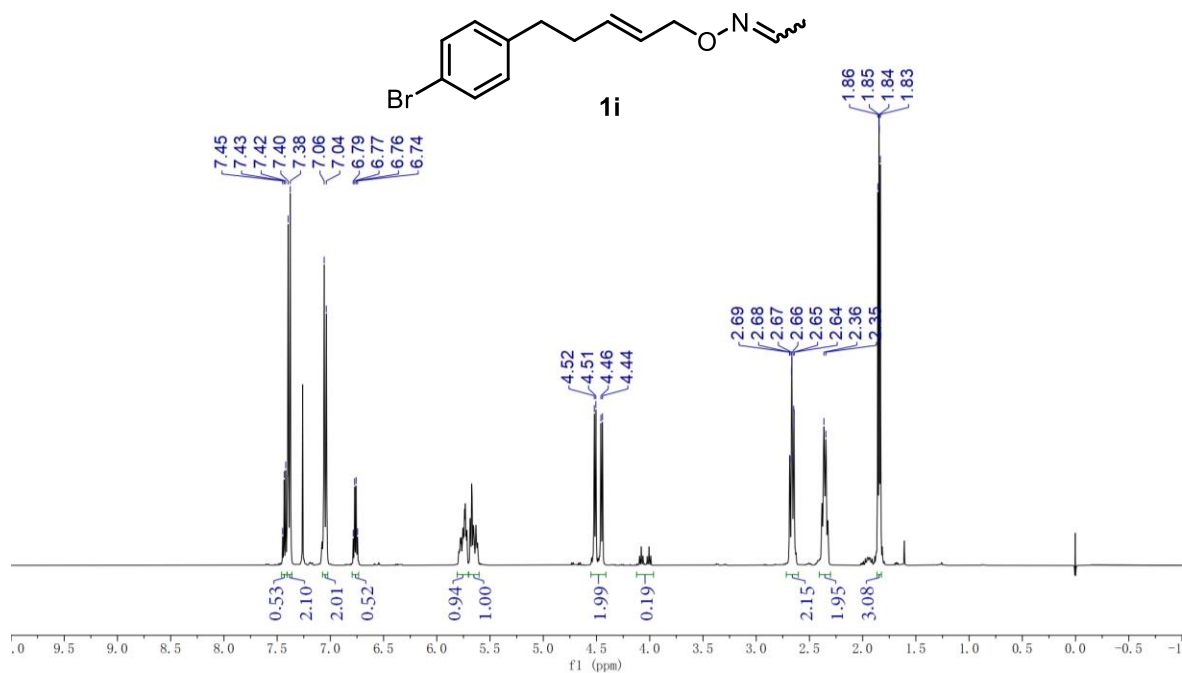

<sup>1</sup>H NMR spectrum of **1i** was measured in CDCl<sub>3</sub> at 400 MHz

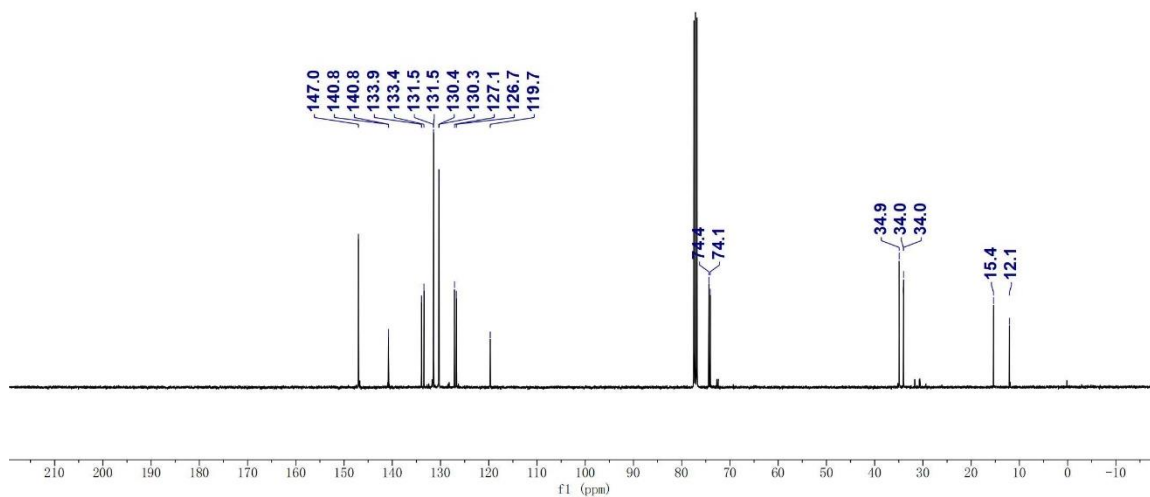

<sup>13</sup>C NMR spectrum of **1i** was measured in CDCl<sub>3</sub> at 101 MHz

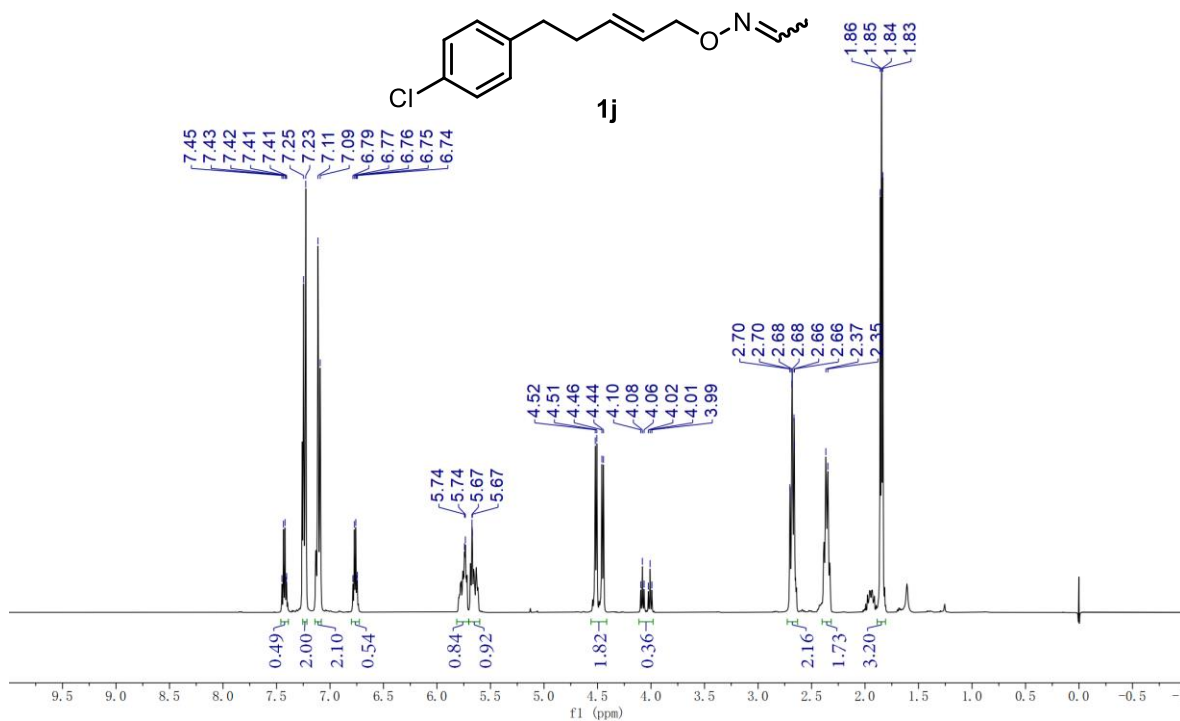

<sup>1</sup>H NMR spectrum of **1j** was measured in CDCl<sub>3</sub> at 400 MH

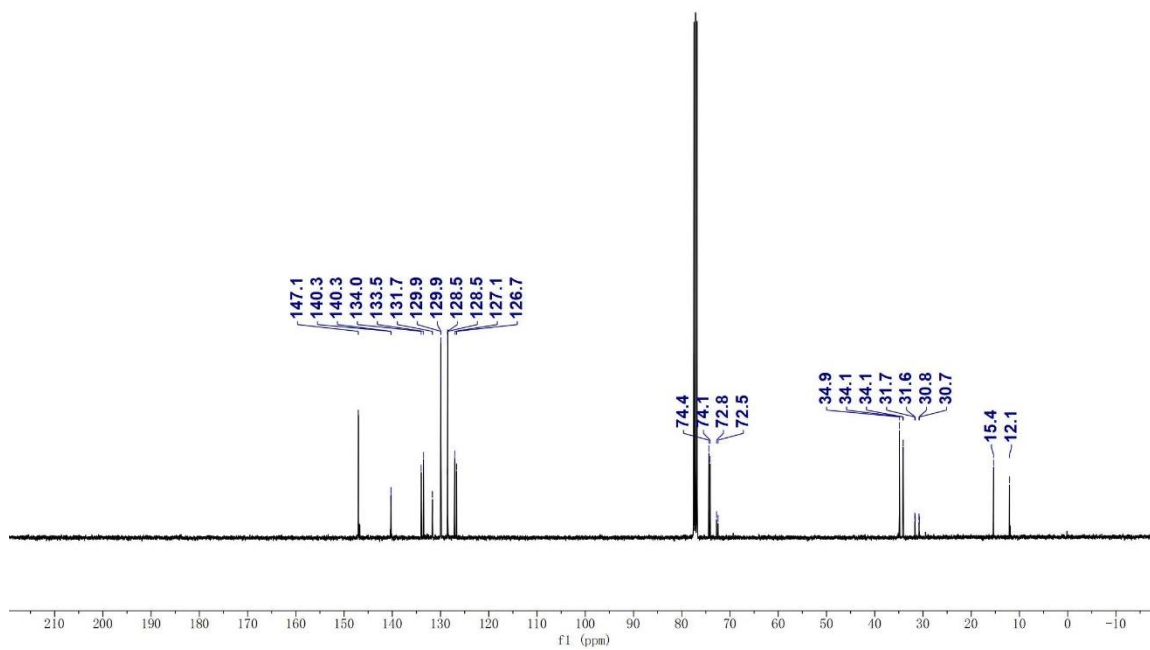

<sup>13</sup>C NMR spectrum of **1j** was measured in CDCl<sub>3</sub> at 101 MHz



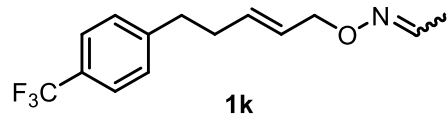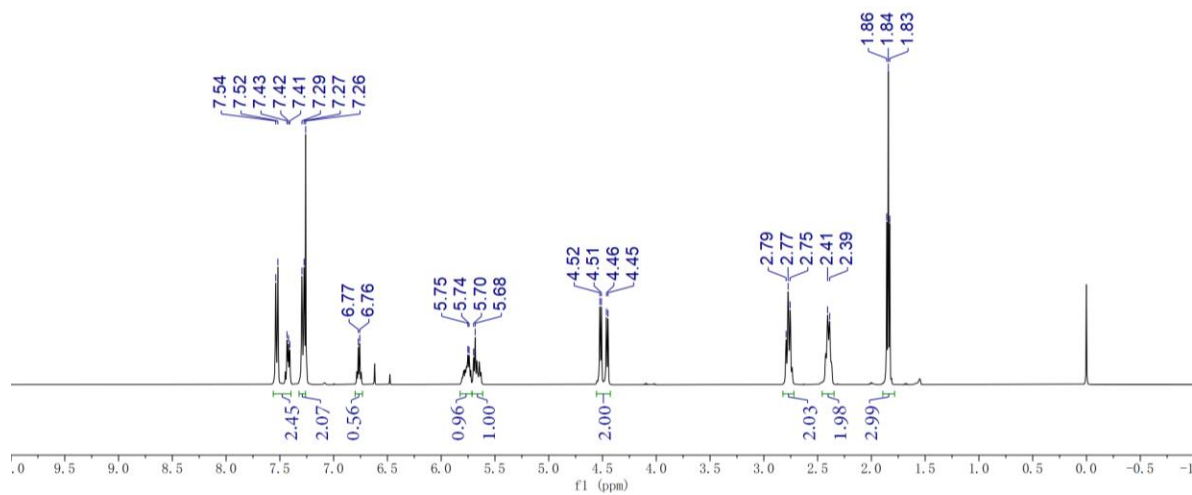

<sup>1</sup>H NMR spectrum of **1k** was measured in CDCl<sub>3</sub> at 400 MH

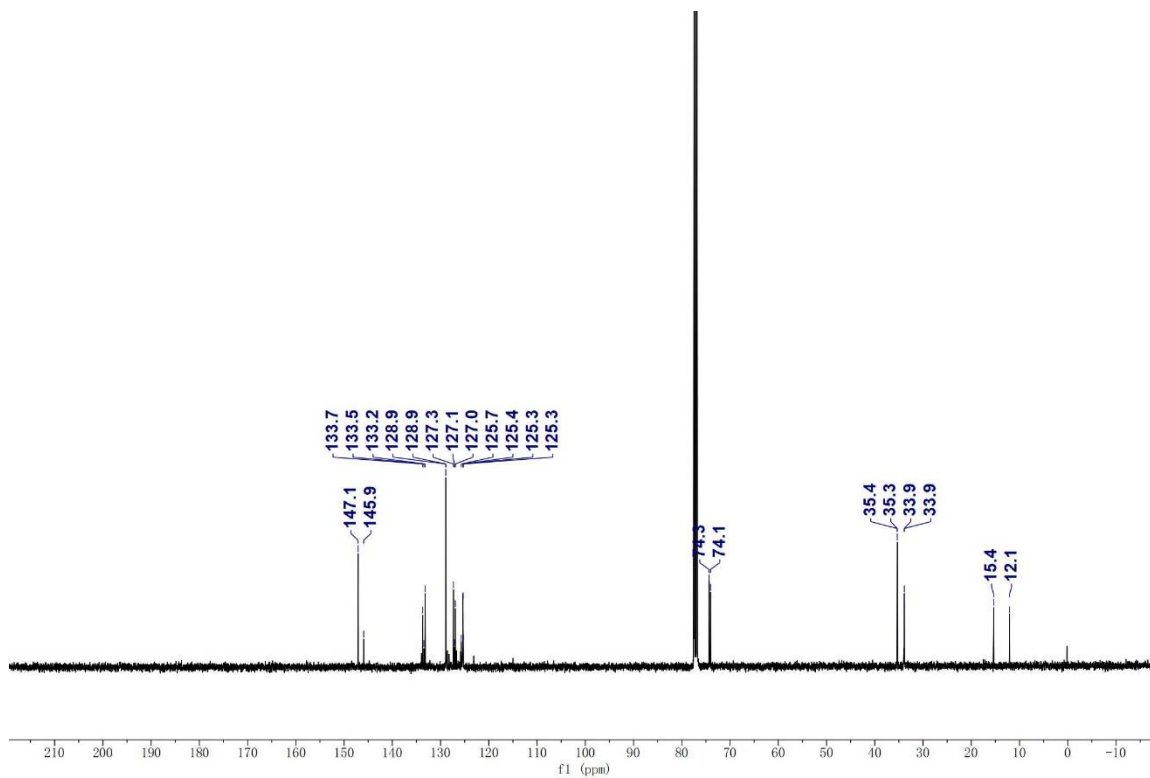

<sup>13</sup>C NMR spectrum of **1k** was measured in CDCl<sub>3</sub> at 101 MHz

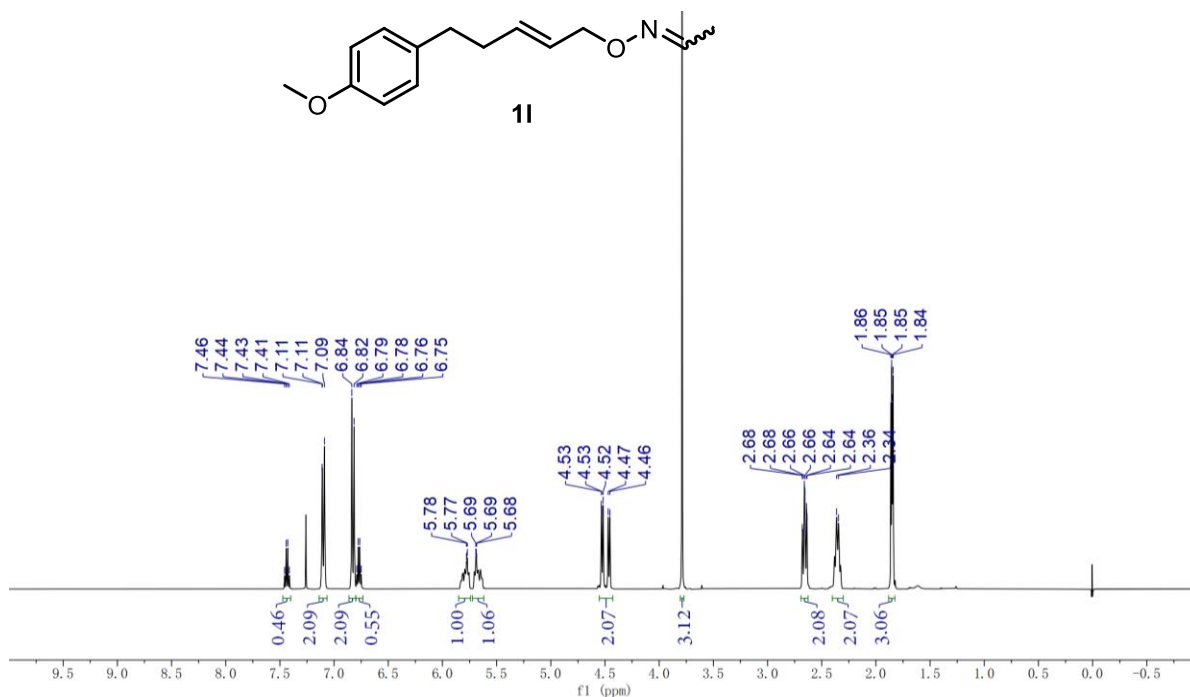

<sup>1</sup>H NMR spectrum of **11** was measured in CDCl<sub>3</sub> at 400 MHz

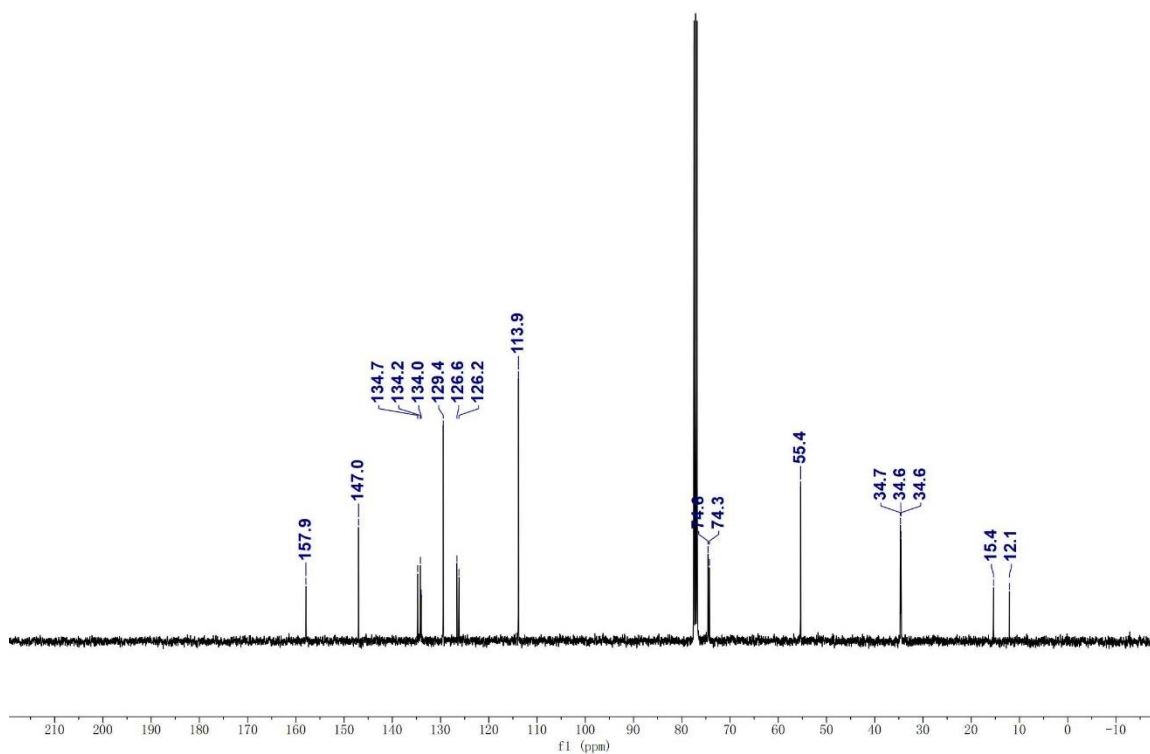

<sup>13</sup>C NMR spectrum of **11** was measured in CDCl<sub>3</sub> at 101 MHz

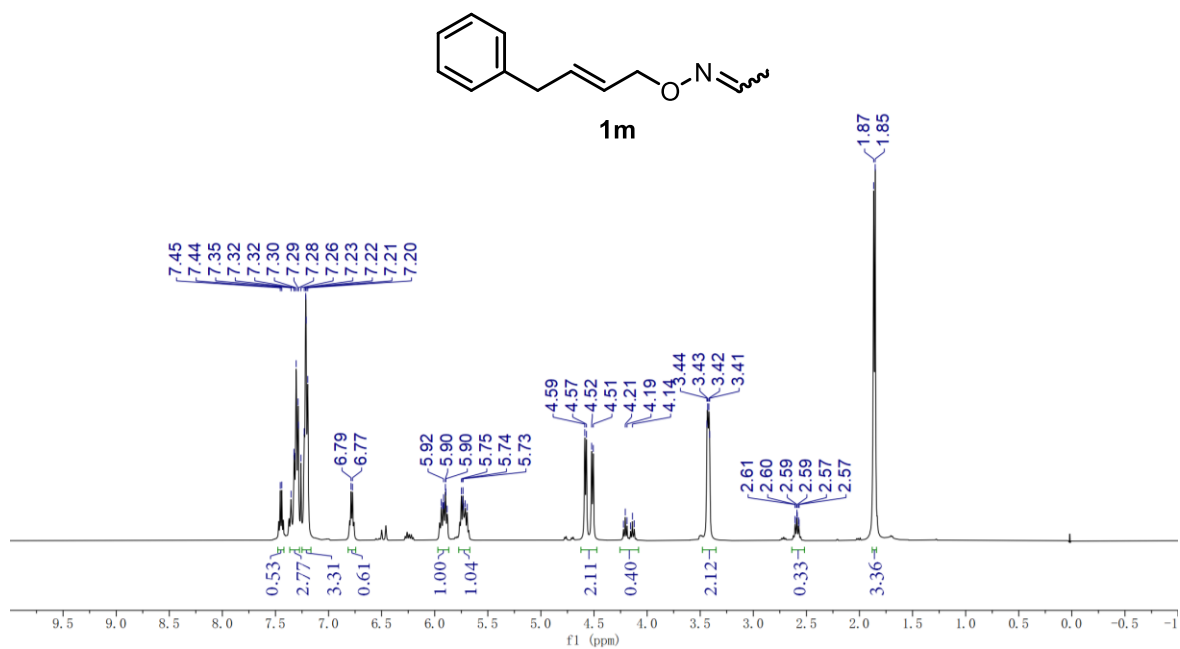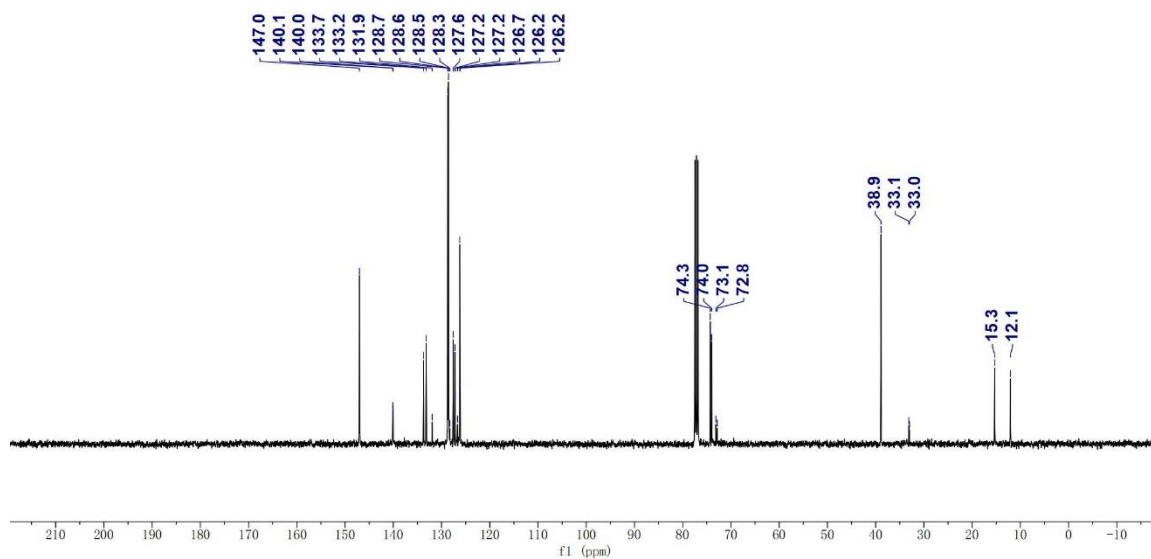

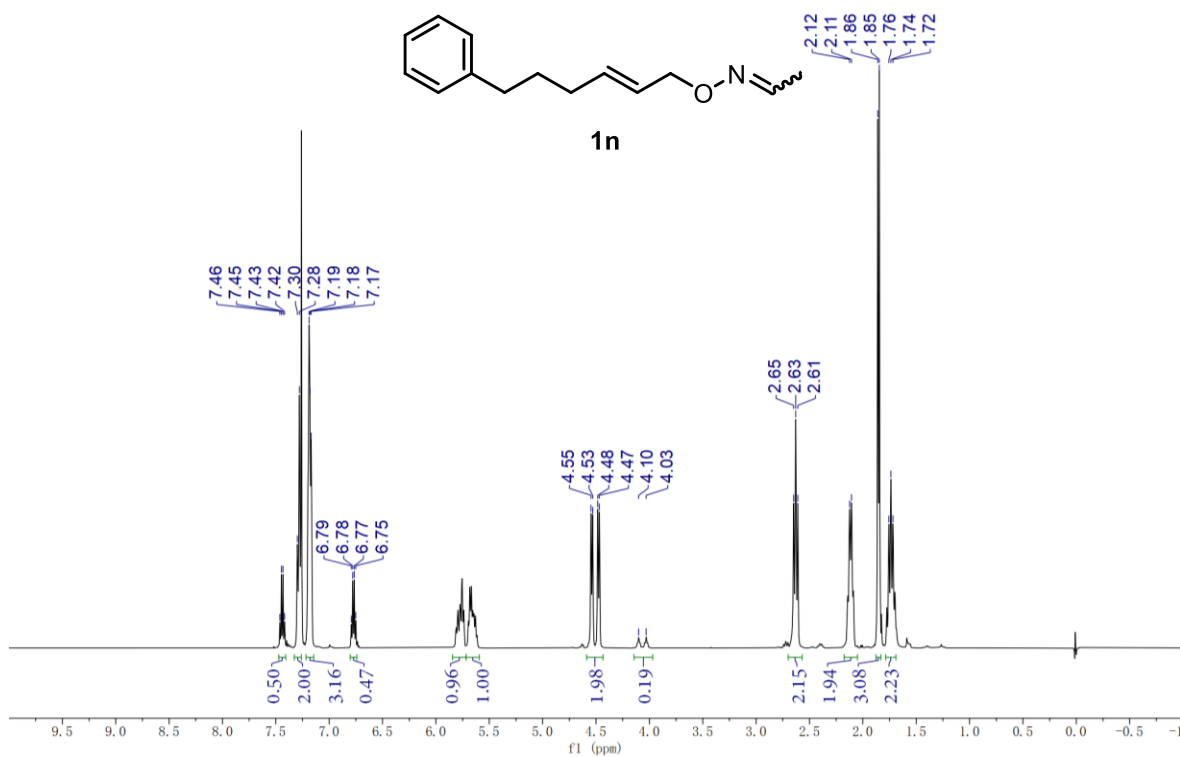

<sup>1</sup>H NMR spectrum of **1n** was measured in CDCl<sub>3</sub> at 400 MH

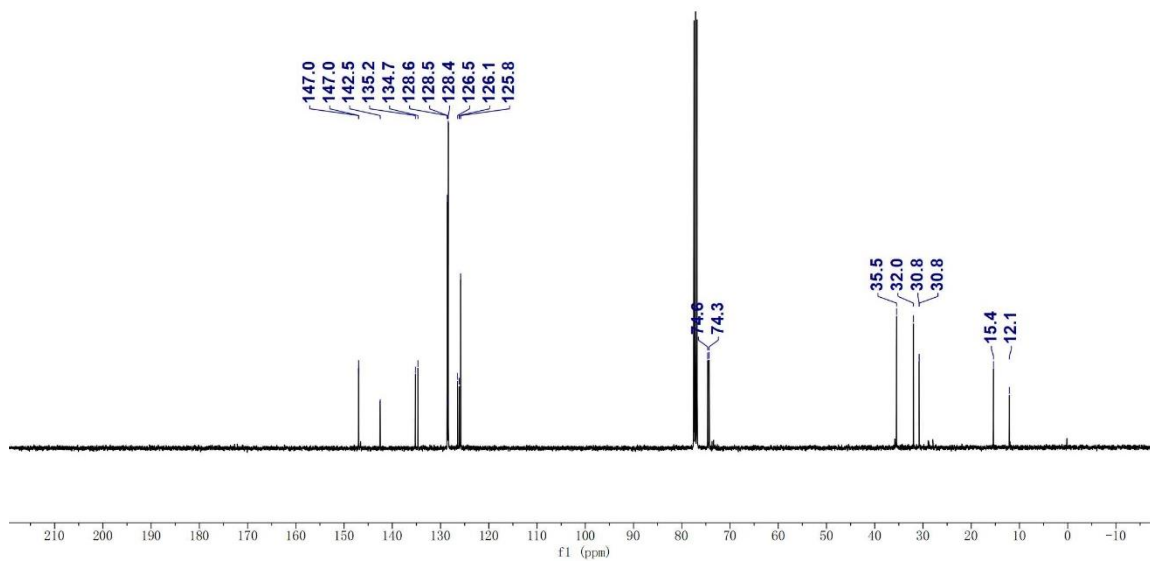

<sup>13</sup>C NMR spectrum of **1n** was measured in CDCl<sub>3</sub> at 101 MHz

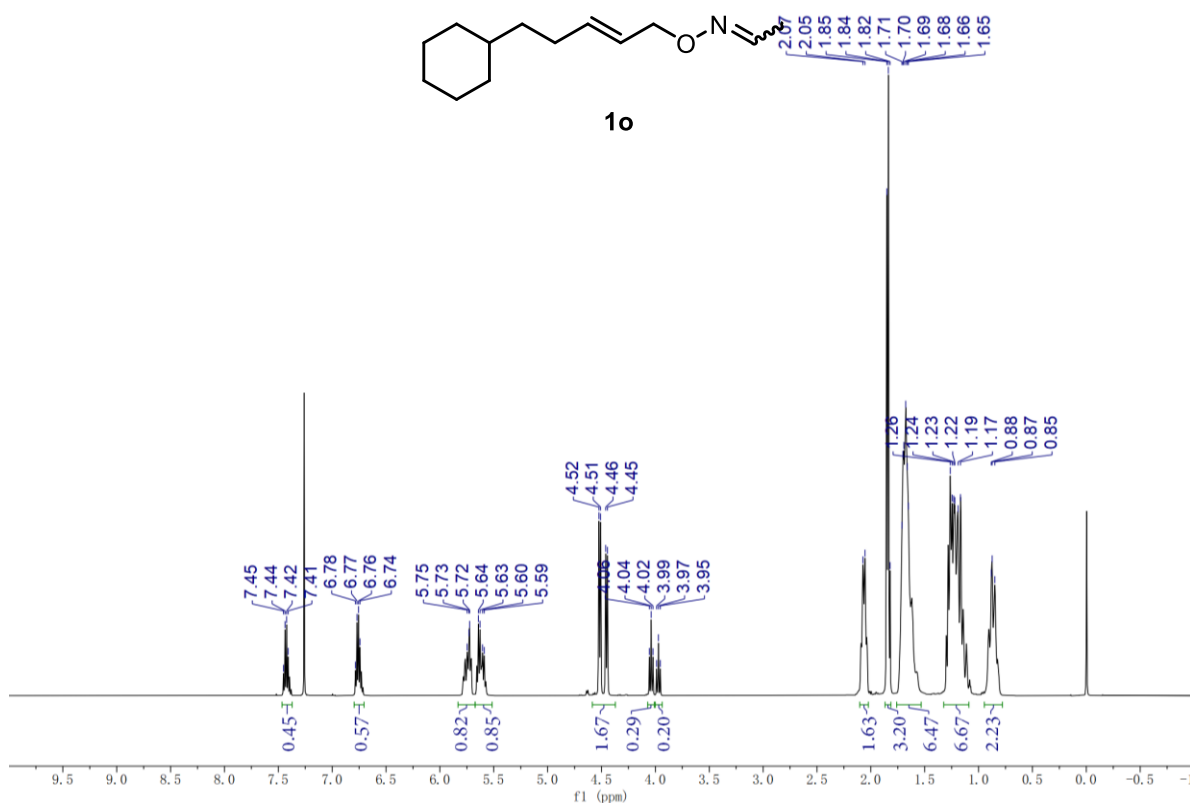

$^1\text{H}$  NMR spectrum of **1o** was measured in  $\text{CDCl}_3$  at 400 MHz

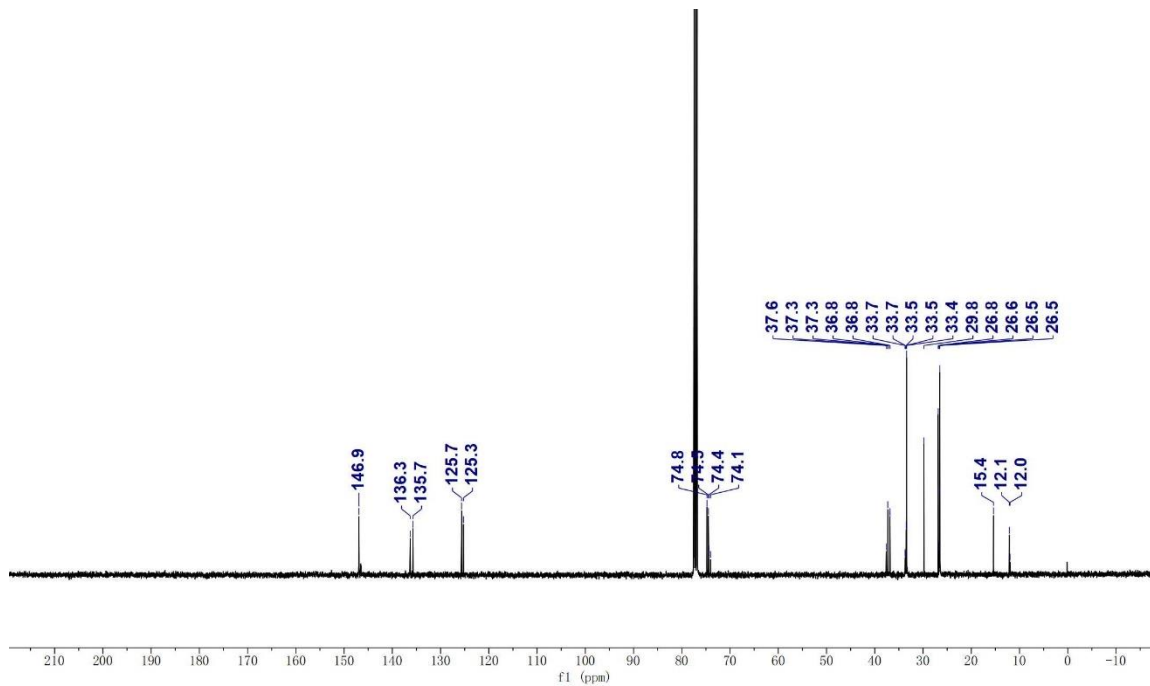

$^{13}\text{C}$  NMR spectrum of **1o** was measured in  $\text{CDCl}_3$  at 101 MHz

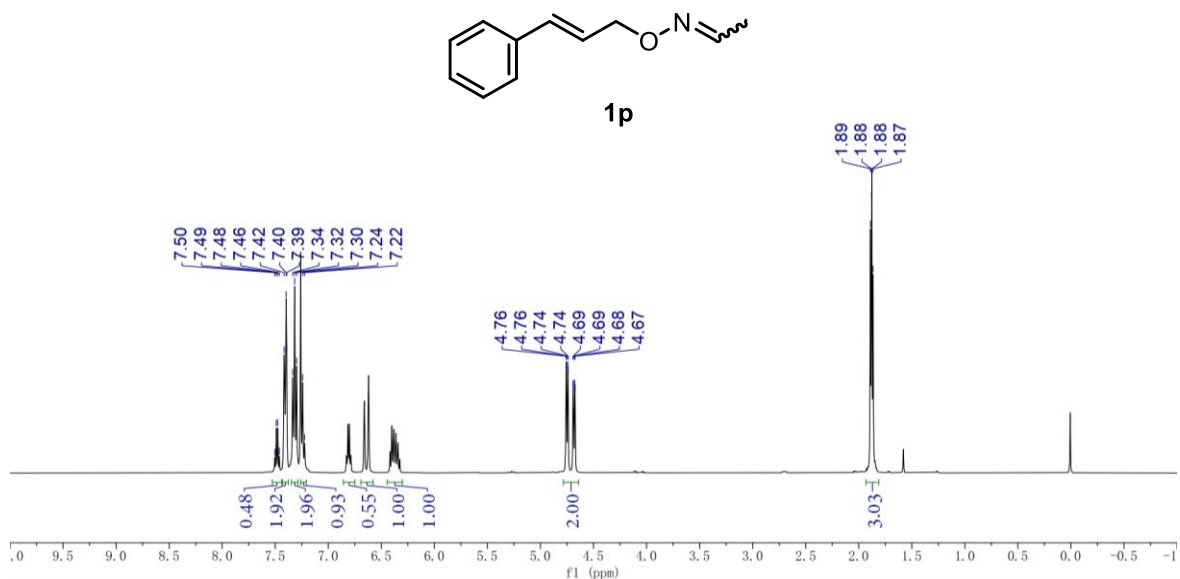

$^1\text{H}$  NMR spectrum of **1p** was measured in  $\text{CDCl}_3$  at 400 MHz

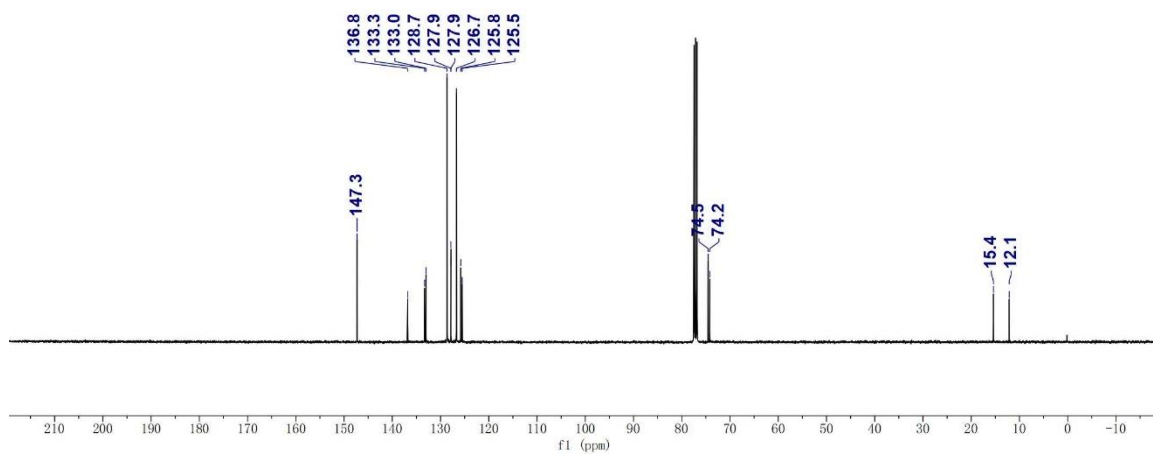

$^{13}\text{C}$  NMR spectrum of **1p** was measured in  $\text{CDCl}_3$  at 101 MHz

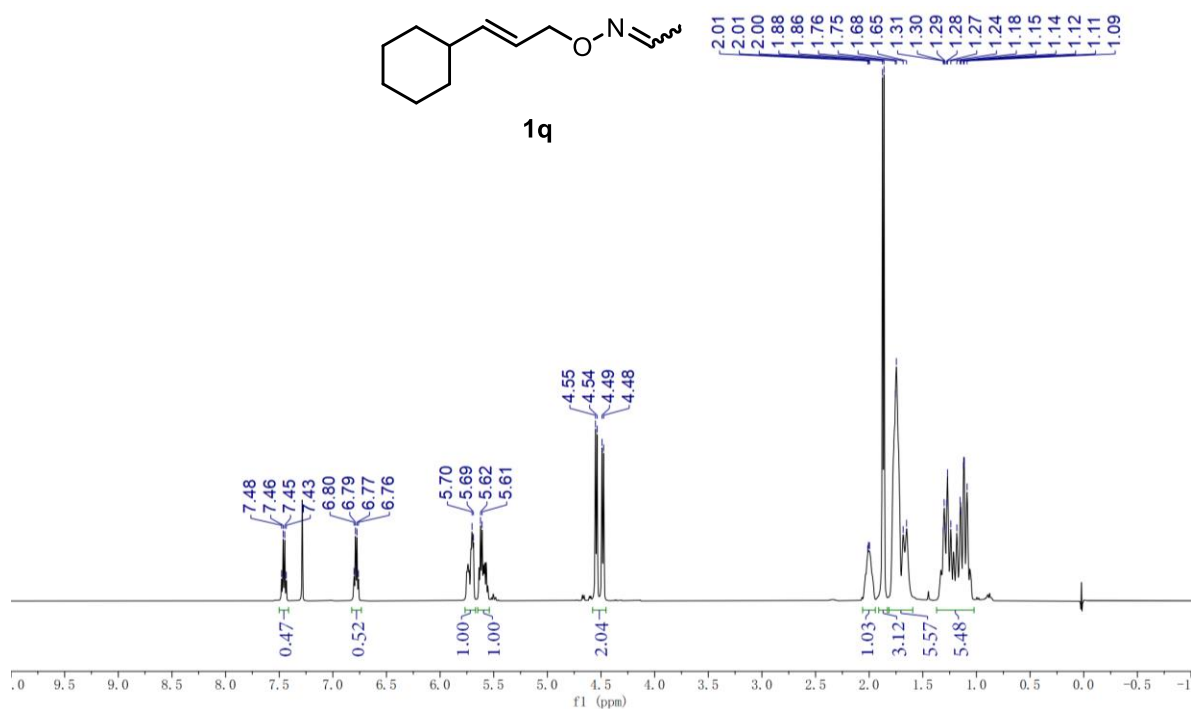

$^1\text{H}$  NMR spectrum of **1q** was measured in  $\text{CDCl}_3$  at 400 MHz

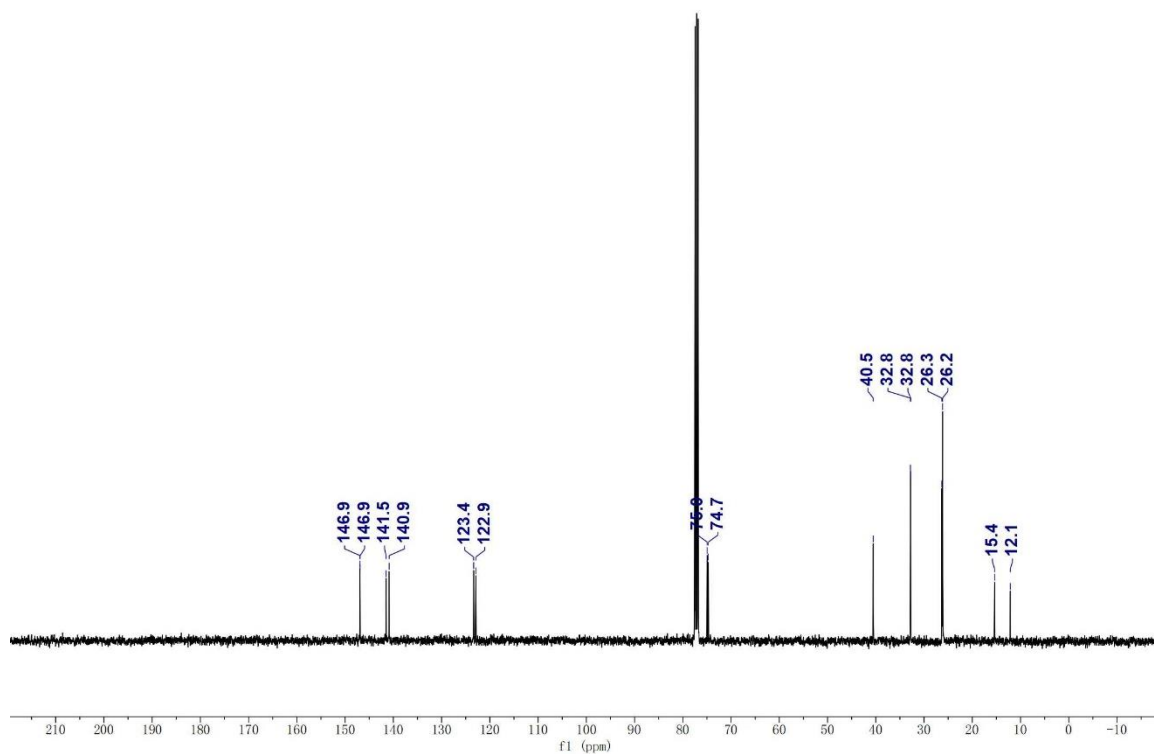

$^{13}\text{C}$  NMR spectrum of **1q** was measured in  $\text{CDCl}_3$  at 101 MHz

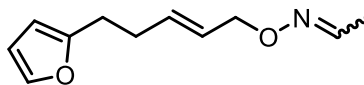

**1r**

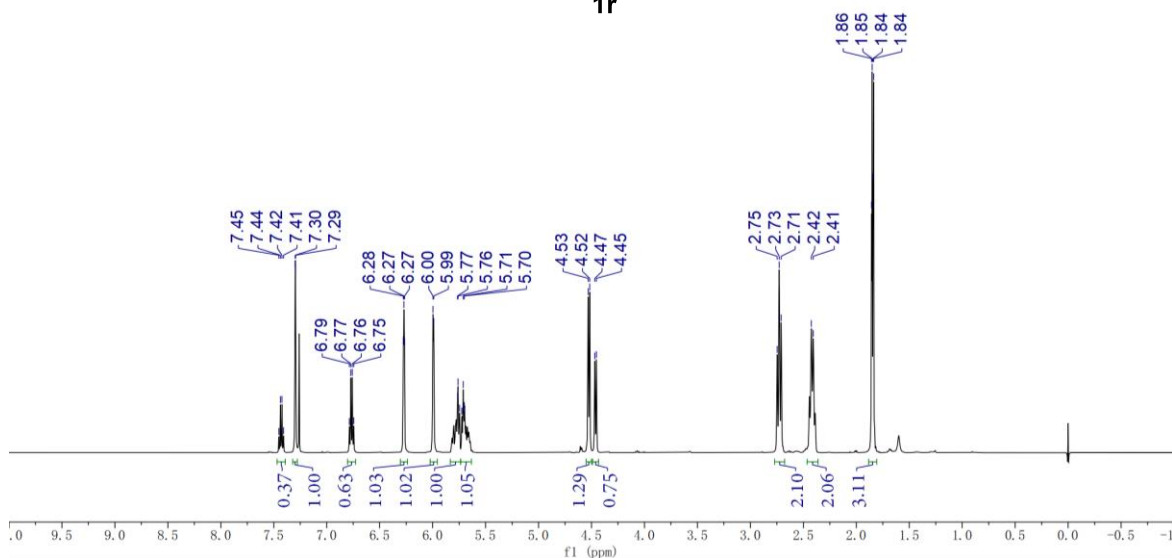

<sup>1</sup>H NMR spectrum of **1r** was measured in CDCl<sub>3</sub> at 400 MH

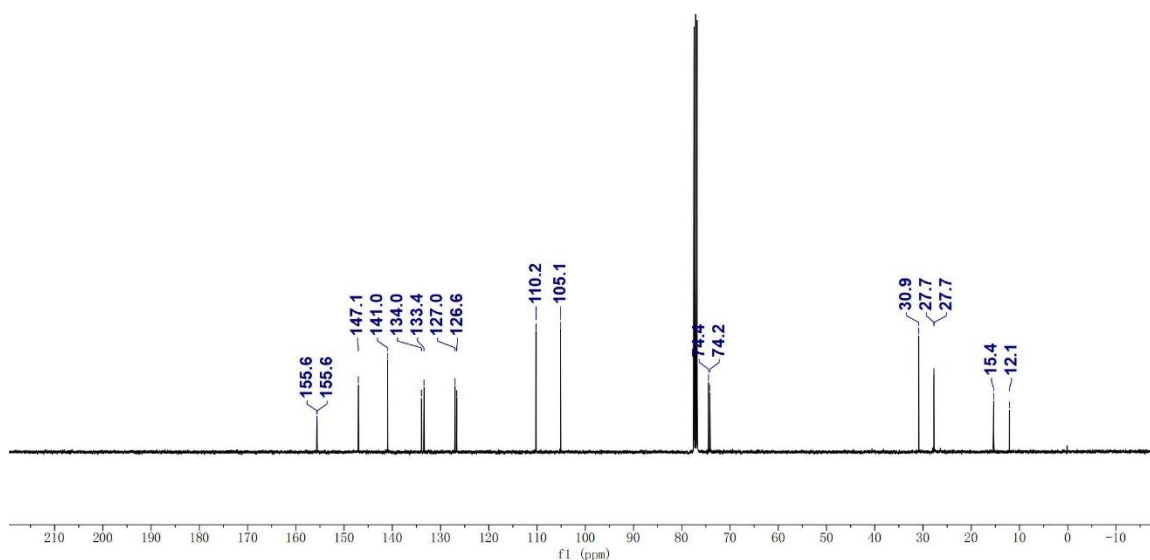

<sup>13</sup>C NMR spectrum of **1r** was measured in CDCl<sub>3</sub> at 101 MHz



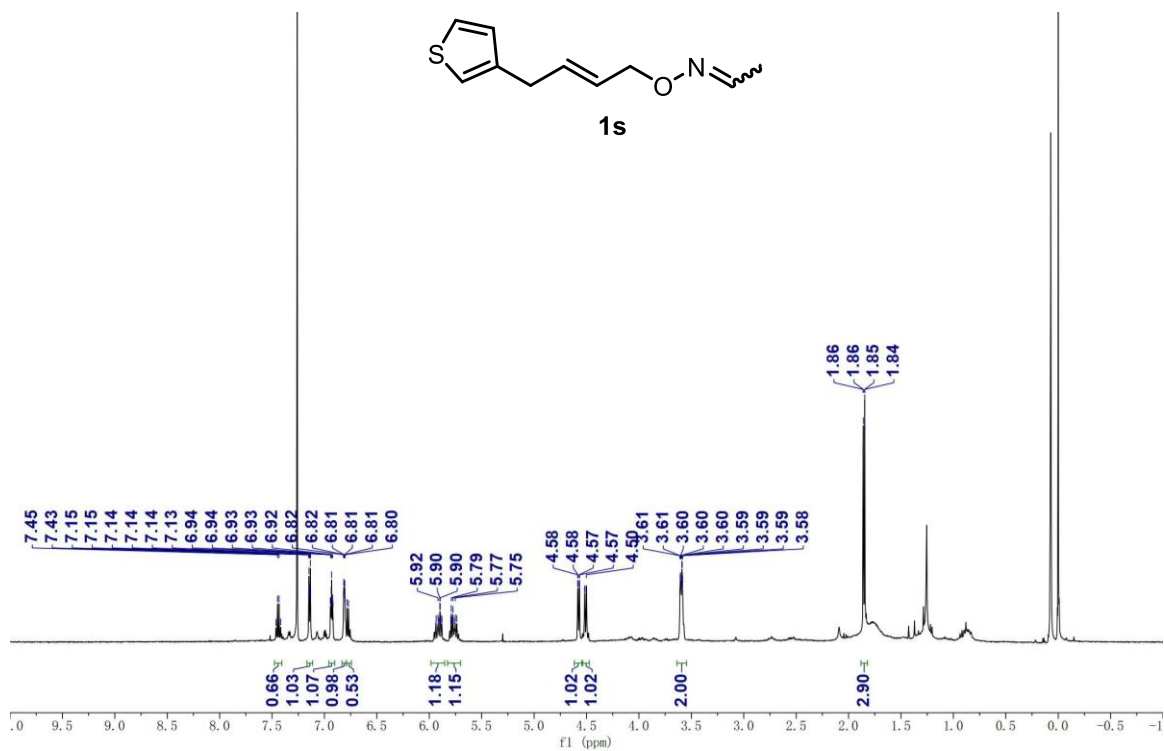

<sup>1</sup>H NMR spectrum of **1s** was measured in CDCl<sub>3</sub> at 400 MH

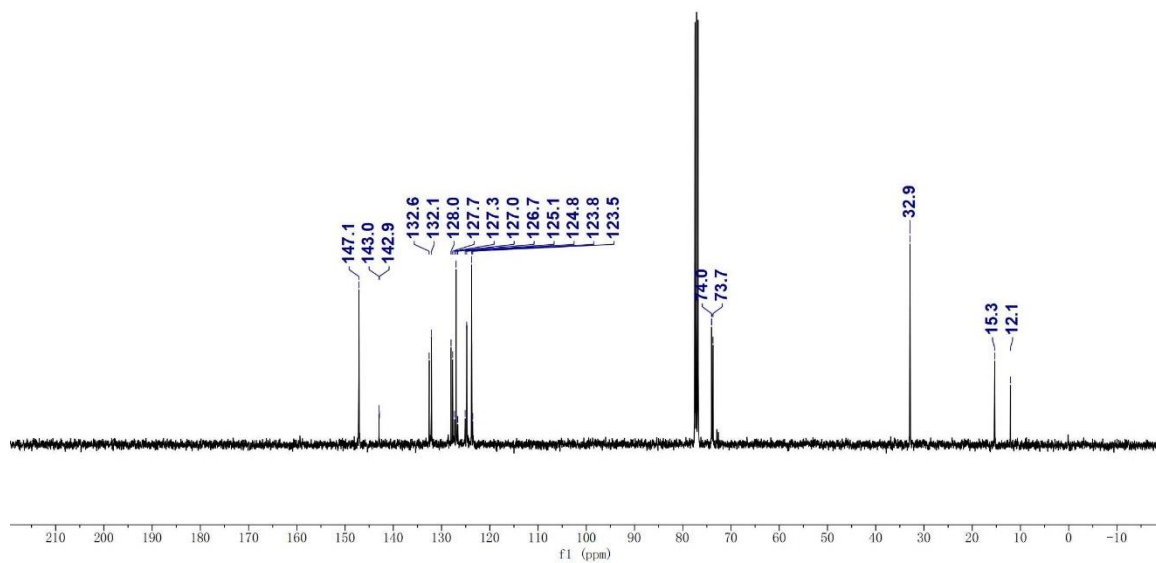

<sup>13</sup>C NMR spectrum of **1s** was measured in CDCl<sub>3</sub> at 101 MHz

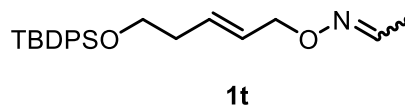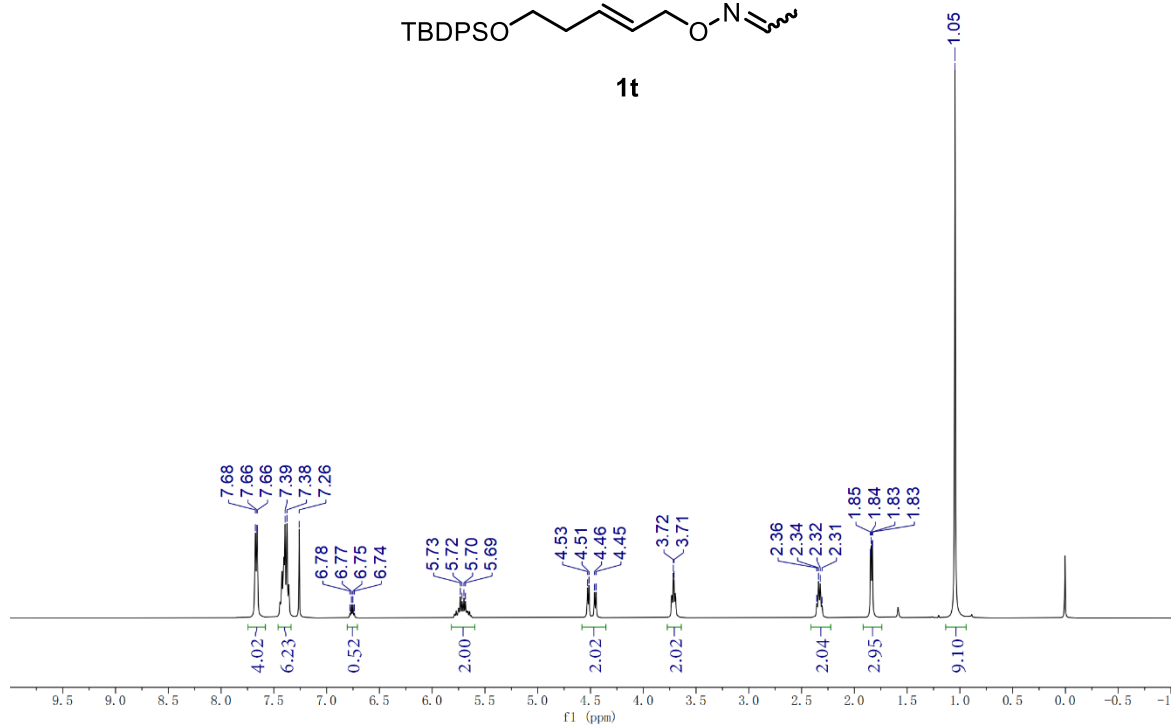

<sup>1</sup>H NMR spectrum of **1t** was measured in CDCl<sub>3</sub> at 400 MHz

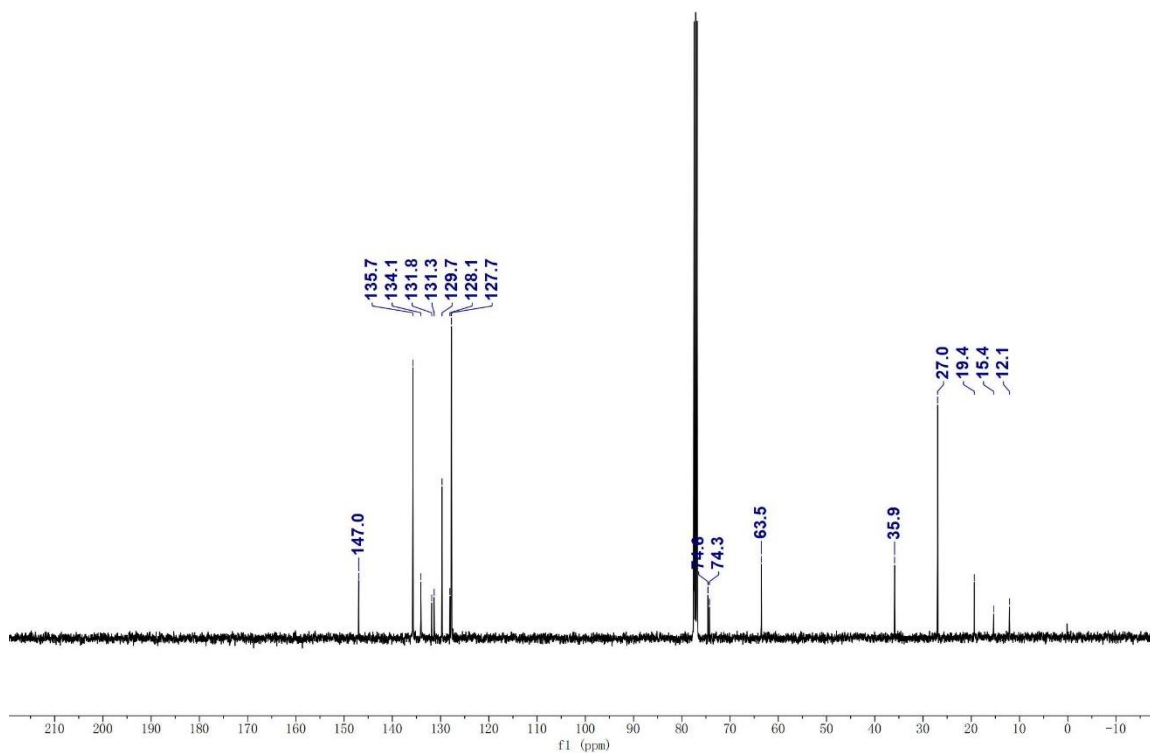

<sup>13</sup>C NMR spectrum of **1t** was measured in CDCl<sub>3</sub> at 101 MHz

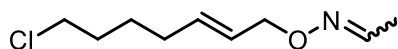

**1u**

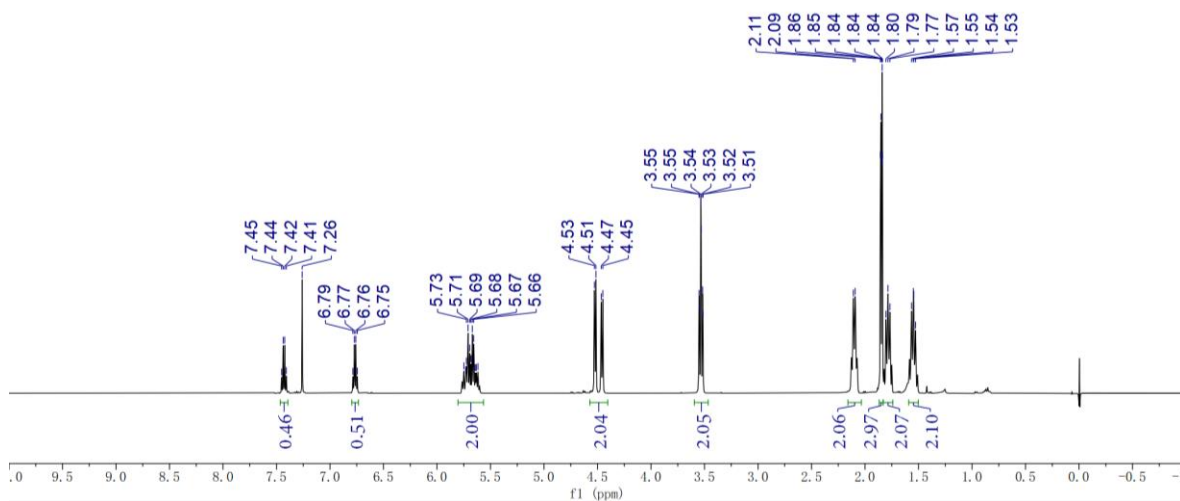

<sup>1</sup>H NMR spectrum of **1u** was measured in CDCl<sub>3</sub> at 400 MHz

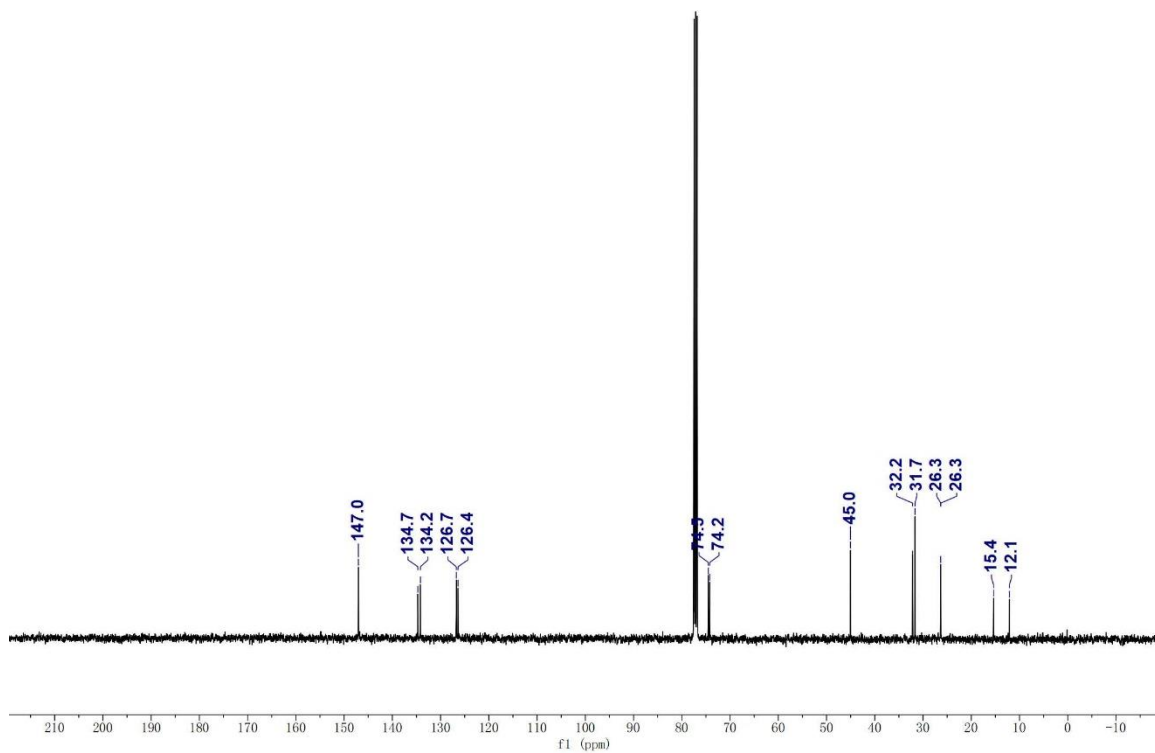

<sup>13</sup>C NMR spectrum of **1u** was measured in CDCl<sub>3</sub> at 101 MHz

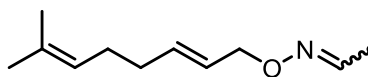

**1v**

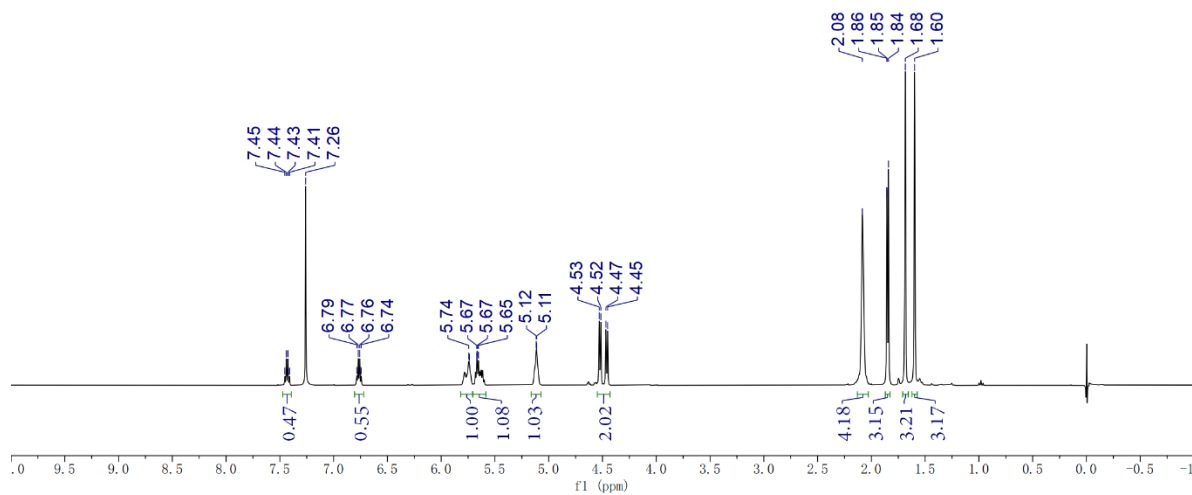

<sup>1</sup>H NMR spectrum of **1v** was measured in CDCl<sub>3</sub> at 400 MHz

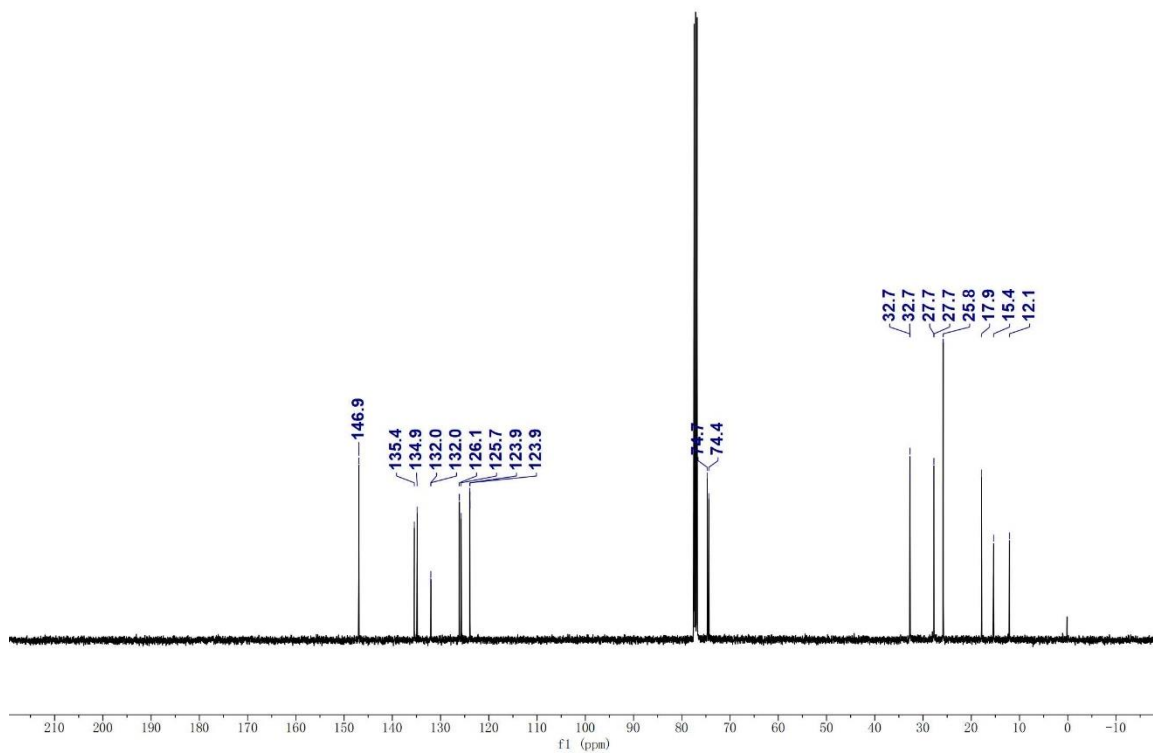

<sup>13</sup>C NMR spectrum of **1v** was measured in CDCl<sub>3</sub> at 101 MHz

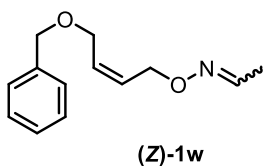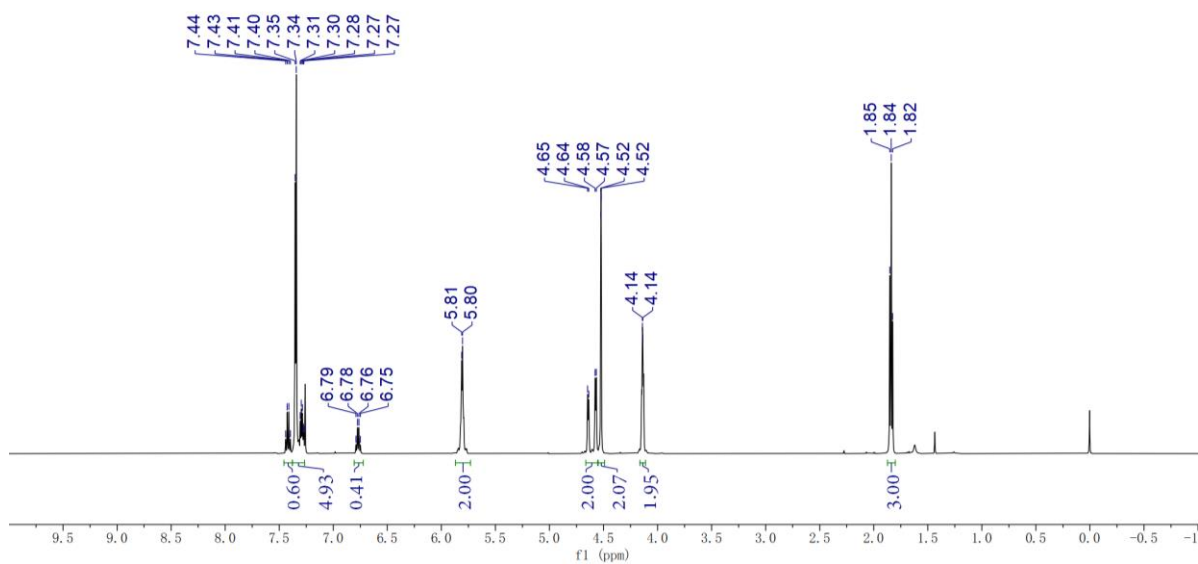

<sup>1</sup>H NMR spectrum of **(Z)-1w** was measured in CDCl<sub>3</sub> at 400 MHz

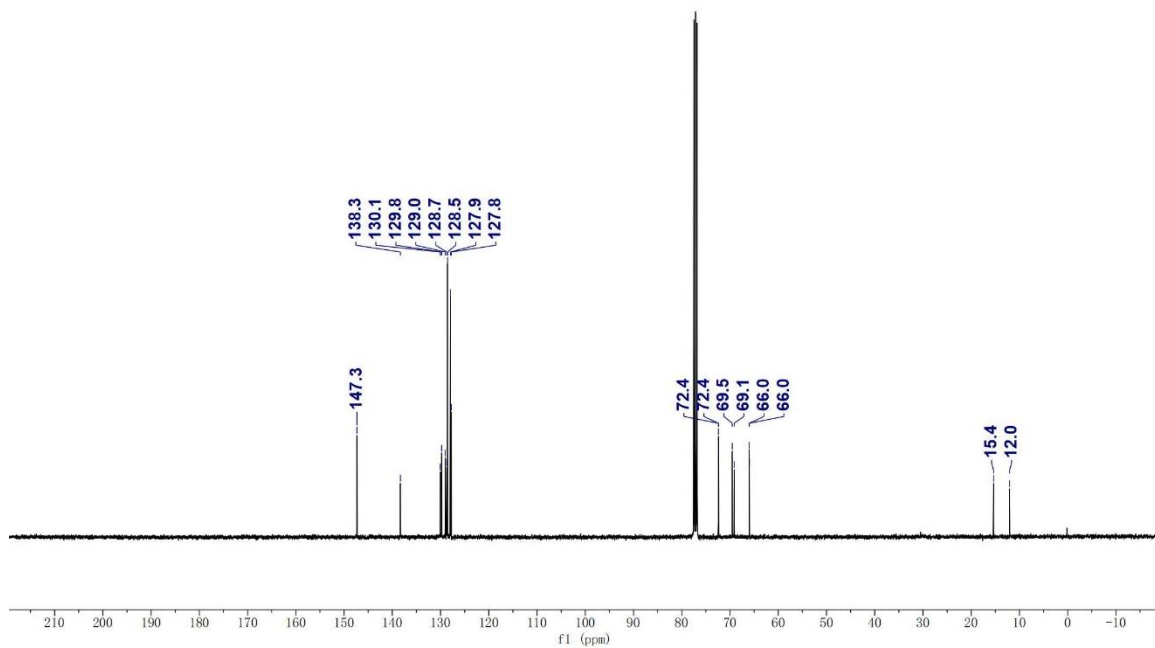

<sup>13</sup>C NMR spectrum of **(Z)-1w** was measured in CDCl<sub>3</sub> at 101 MHz

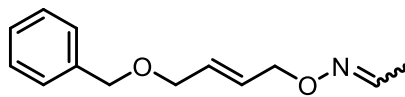

(*E*)-1w

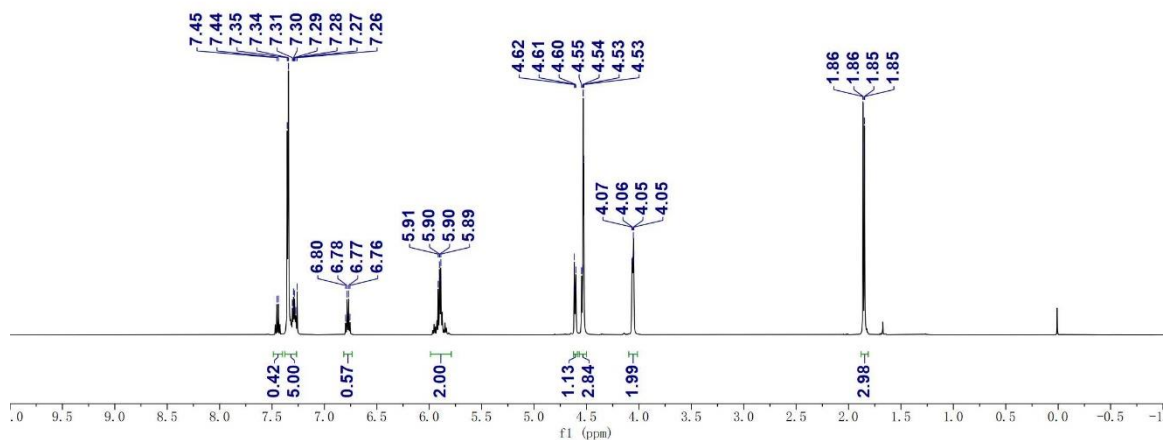

<sup>1</sup>H NMR spectrum of (*E*)-1w was measured in CDCl<sub>3</sub> at 400 MHz

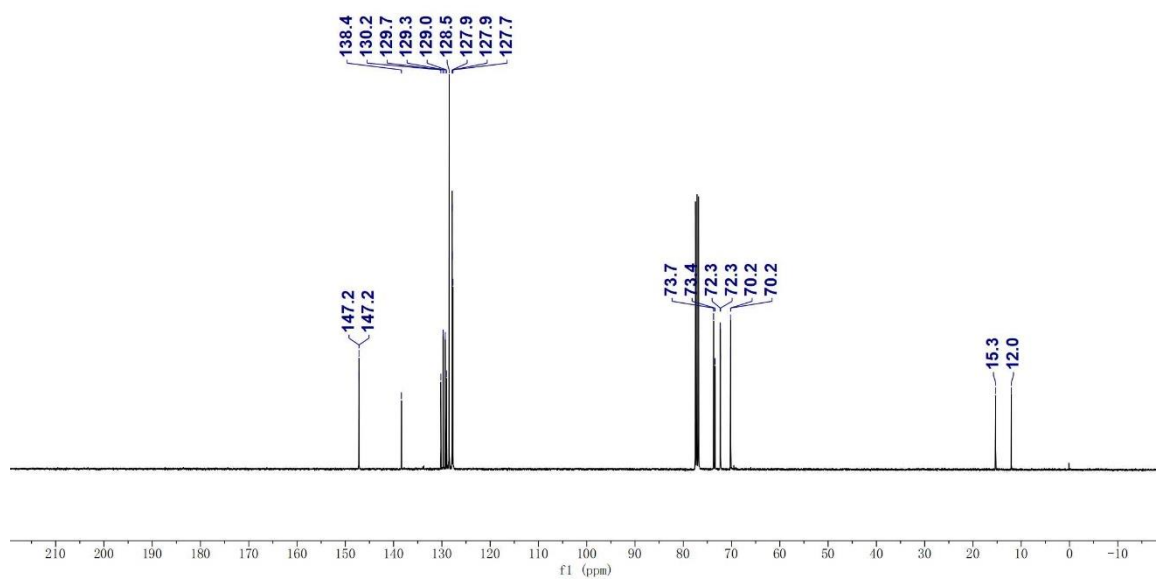

<sup>13</sup>C NMR spectrum of (*E*)-1w was measured in CDCl<sub>3</sub> at 101 MHz

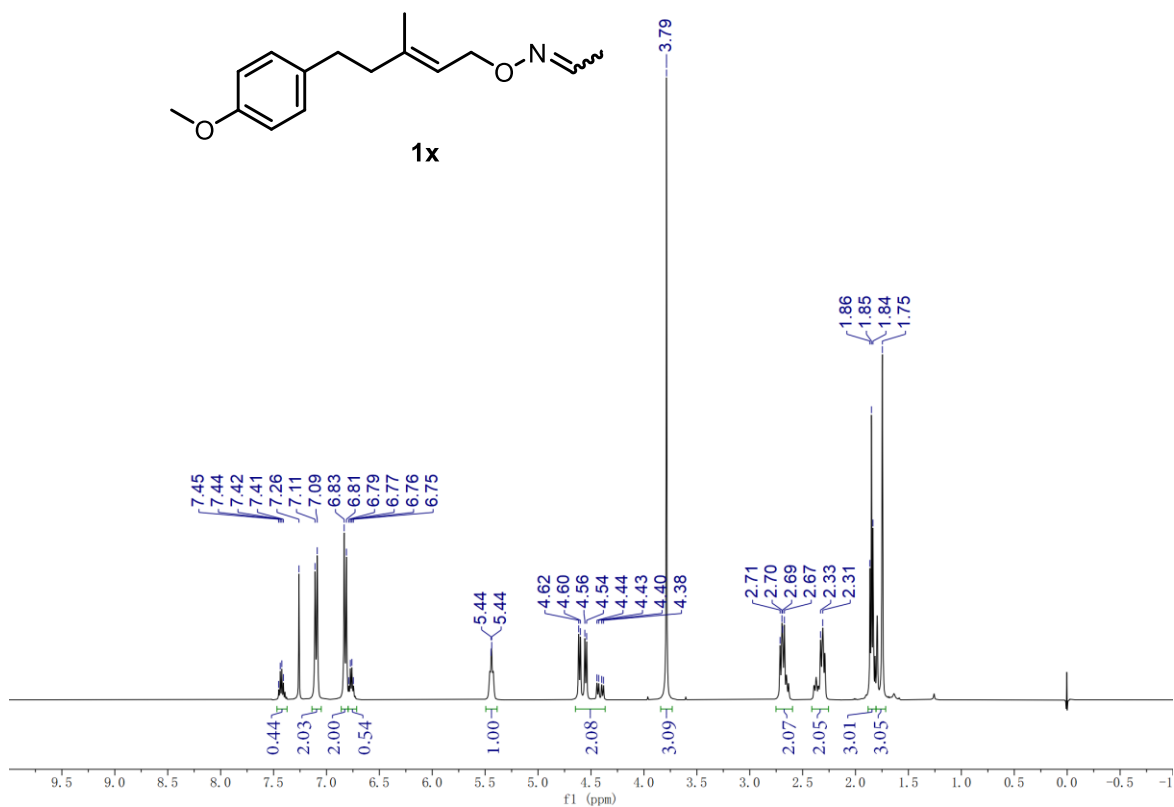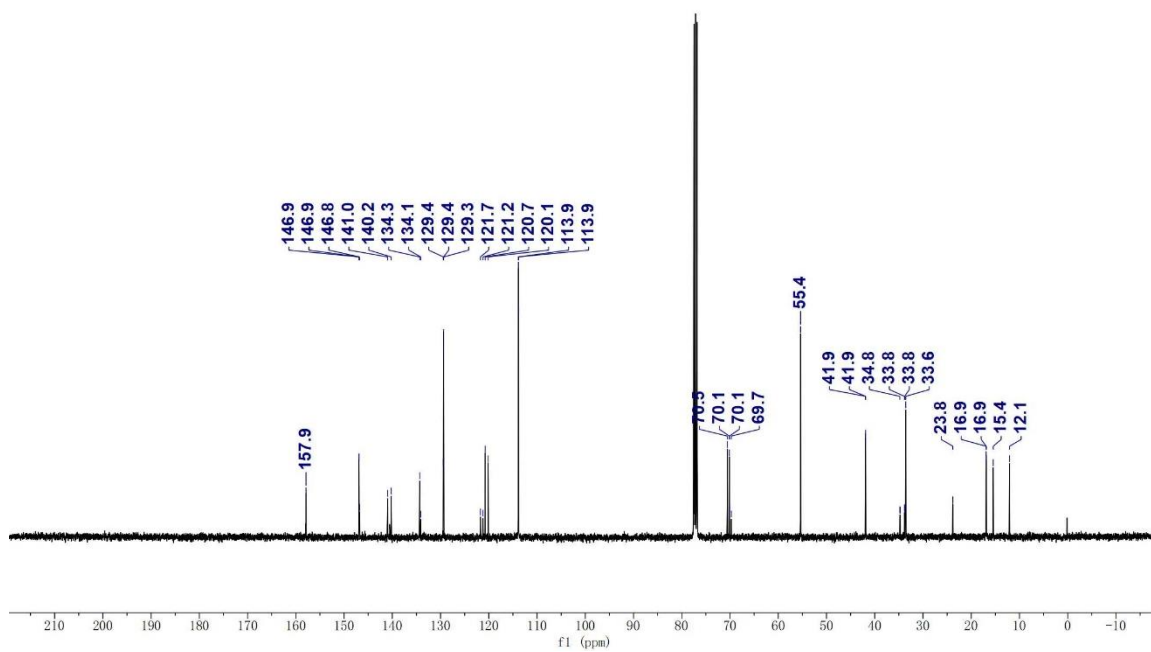

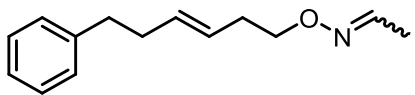

**1y**

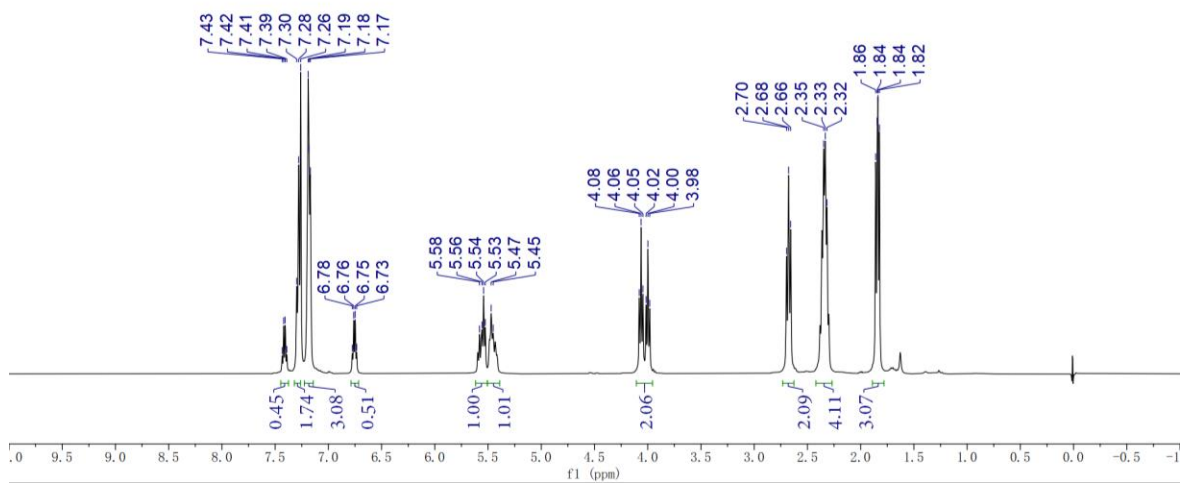

<sup>1</sup>H NMR spectrum of **1y** was measured in CDCl<sub>3</sub> at 400 MH

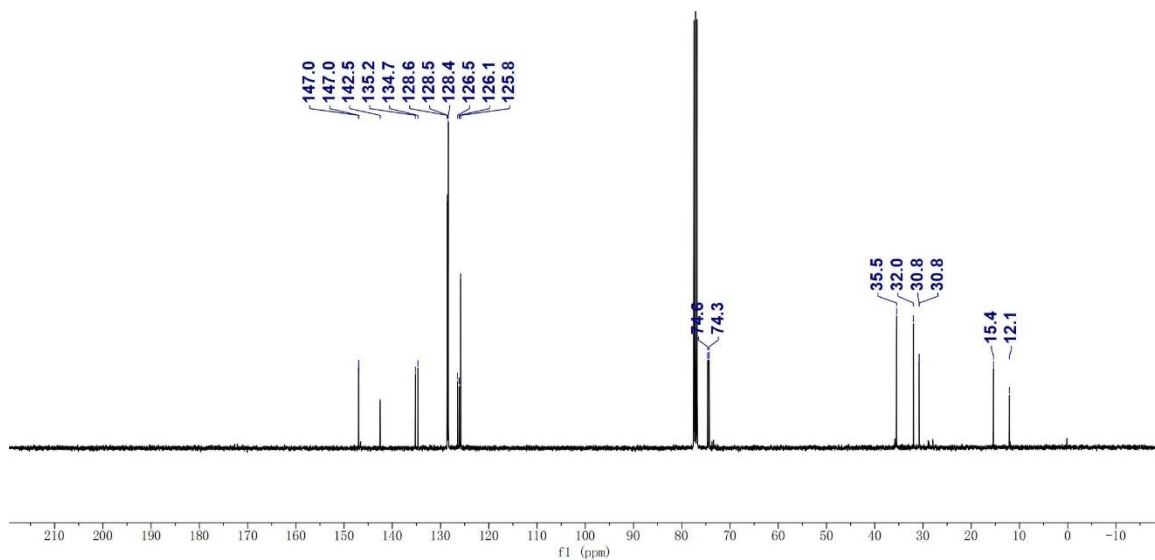

<sup>13</sup>C NMR spectrum of **1y** was measured in CDCl<sub>3</sub> at 101 MHz



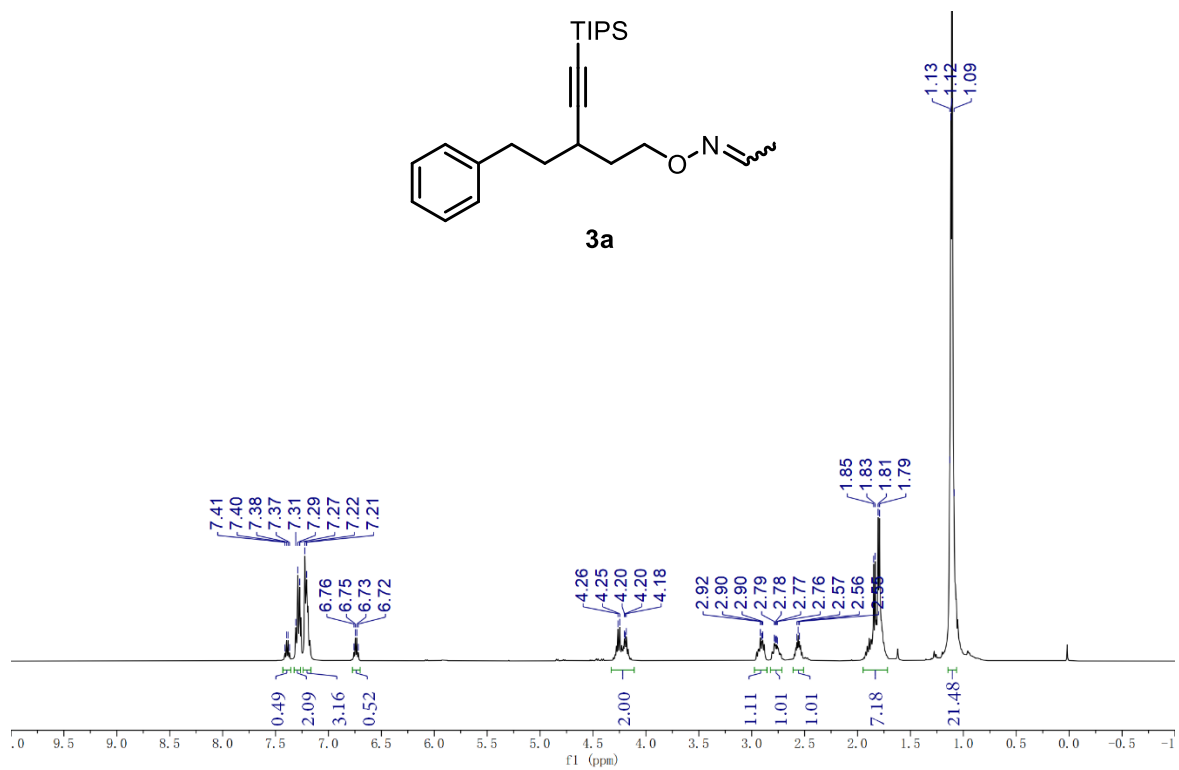

<sup>1</sup>H NMR spectrum of **3a** was measured in CDCl<sub>3</sub> at 400 MHz

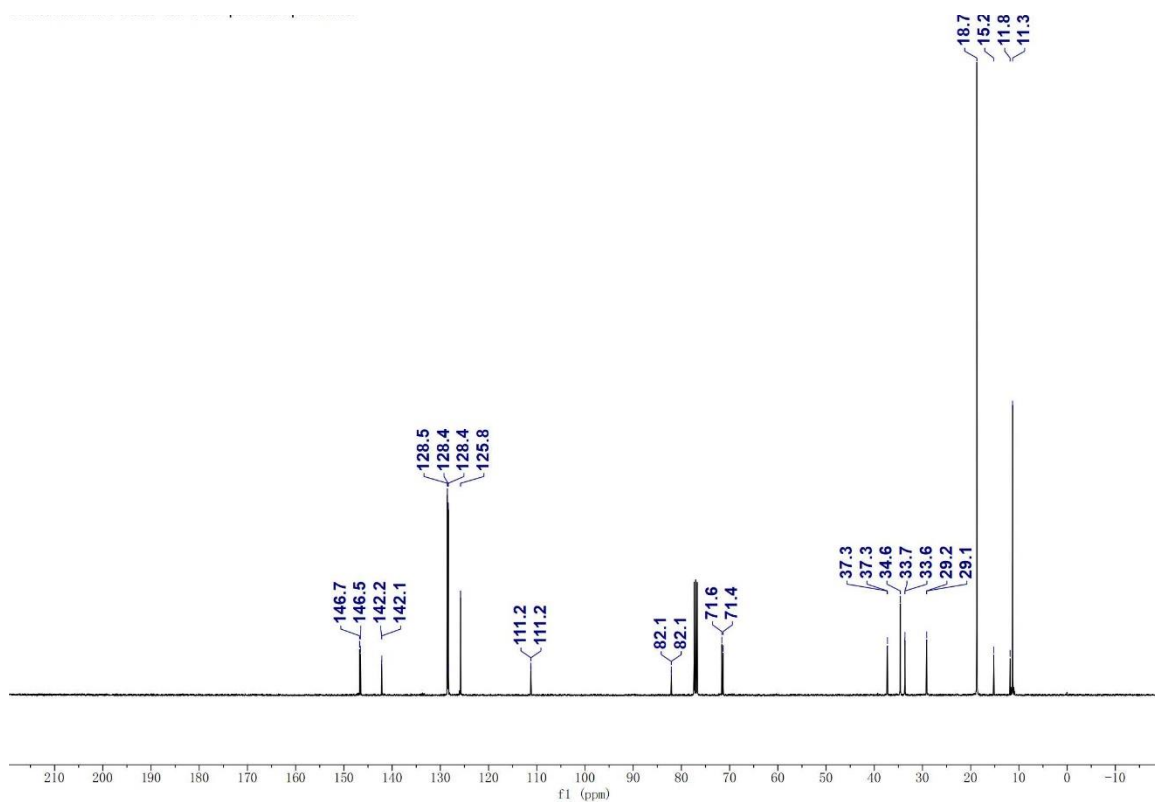

<sup>13</sup>C NMR spectrum of **3a** was measured in CDCl<sub>3</sub> at 101 MHz

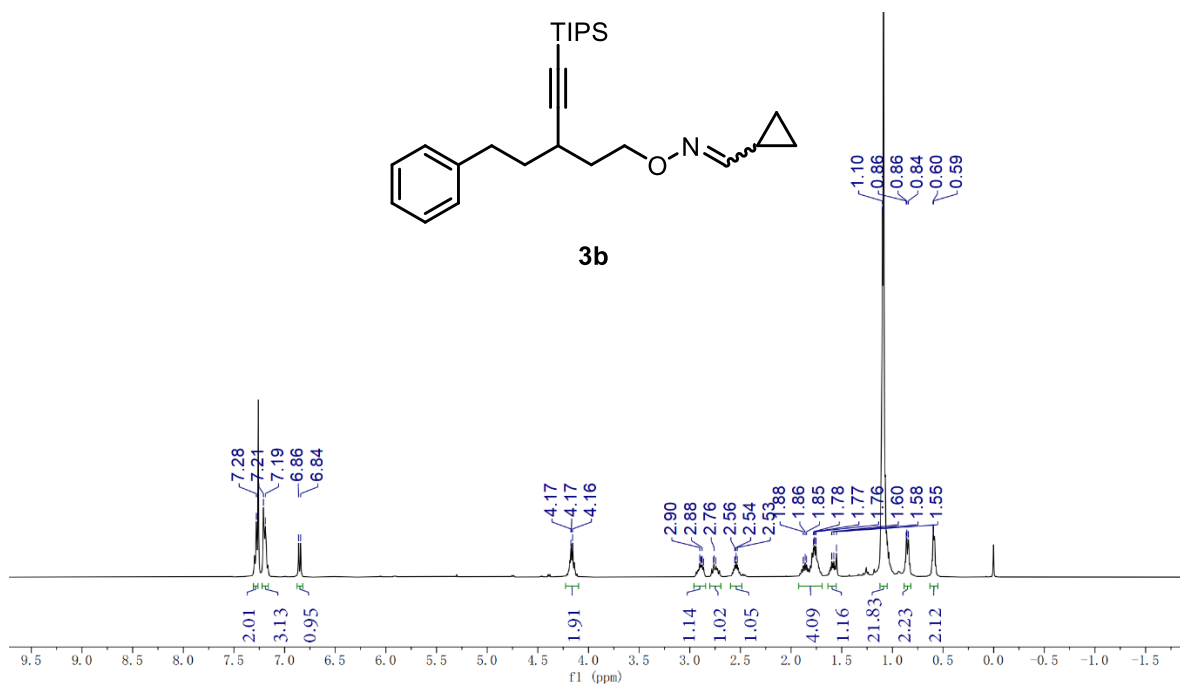

<sup>1</sup>H NMR spectrum of **3b** was measured in CDCl<sub>3</sub> at 400 MH

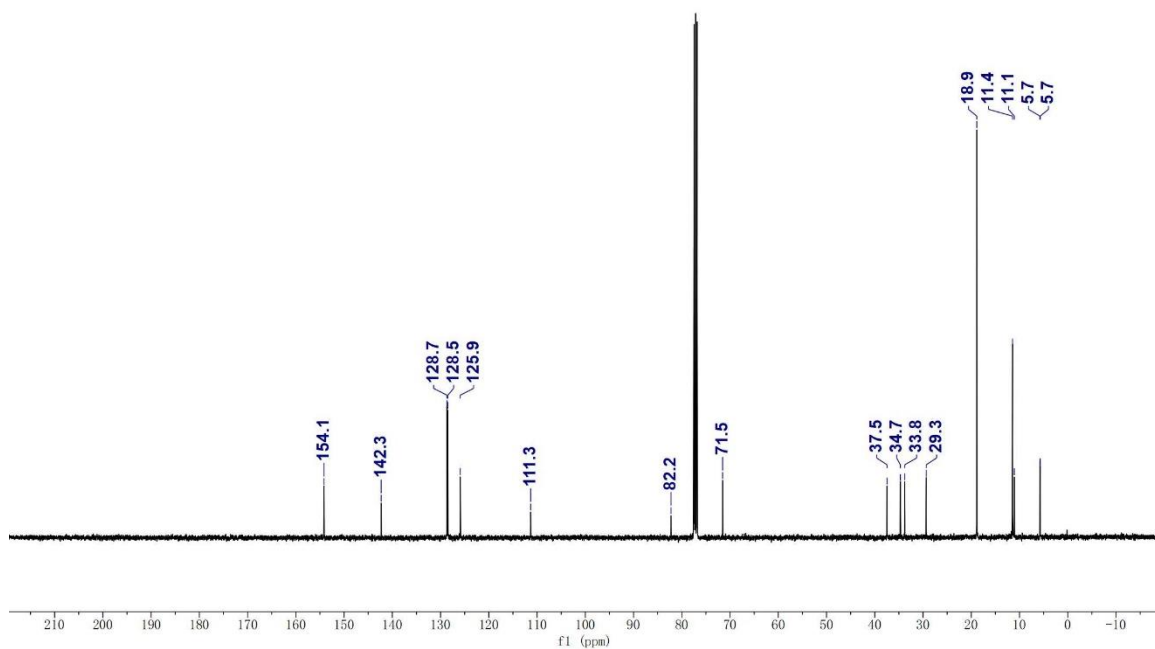

<sup>13</sup>C NMR spectrum of **3b** was measured in CDCl<sub>3</sub> at 101 MHz

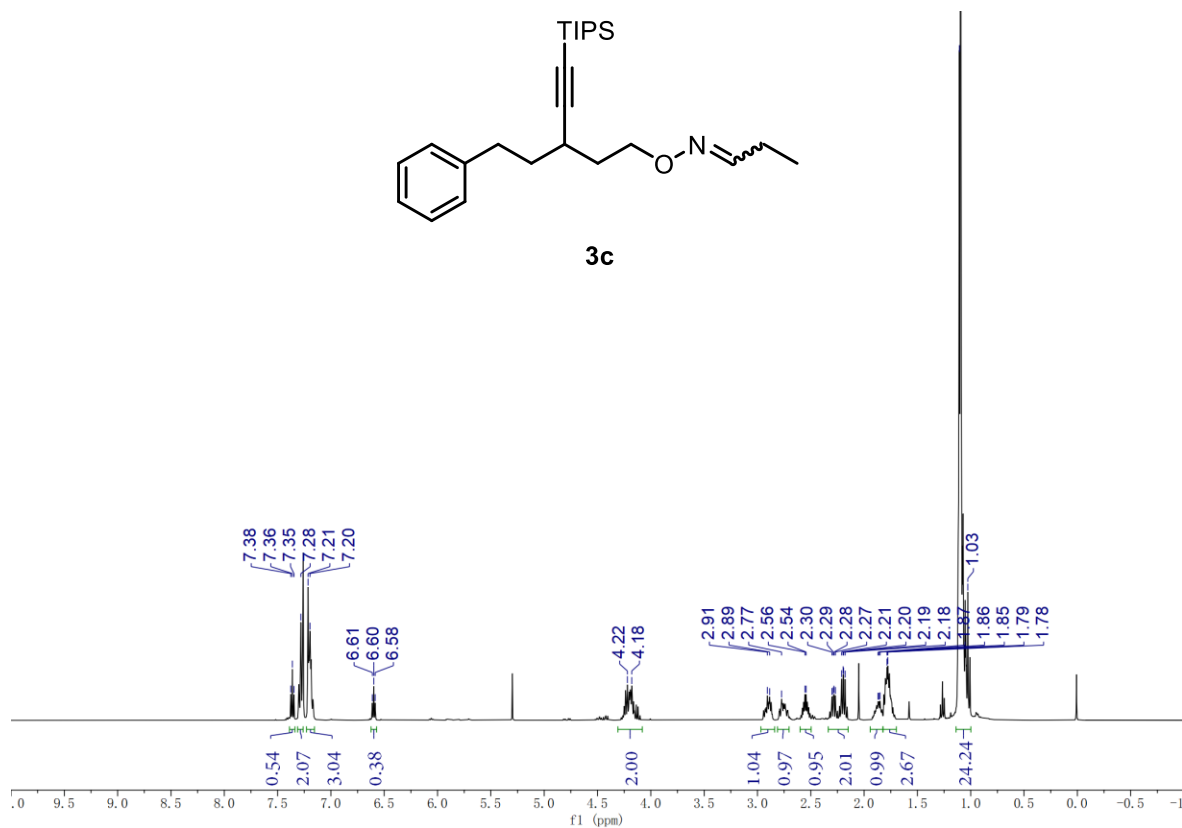

<sup>1</sup>H NMR spectrum of **3c** was measured in CDCl<sub>3</sub> at 400 MHz

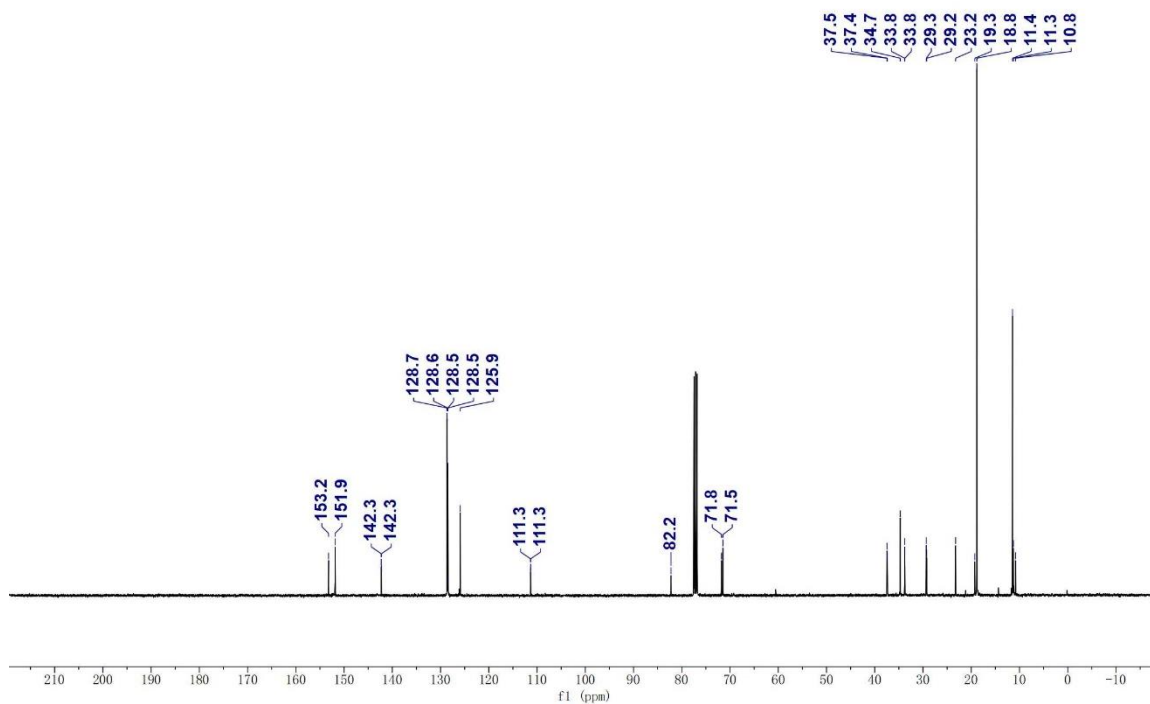

<sup>13</sup>C NMR spectrum of **3c** was measured in CDCl<sub>3</sub> at 101 MHz

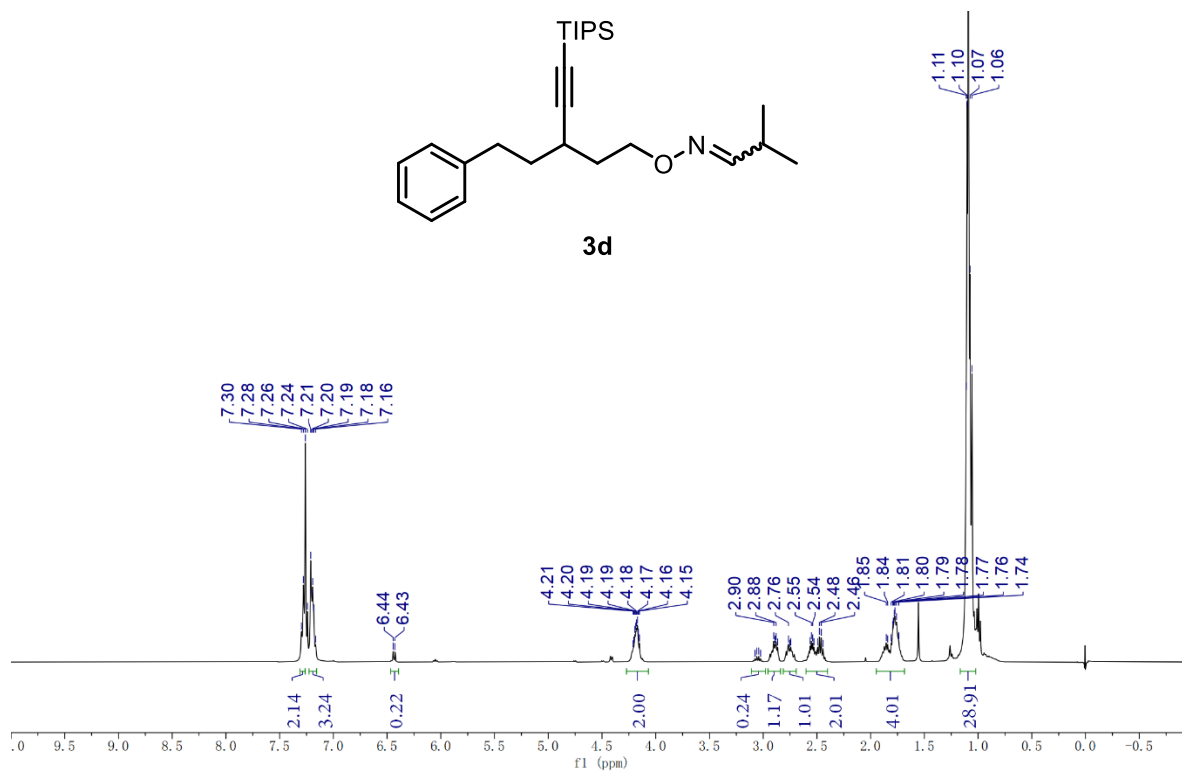

<sup>1</sup>H NMR spectrum of **3d** was measured in CDCl<sub>3</sub> at 400 MHz

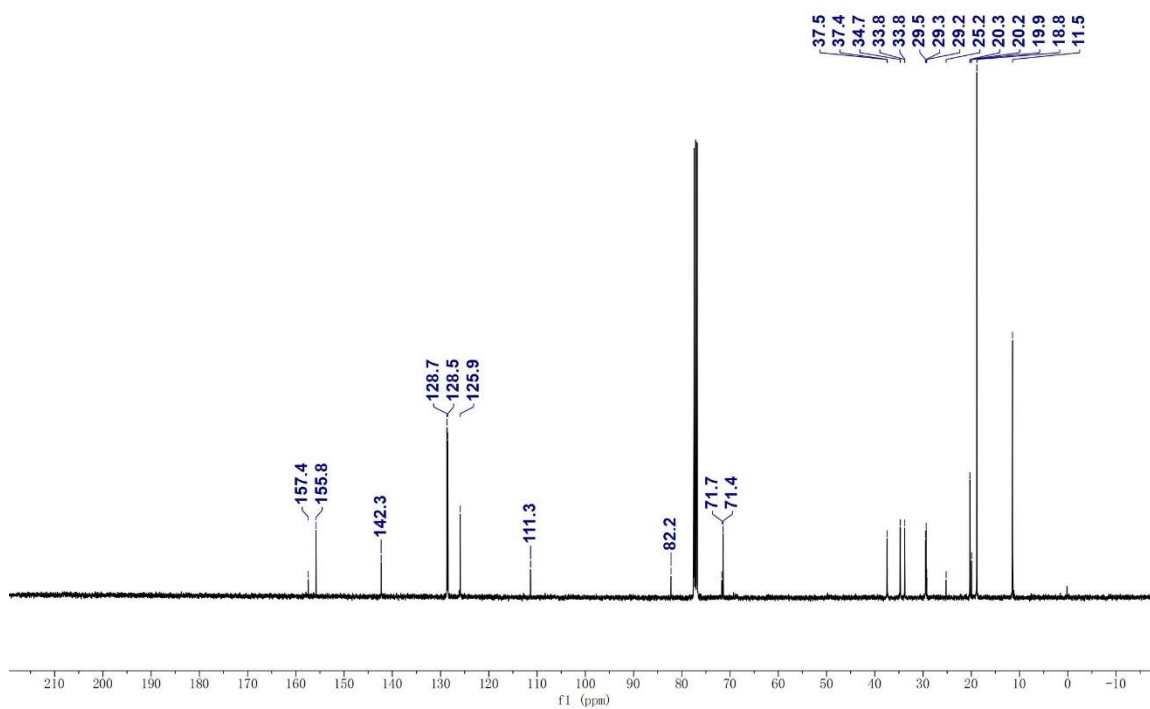

<sup>13</sup>C NMR spectrum of **3d** was measured in CDCl<sub>3</sub> at 101 MHz

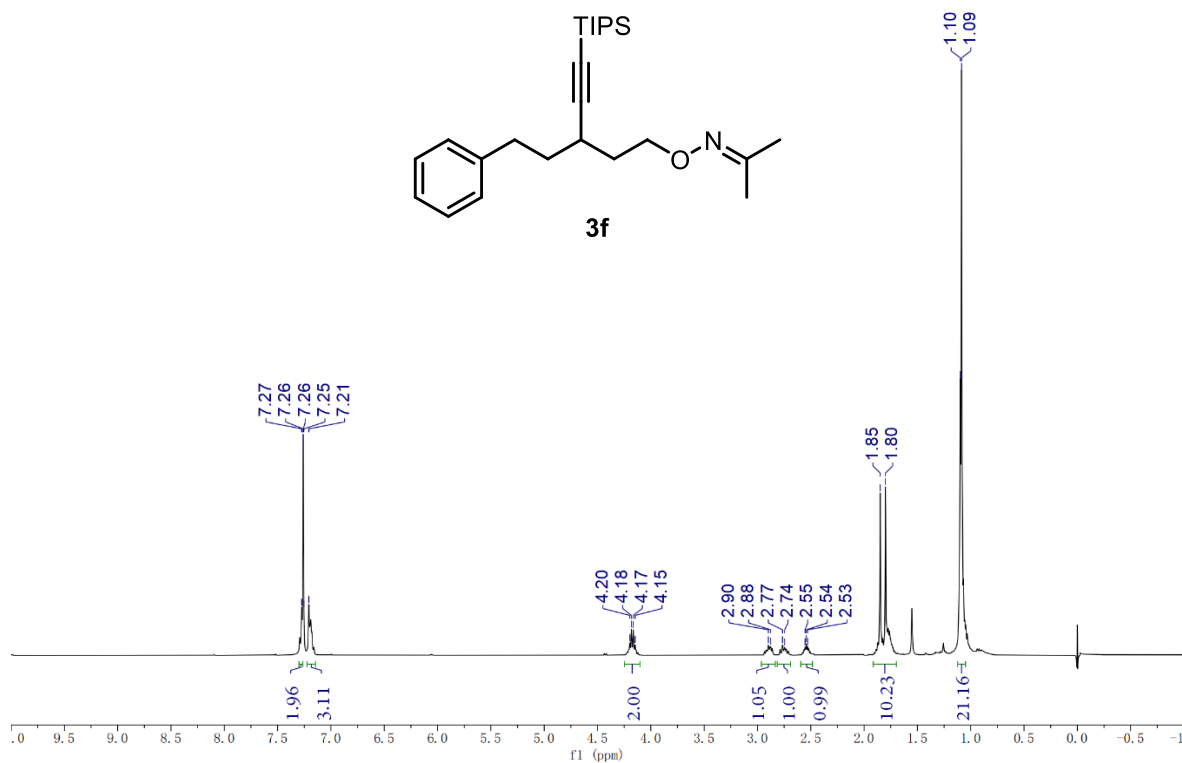

$^1\text{H}$  NMR spectrum of **3f** was measured in  $\text{CDCl}_3$  at 400 MHz

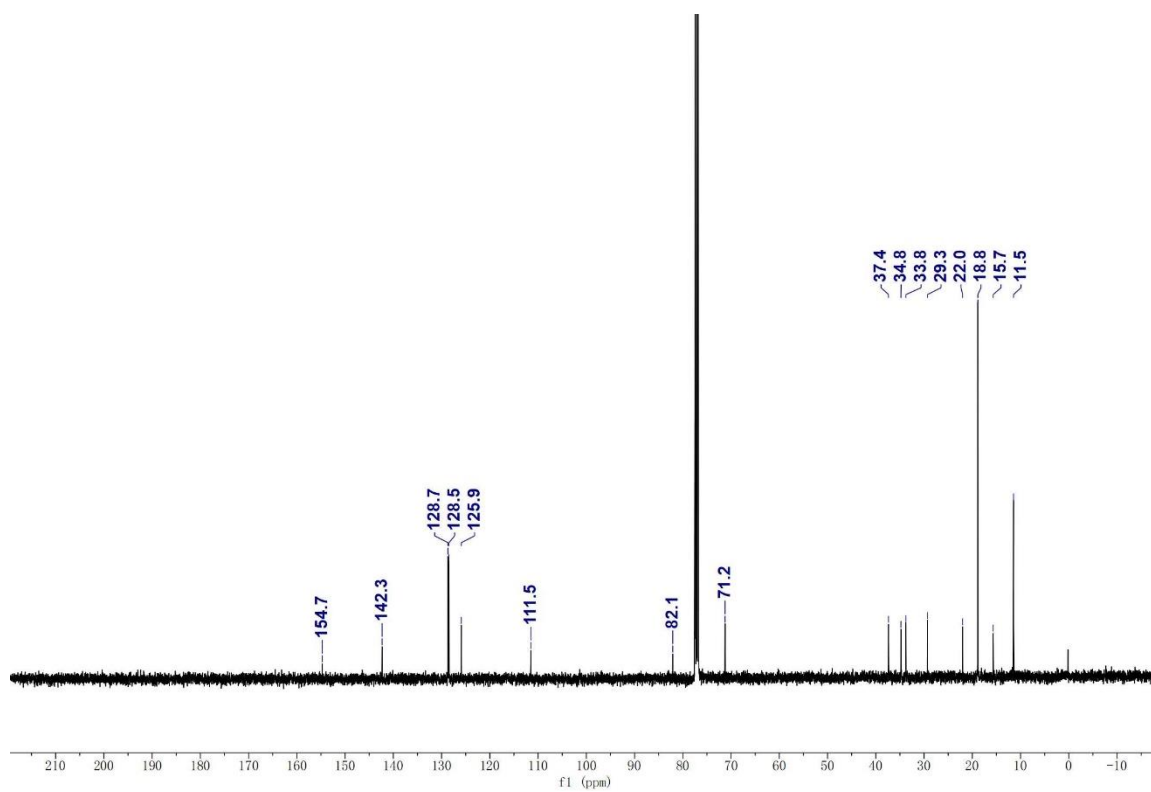

$^{13}\text{C}$  NMR spectrum of **3f** was measured in  $\text{CDCl}_3$  at 101 MHz

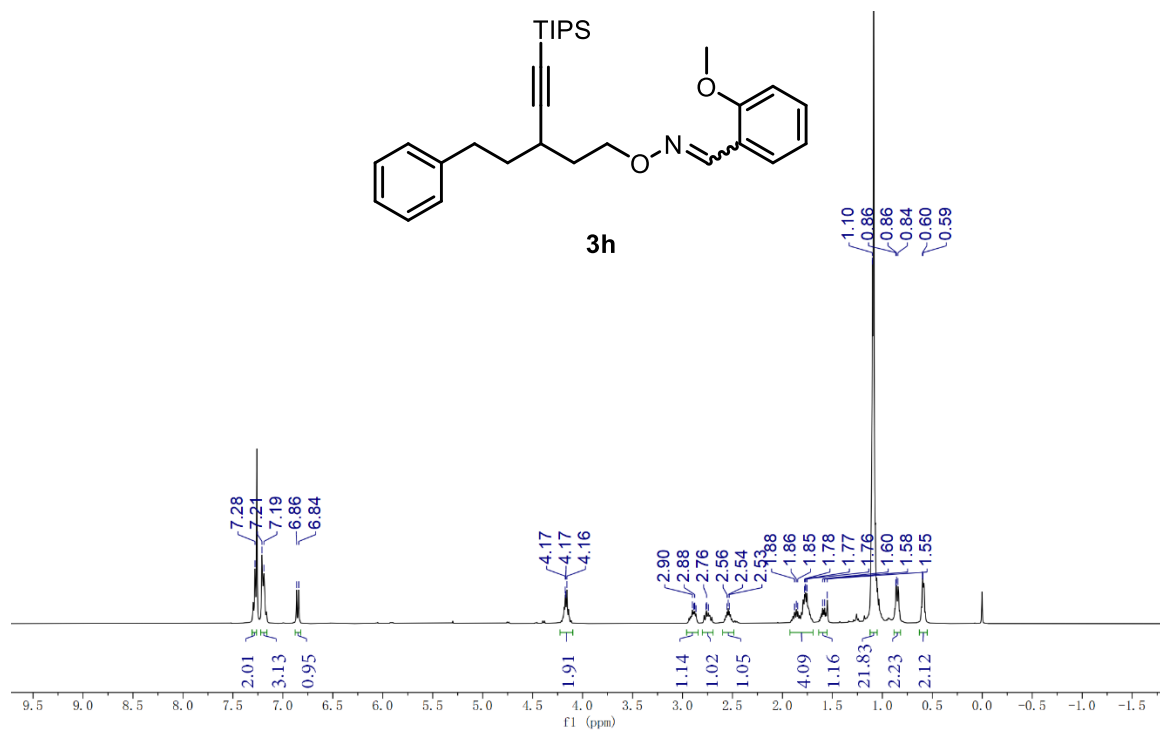

<sup>1</sup>H NMR spectrum of **3h** was measured in CDCl<sub>3</sub> at 400 MHz

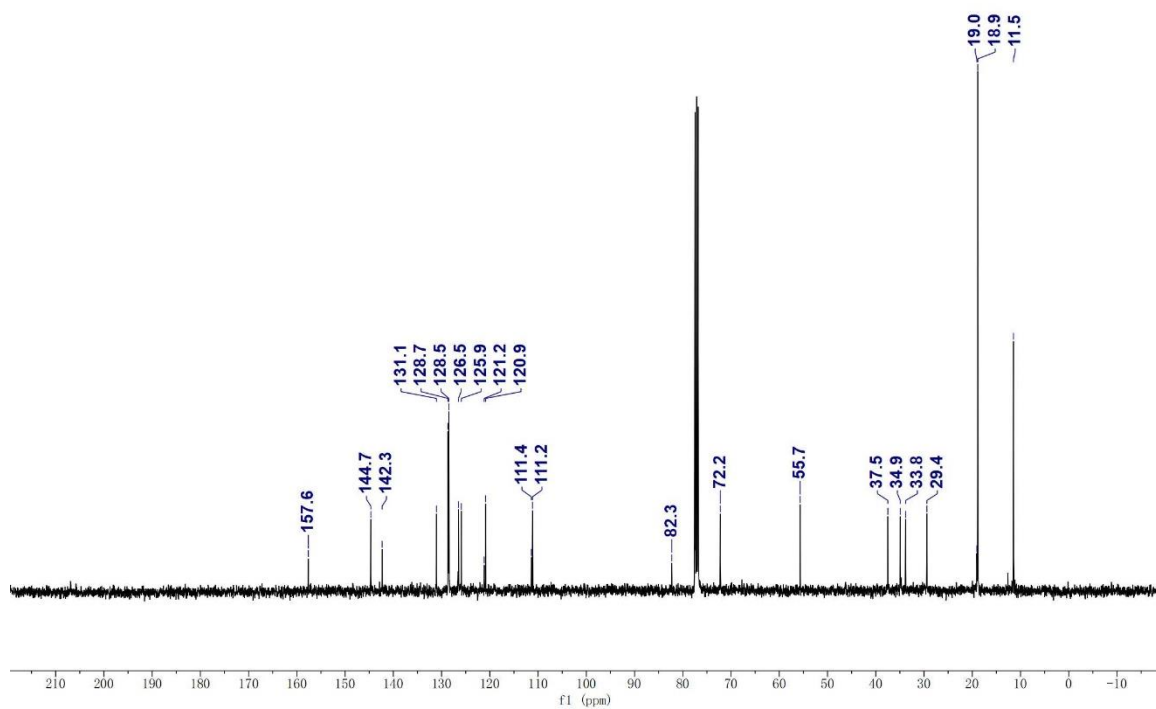

<sup>13</sup>C NMR spectrum of **3h** was measured in CDCl<sub>3</sub> at 101 MHz

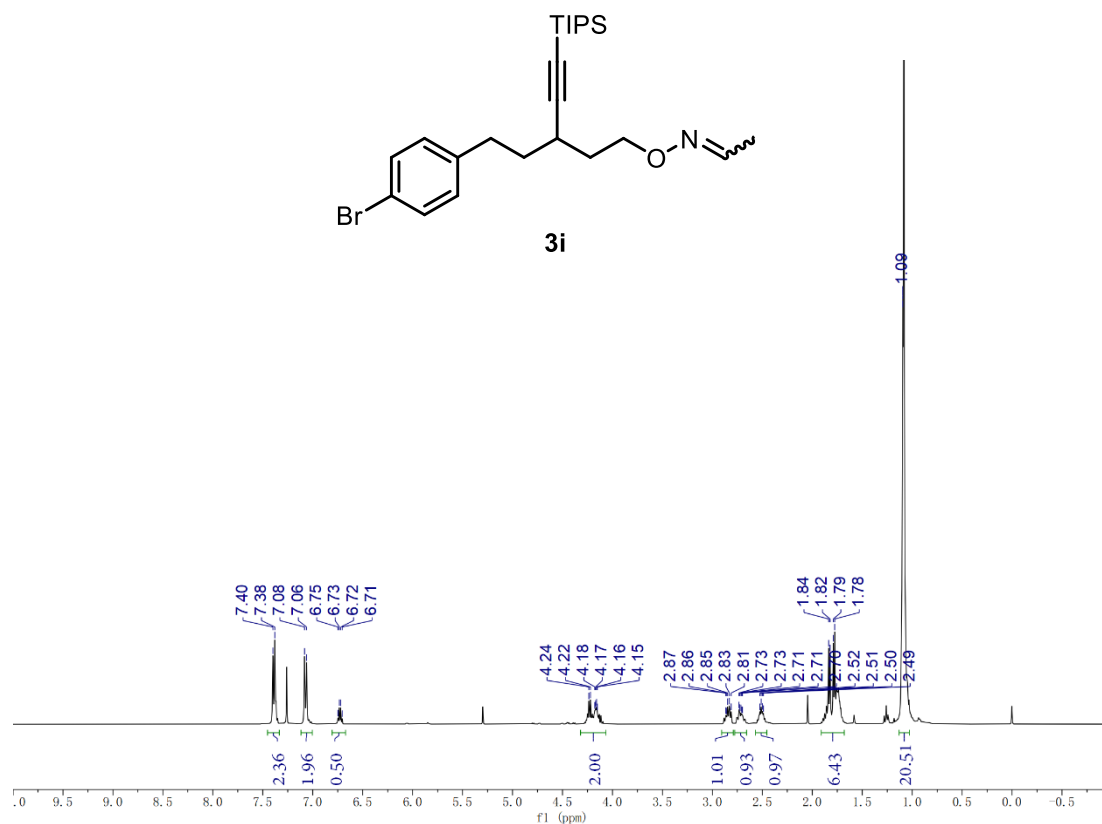

<sup>1</sup>H NMR spectrum of **3i** was measured in CDCl<sub>3</sub> at 400 MHz

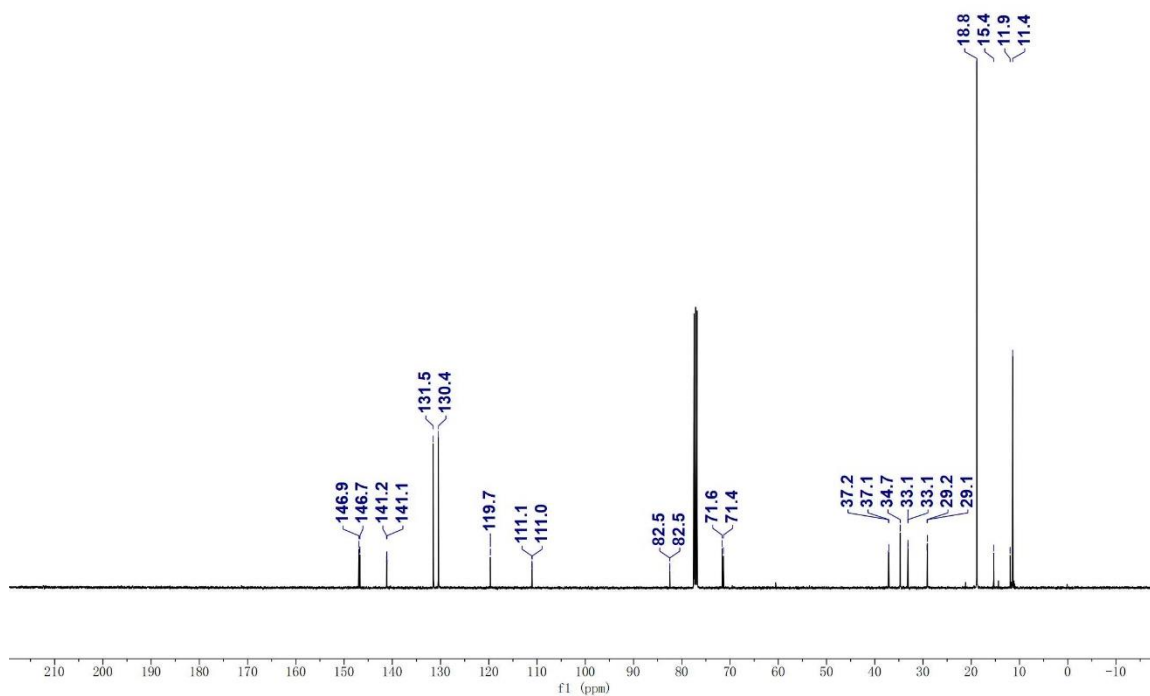

<sup>13</sup>C NMR spectrum of **3i** was measured in CDCl<sub>3</sub> at 101 MHz

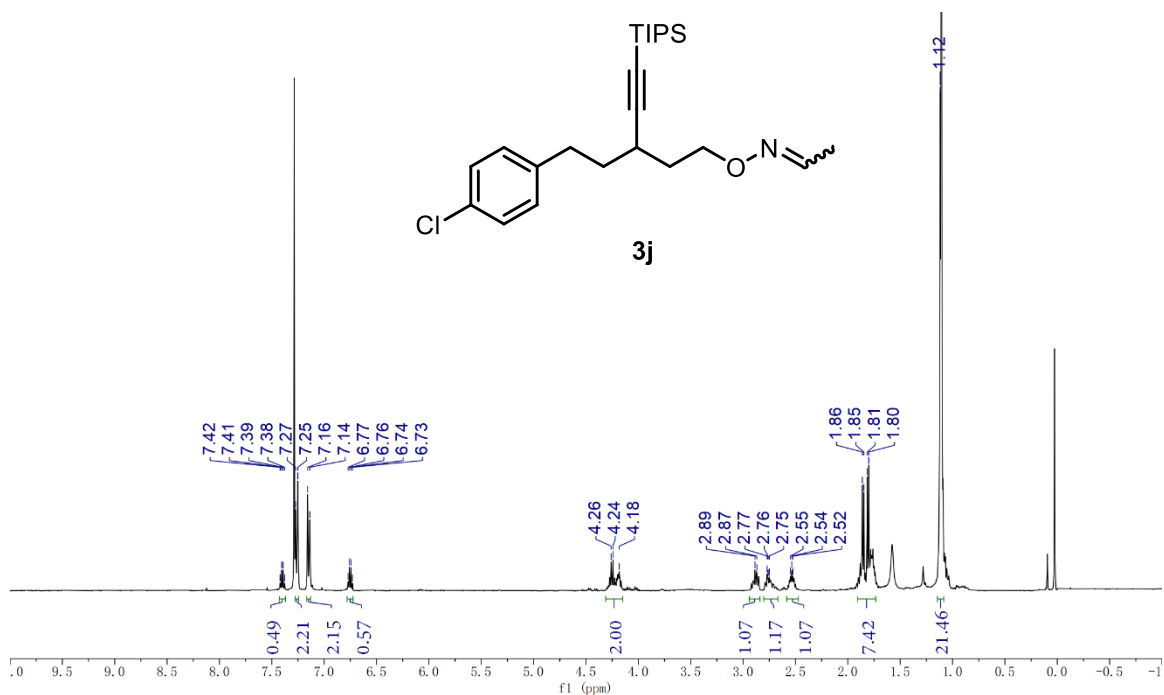

<sup>1</sup>H NMR spectrum of **3j** was measured in CDCl<sub>3</sub> at 400 MHz

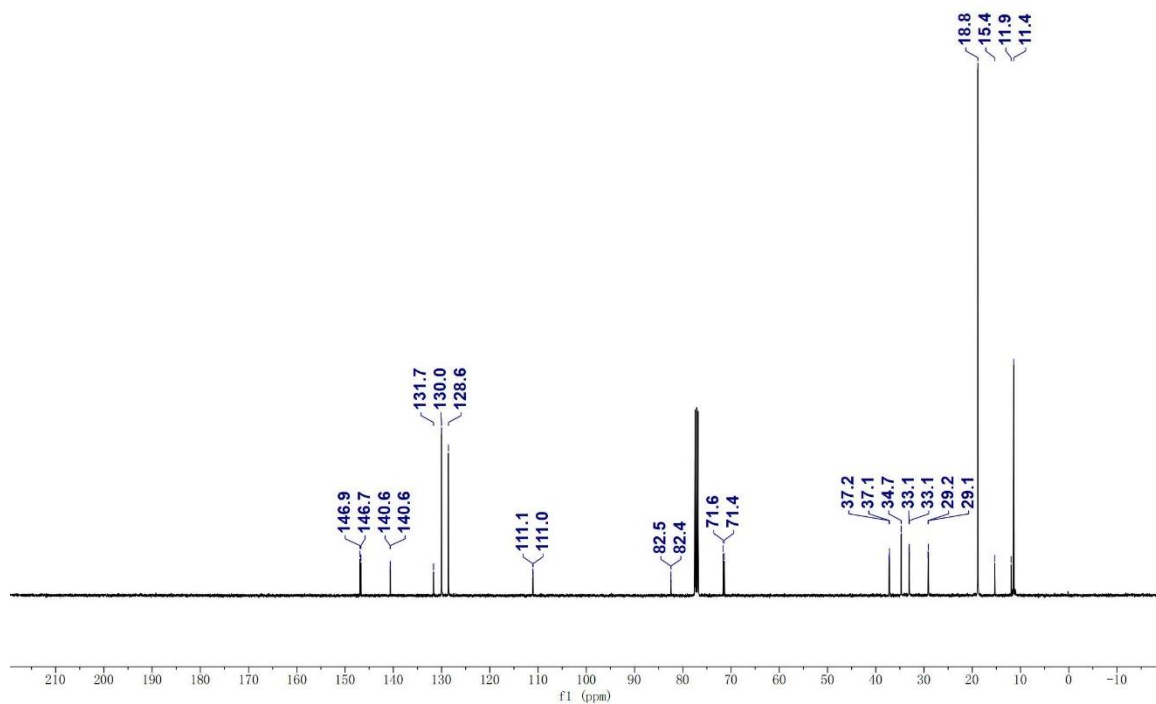

<sup>13</sup>C NMR spectrum of **3j** was measured in CDCl<sub>3</sub> at 101 MHz



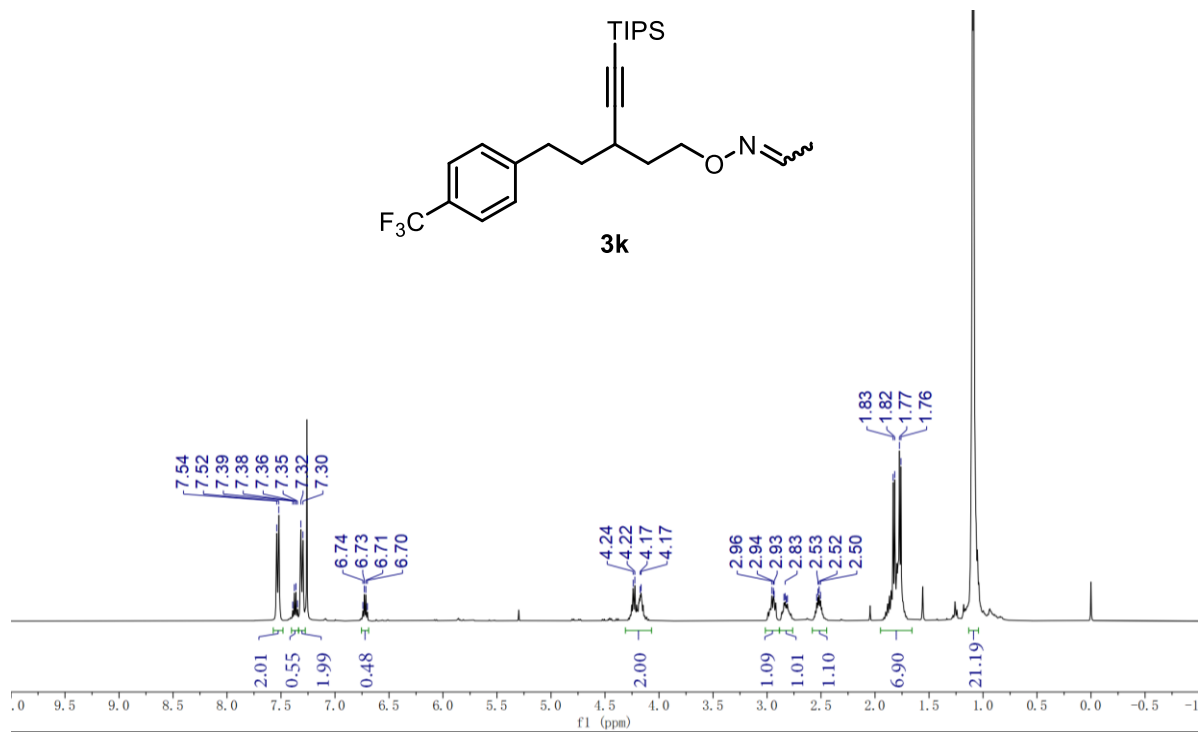

<sup>1</sup>H NMR spectrum of **3k** was measured in CDCl<sub>3</sub> at 400 MHz

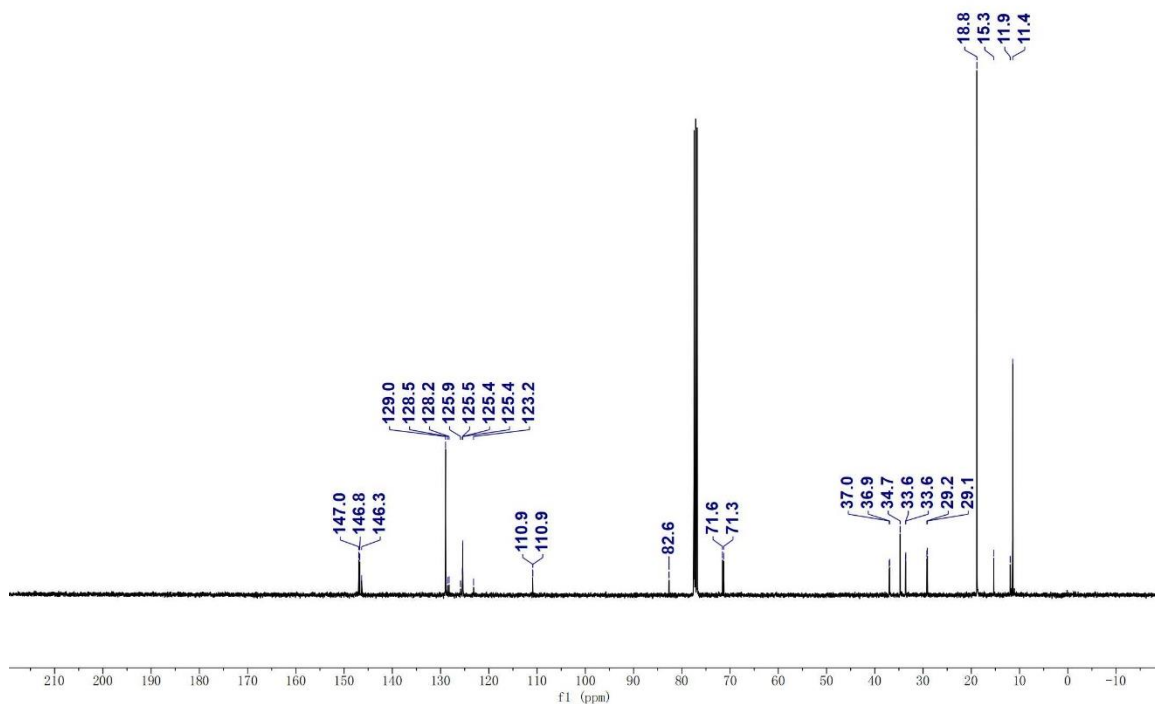

<sup>13</sup>C NMR spectrum of **3k** was measured in CDCl<sub>3</sub> at 101 MHz

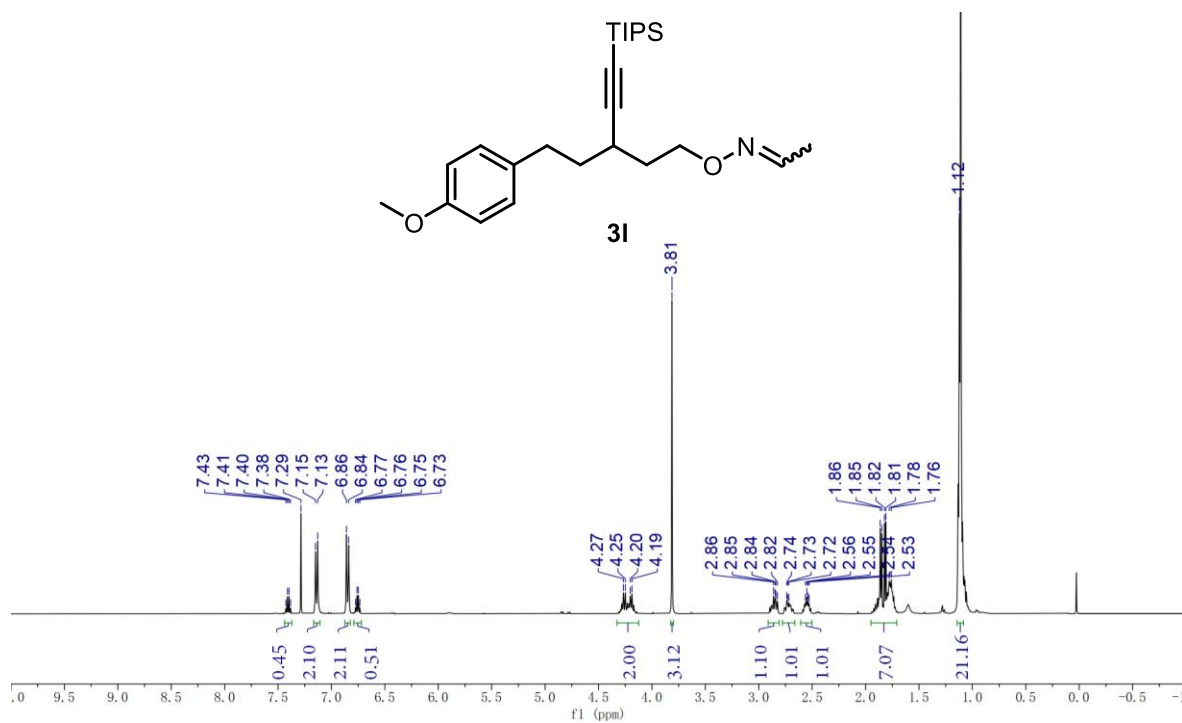

<sup>1</sup>H NMR spectrum of **3I** was measured in CDCl<sub>3</sub> at 400 MHz

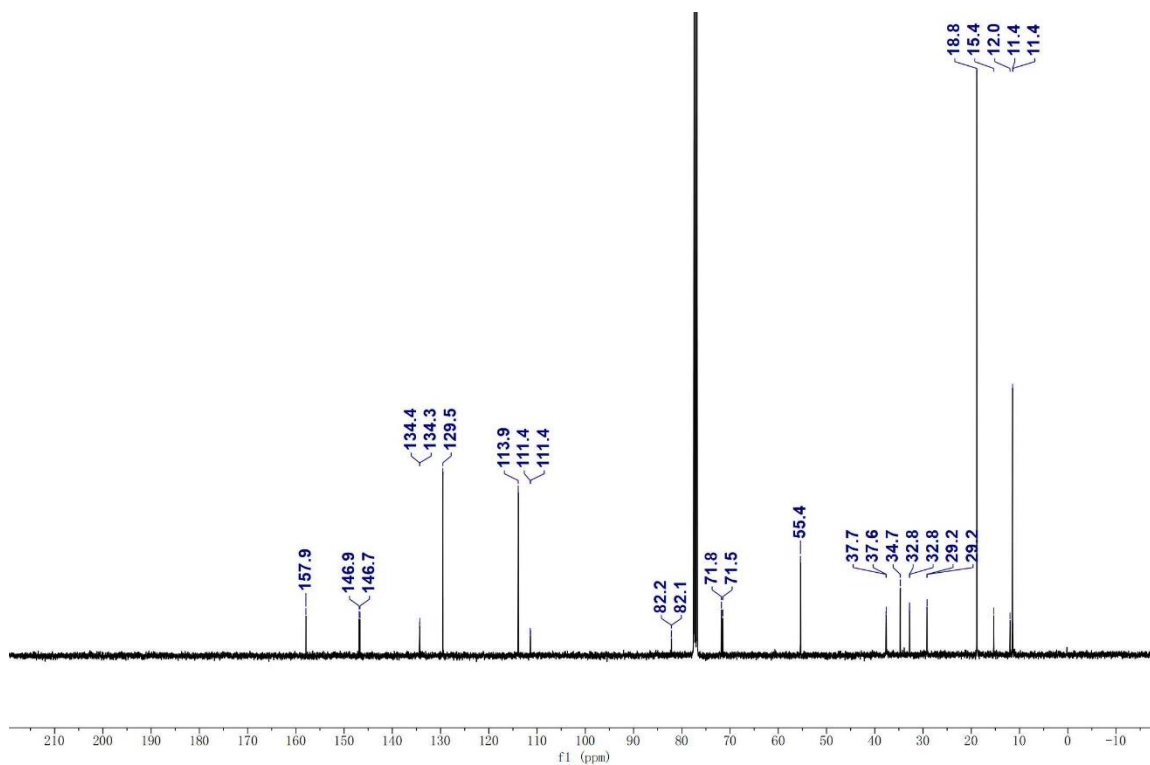

<sup>13</sup>C NMR spectrum of **3I** was measured in CDCl<sub>3</sub> at 101 MHz

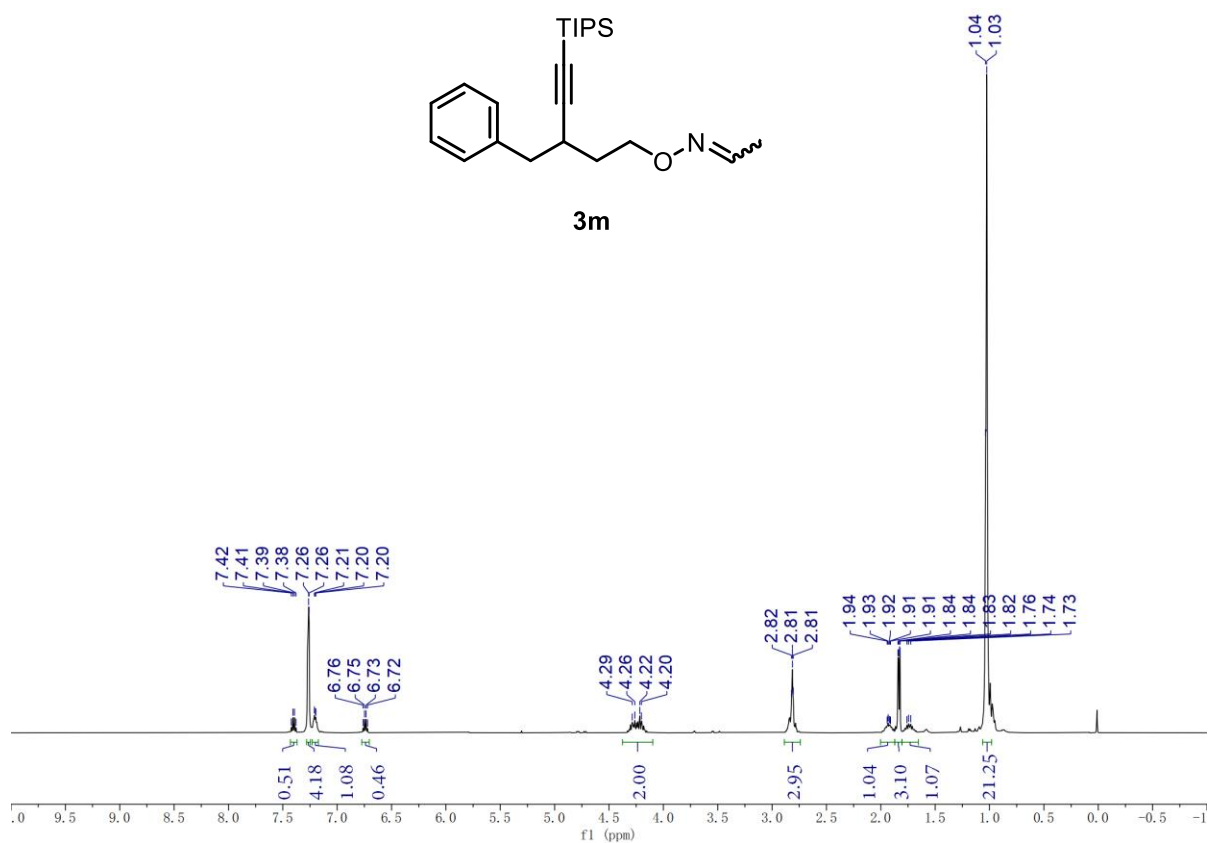

<sup>1</sup>H NMR spectrum of **3m** was measured in CDCl<sub>3</sub> at 400 MH

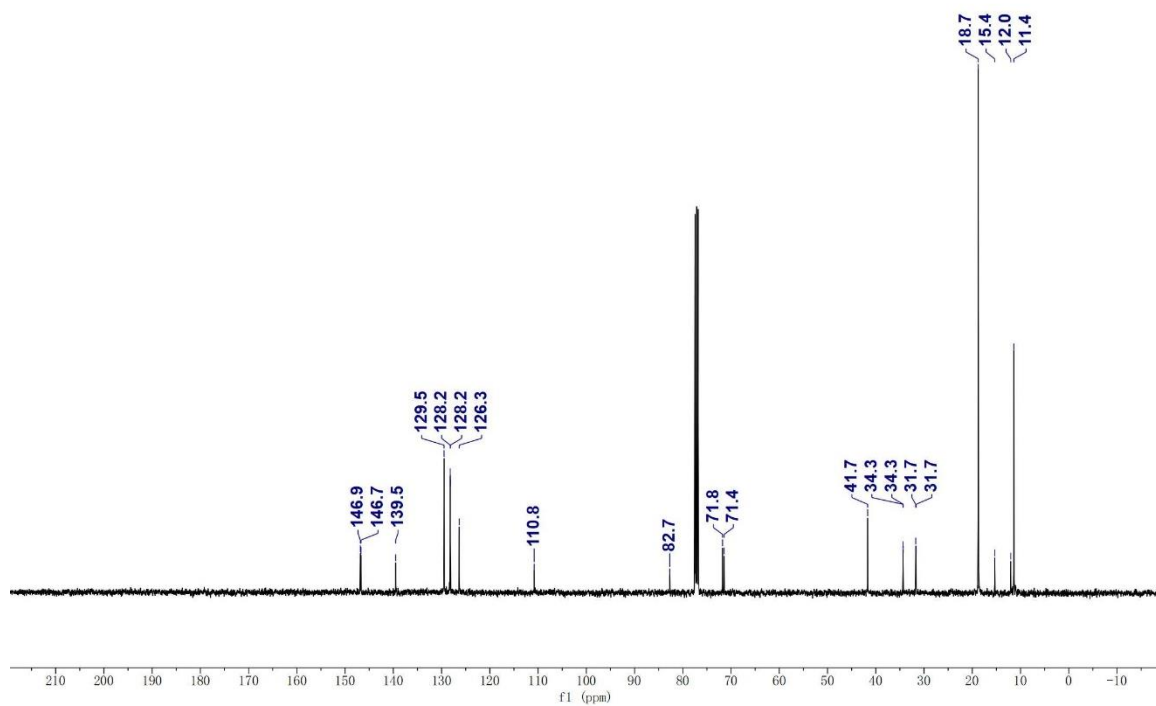

<sup>13</sup>C NMR spectrum of **3m** was measured in CDCl<sub>3</sub> at 101 MHz

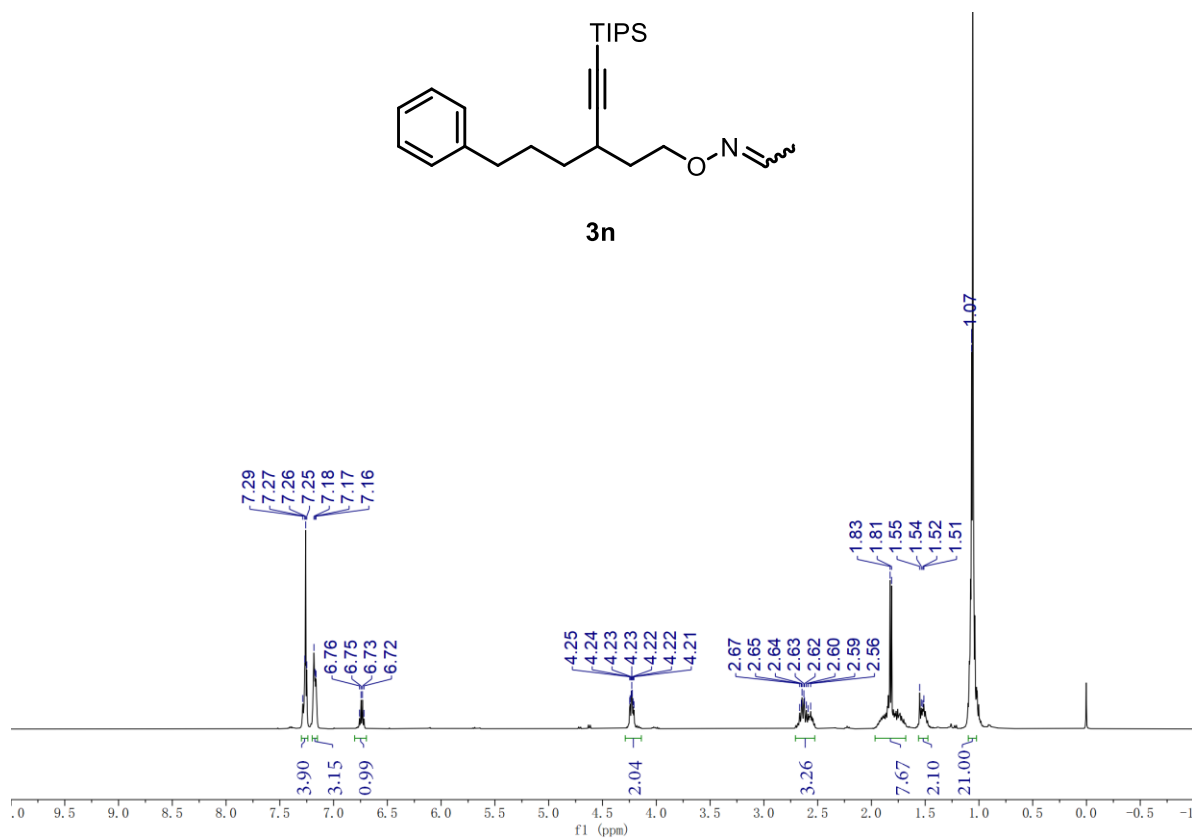

$^1\text{H}$  NMR spectrum of **3n** was measured in  $\text{CDCl}_3$  at 400 MHz

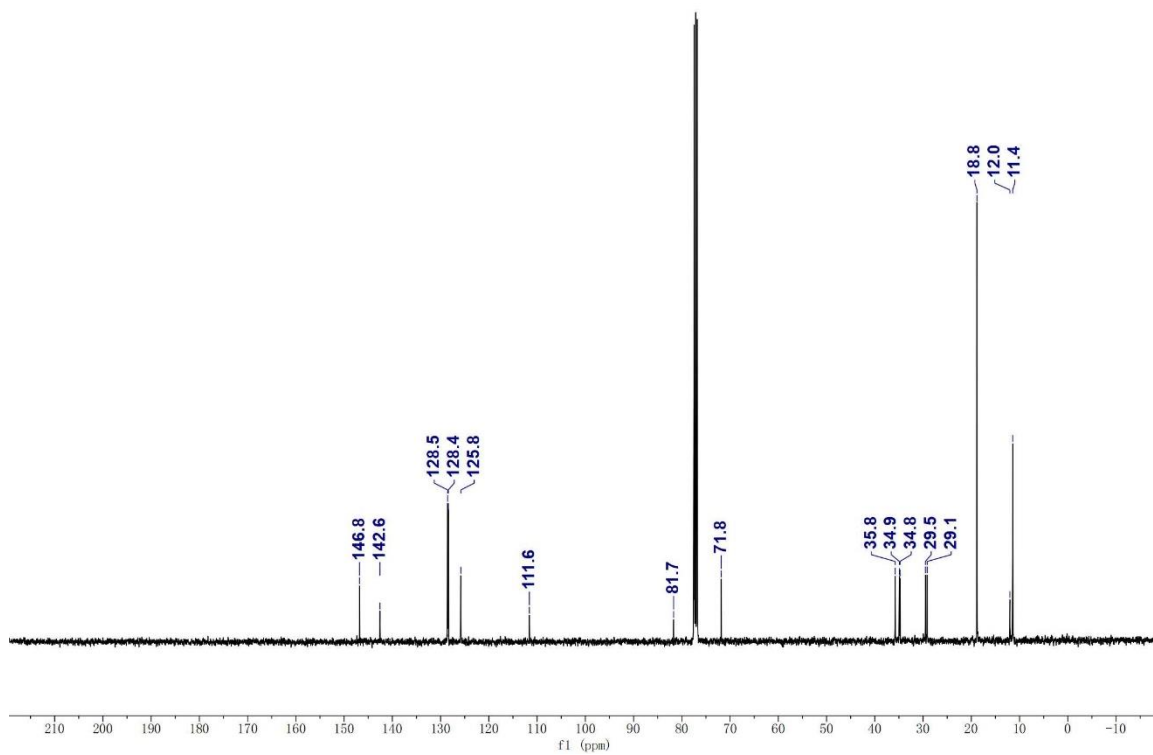

$^{13}\text{C}$  NMR spectrum of **3n** was measured in  $\text{CDCl}_3$  at 101 MHz

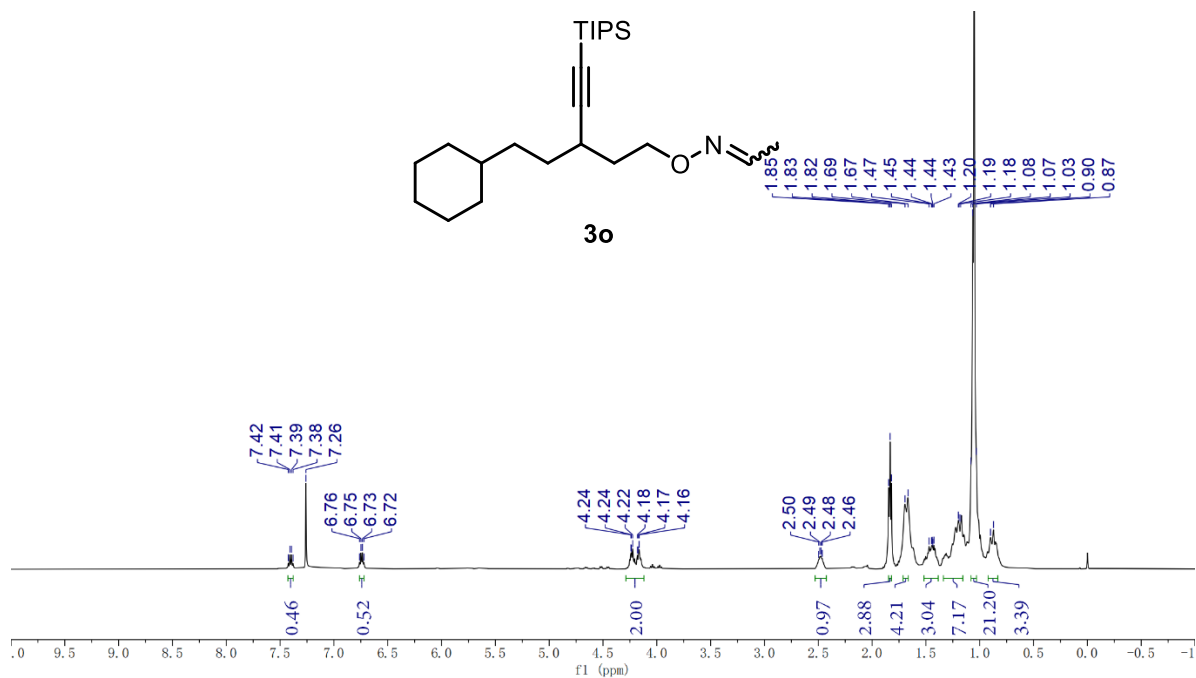

<sup>1</sup>H NMR spectrum of **3o** was measured in CDCl<sub>3</sub> at 400 MHz

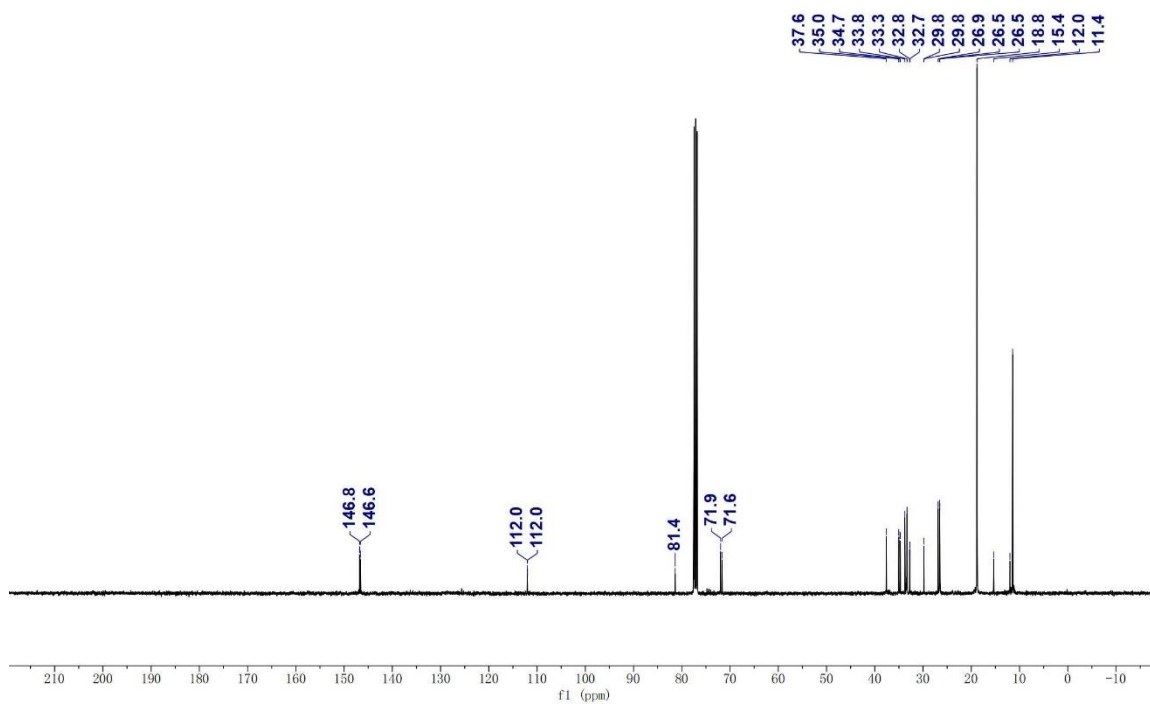

<sup>13</sup>C NMR spectrum of **3o** was measured in CDCl<sub>3</sub> at 101 MHz

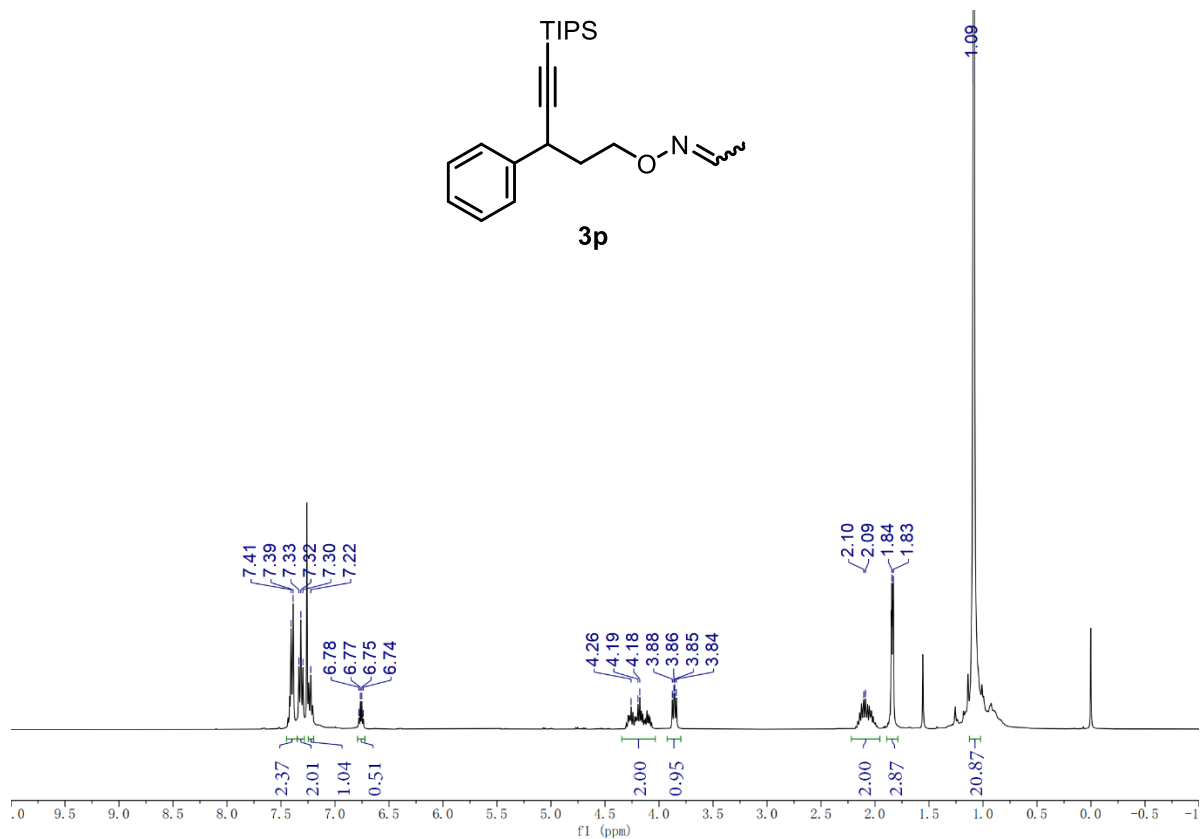

<sup>1</sup>H NMR spectrum of **3p** was measured in CDCl<sub>3</sub> at 400 MHz

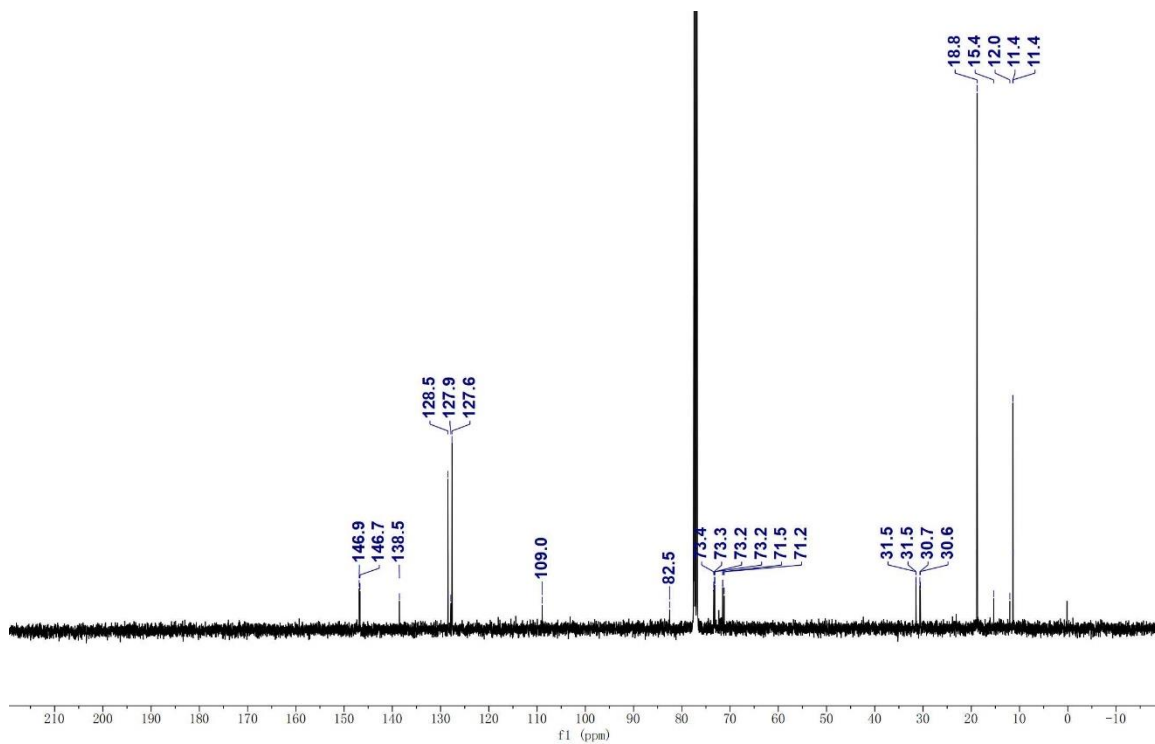

<sup>13</sup>C NMR spectrum of **3p** was measured in CDCl<sub>3</sub> at 101 MHz

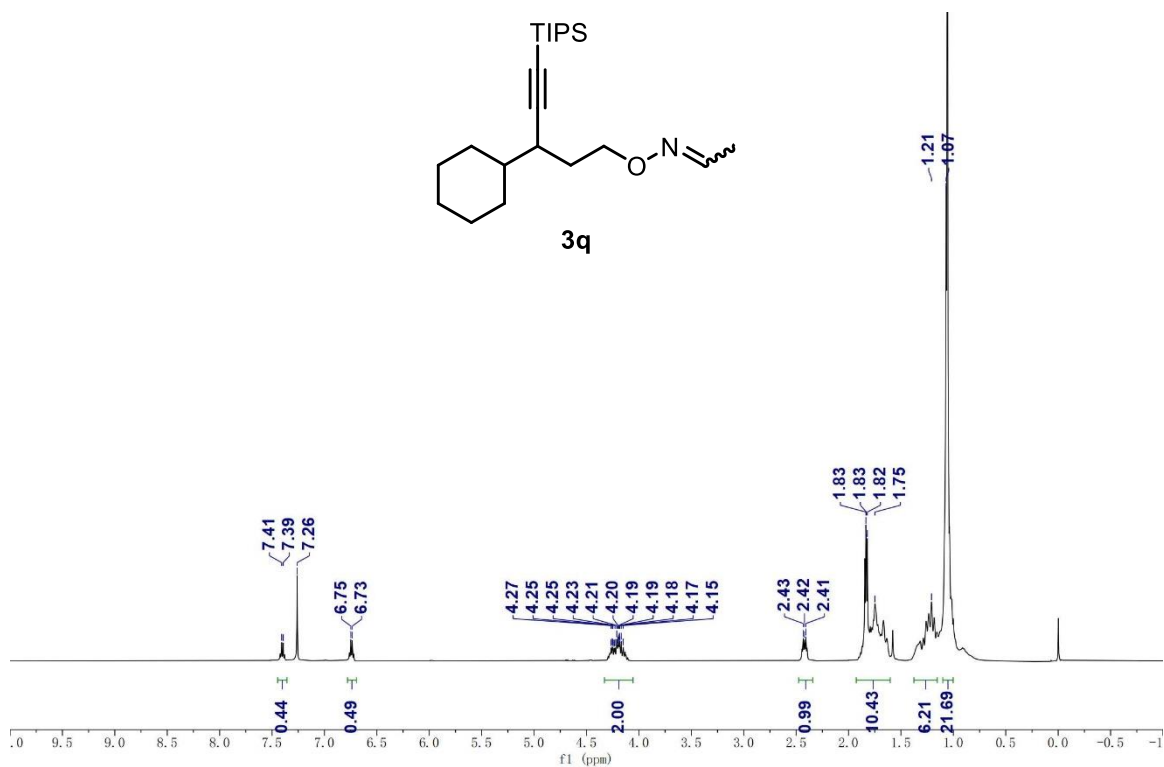

<sup>1</sup>H NMR spectrum of **3q** was measured in CDCl<sub>3</sub> at 400 MHz

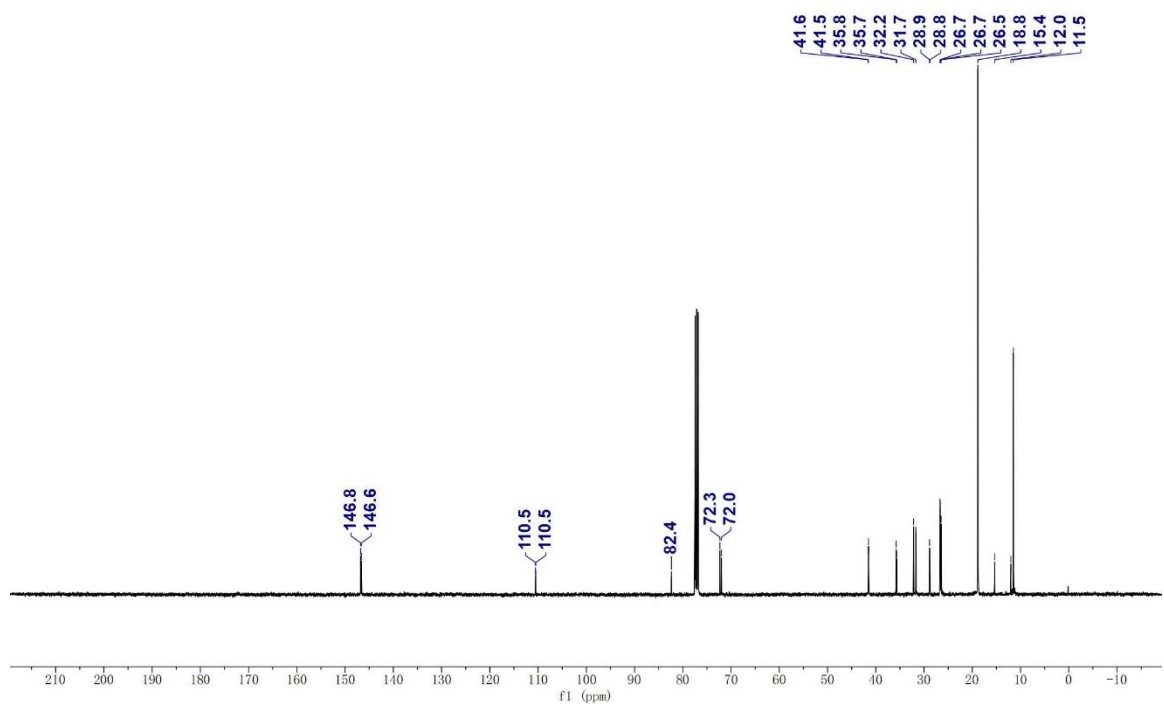

<sup>13</sup>C NMR spectrum of **3q** was measured in CDCl<sub>3</sub> at 101 MHz

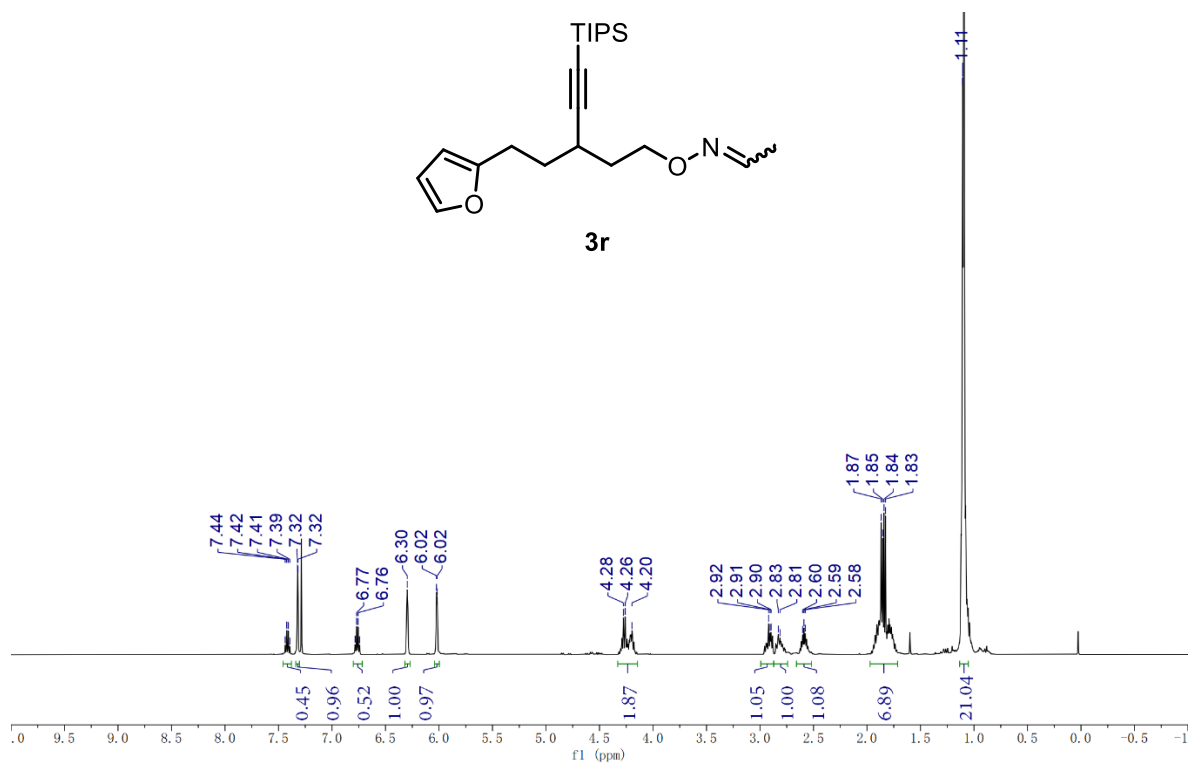

$^1\text{H}$  NMR spectrum of **3r** was measured in  $\text{CDCl}_3$  at 400 MHz

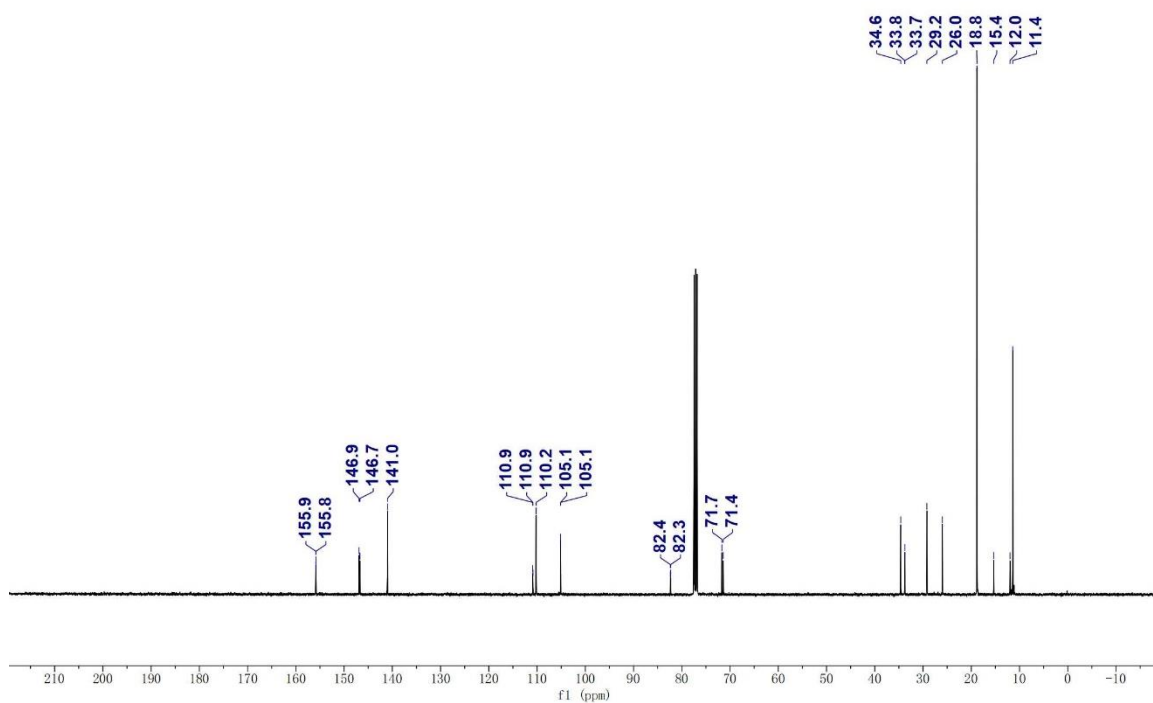

$^{13}\text{C}$  NMR spectrum of **3r** was measured in  $\text{CDCl}_3$  at 101 MHz



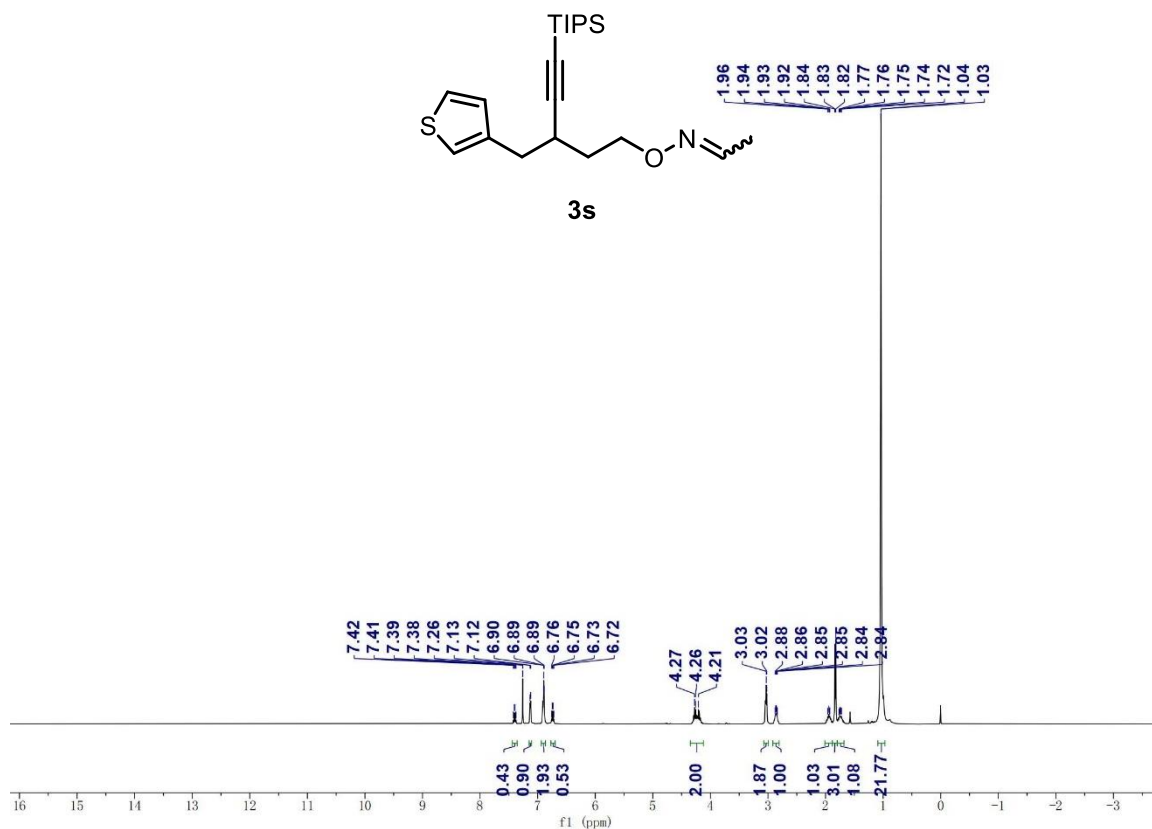

<sup>1</sup>H NMR spectrum of **3s** was measured in CDCl<sub>3</sub> at 400 MHz

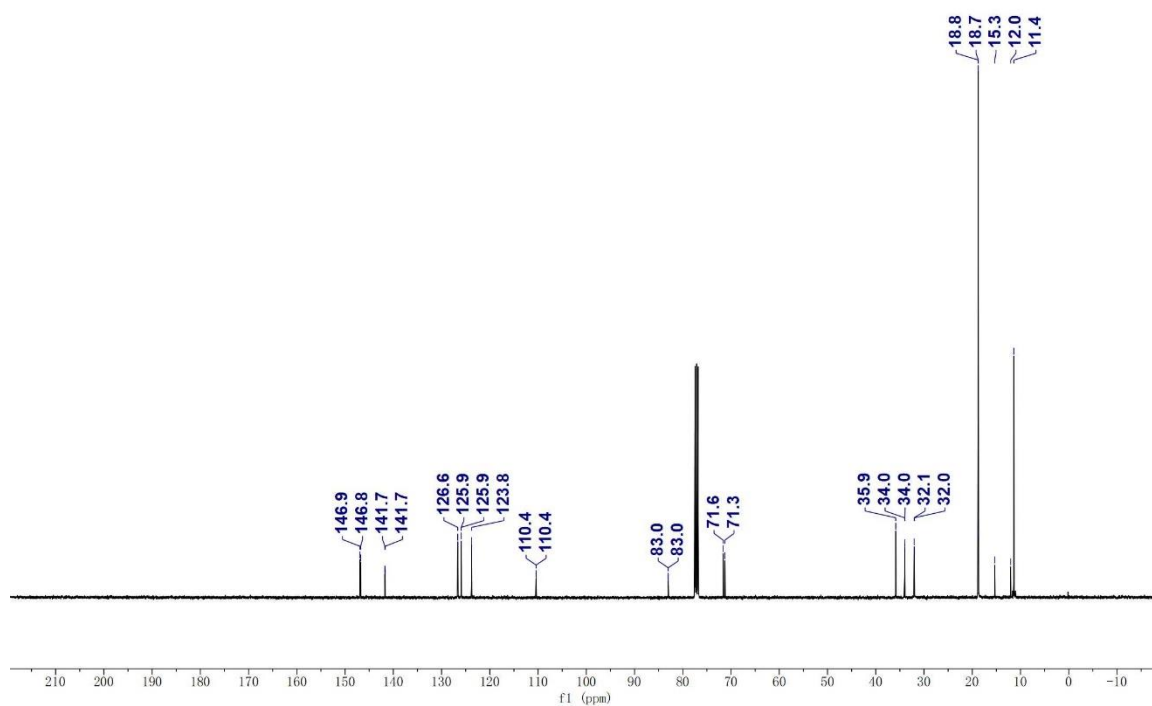

<sup>13</sup>C NMR spectrum of **3s** was measured in CDCl<sub>3</sub> at 101 MHz

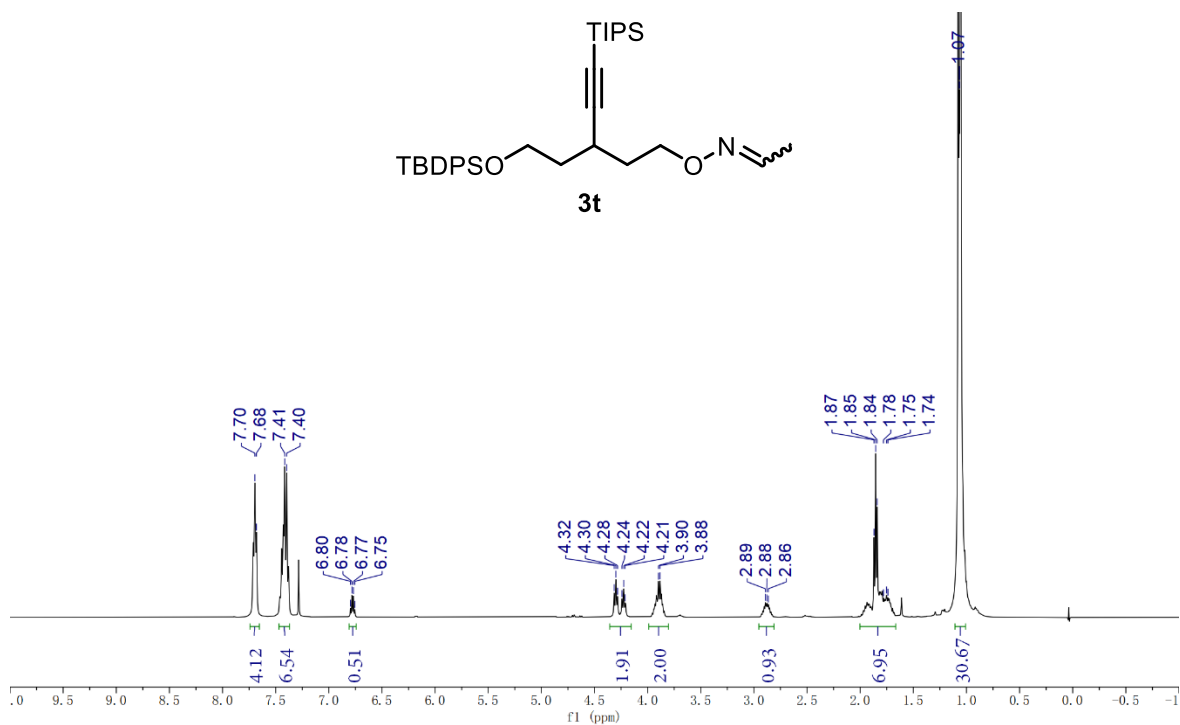

<sup>13</sup>C NMR spectrum (CDCl<sub>3</sub>) of compound 10a. The x-axis is labeled 'f1 (ppm)' and ranges from -10 to 210. The spectrum shows several sharp peaks. Key peaks are labeled with their chemical shifts: 146.8, 146.6, 135.7, 135.6, 134.2, 134.1, 129.6, 127.7, 111.2, 81.7, 81.7, 71.7, 71.4, 62.0, 62.0, 38.3, 38.3, 34.8, 34.8, 27.0, 26.2, 19.4, 18.8, 15.4, 12.0, and 11.4. The peaks at 146.8 and 146.6 are in the carbonyl region. The cluster of peaks between 130 and 140 ppm corresponds to aromatic carbons. The peak at 111.2 is likely the solvent CDCl<sub>3</sub>. The peaks between 60 and 80 ppm are in the aliphatic region. The peaks at 38.3, 34.8, 27.0, 26.2, 19.4, 18.8, 15.4, 12.0, and 11.4 are in the aliphatic region.

S73

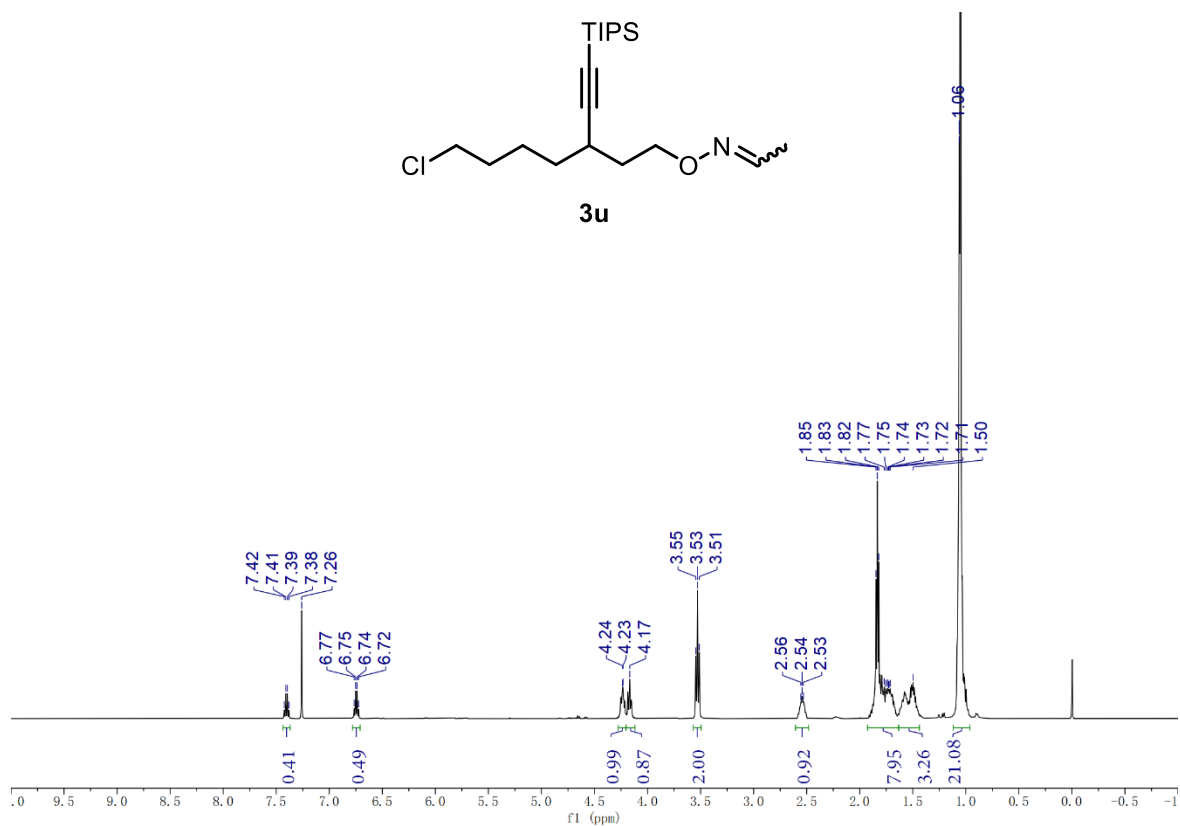

$^1\text{H}$  NMR spectrum of **3u** was measured in  $\text{CDCl}_3$  at 400 MHz

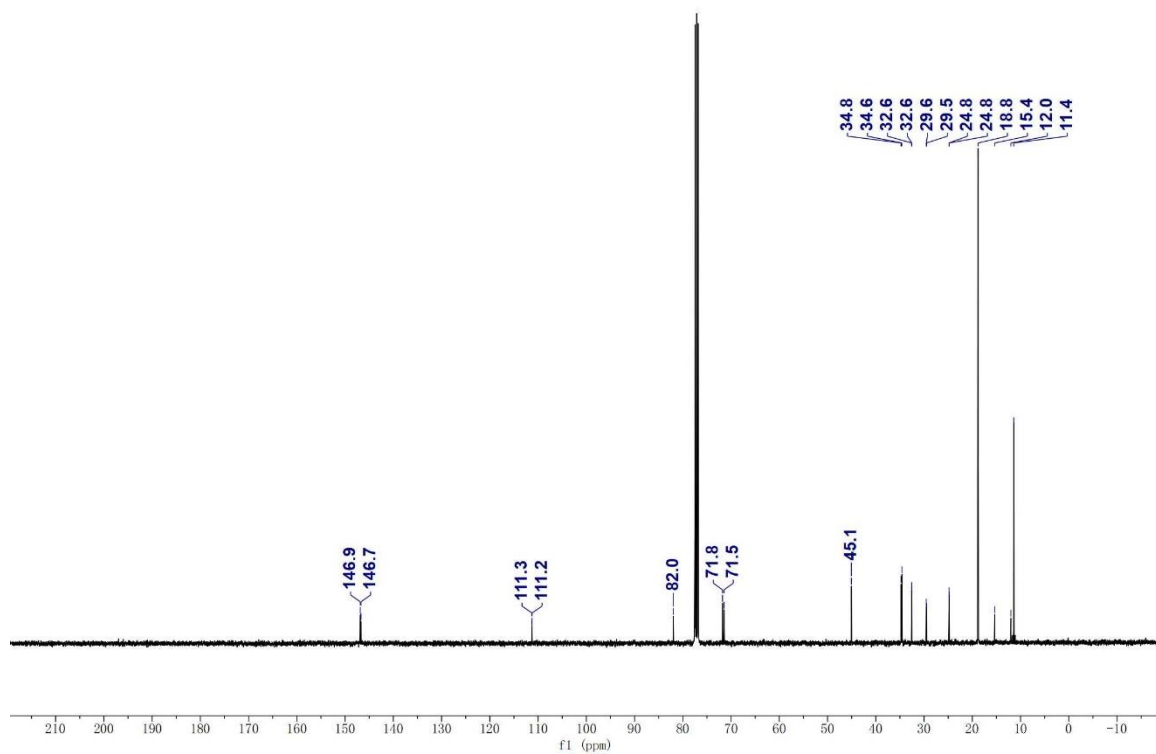

$^{13}\text{C}$  NMR spectrum of **3u** was measured in  $\text{CDCl}_3$  at 101 MHz

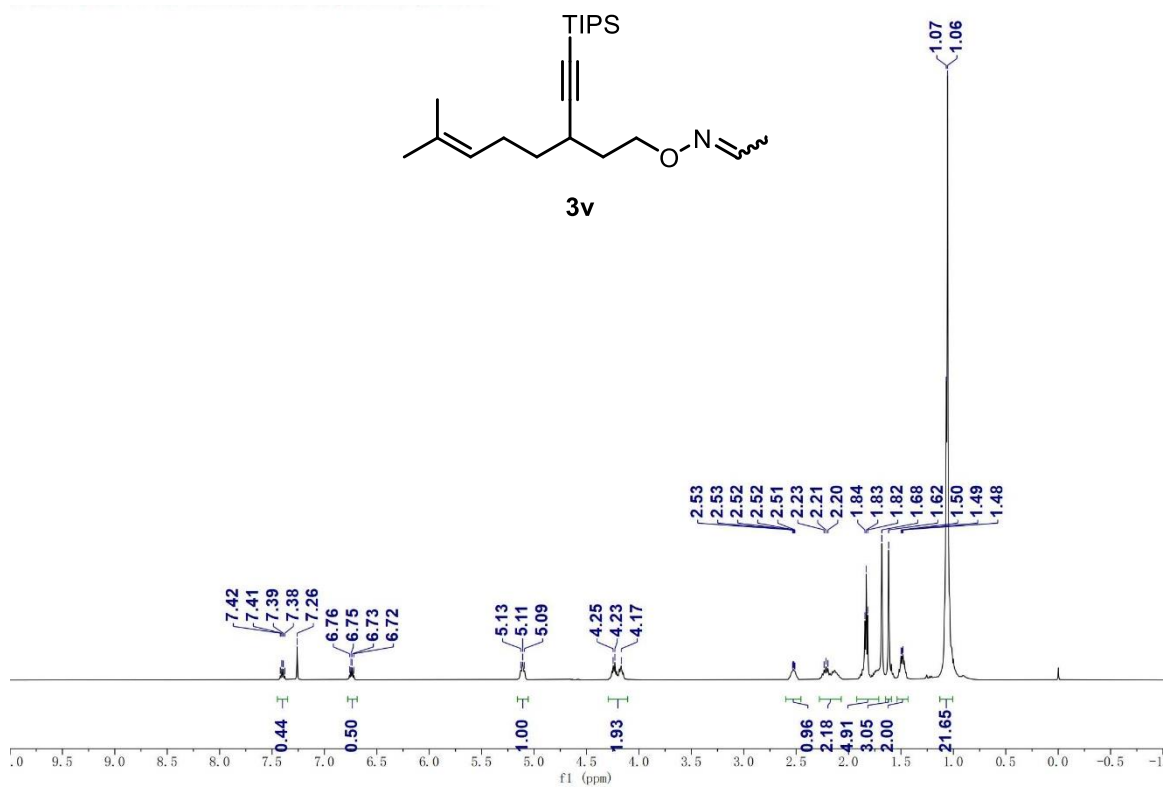

<sup>1</sup>H NMR spectrum of **3v** was measured in CDCl<sub>3</sub> at 400 MHz

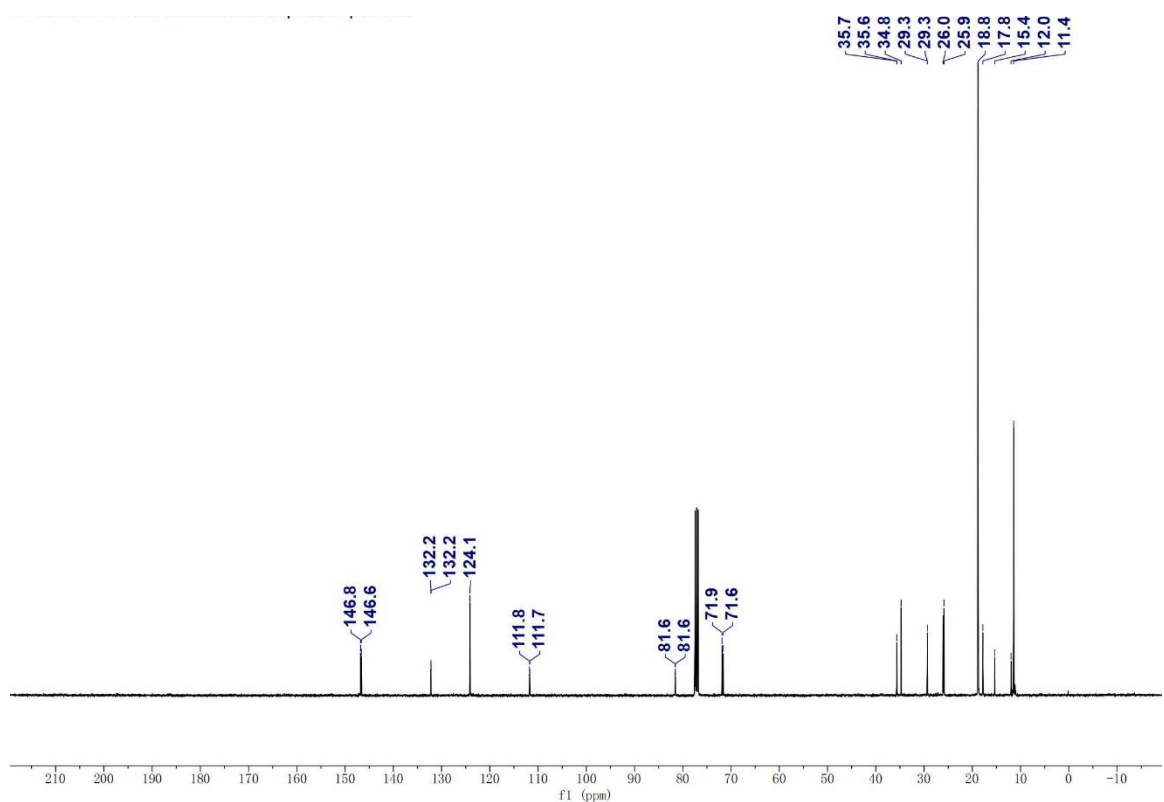

<sup>13</sup>C NMR spectrum of **3v** was measured in CDCl<sub>3</sub> at 101 MHz

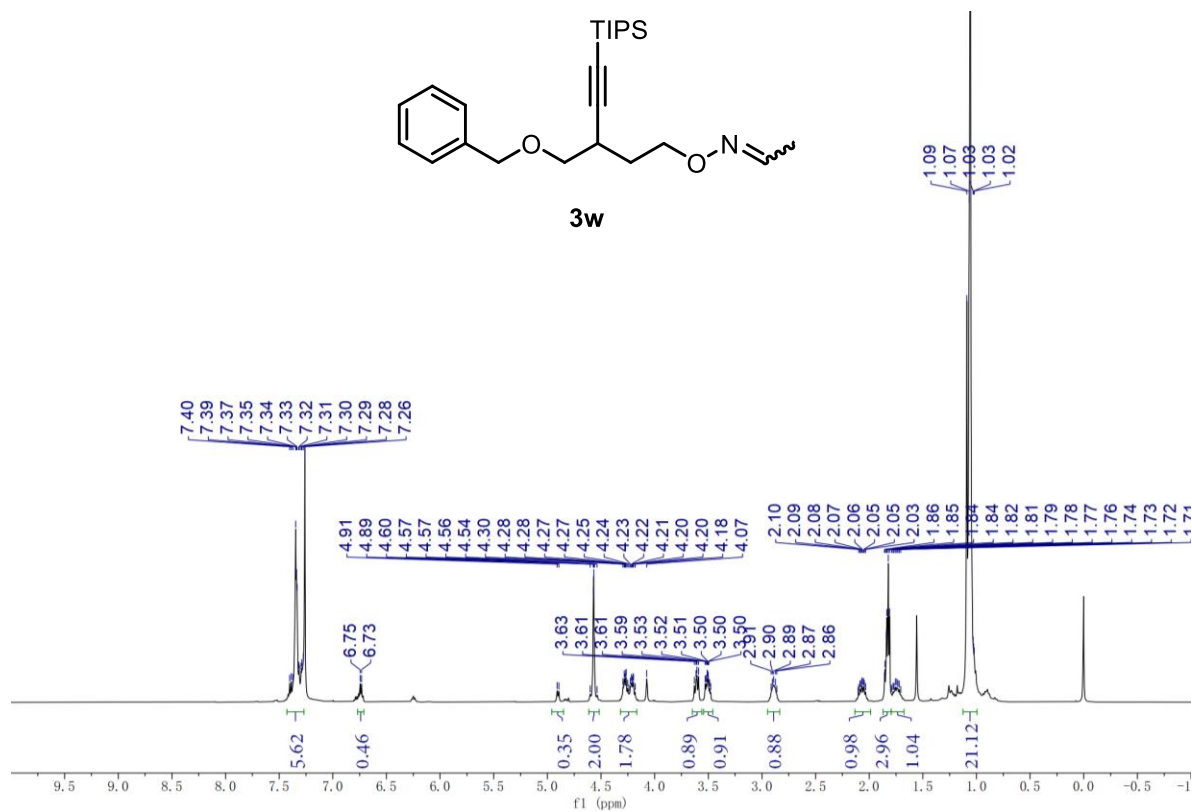

<sup>1</sup>H NMR spectrum of **3w** was measured in CDCl<sub>3</sub> at 400 MH

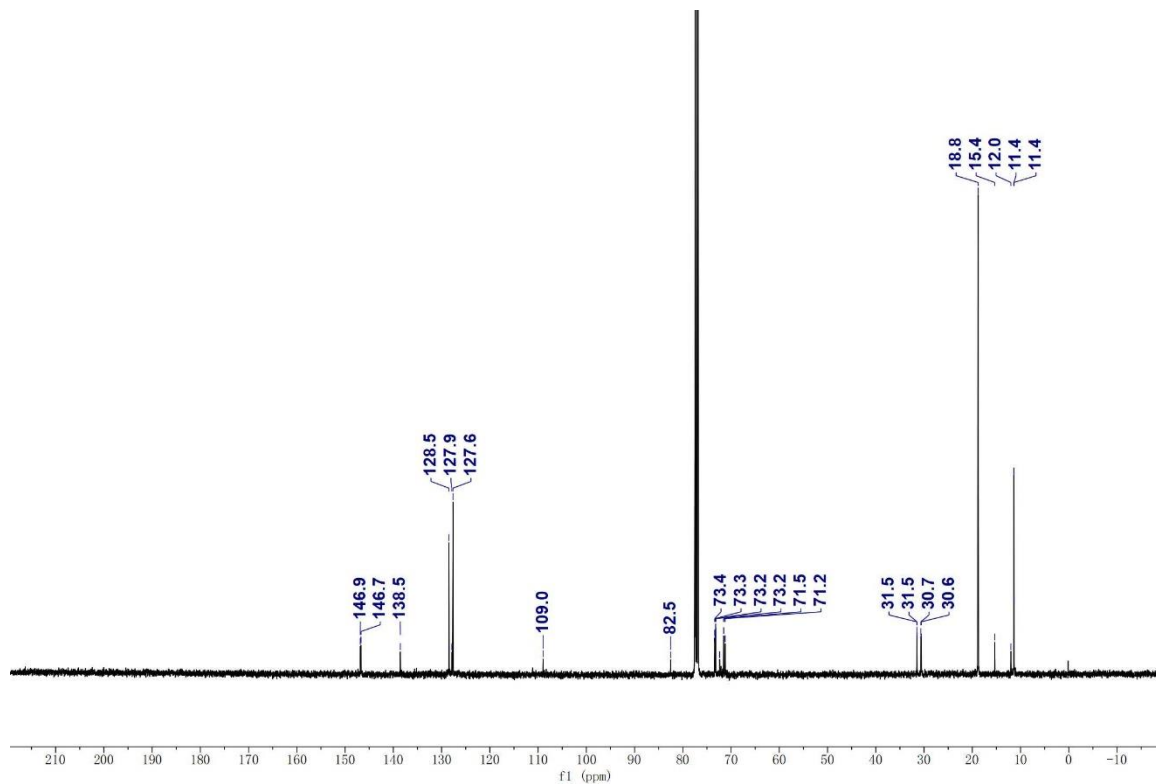

<sup>13</sup>C NMR spectrum of **3w** was measured in CDCl<sub>3</sub> at 101 MHz

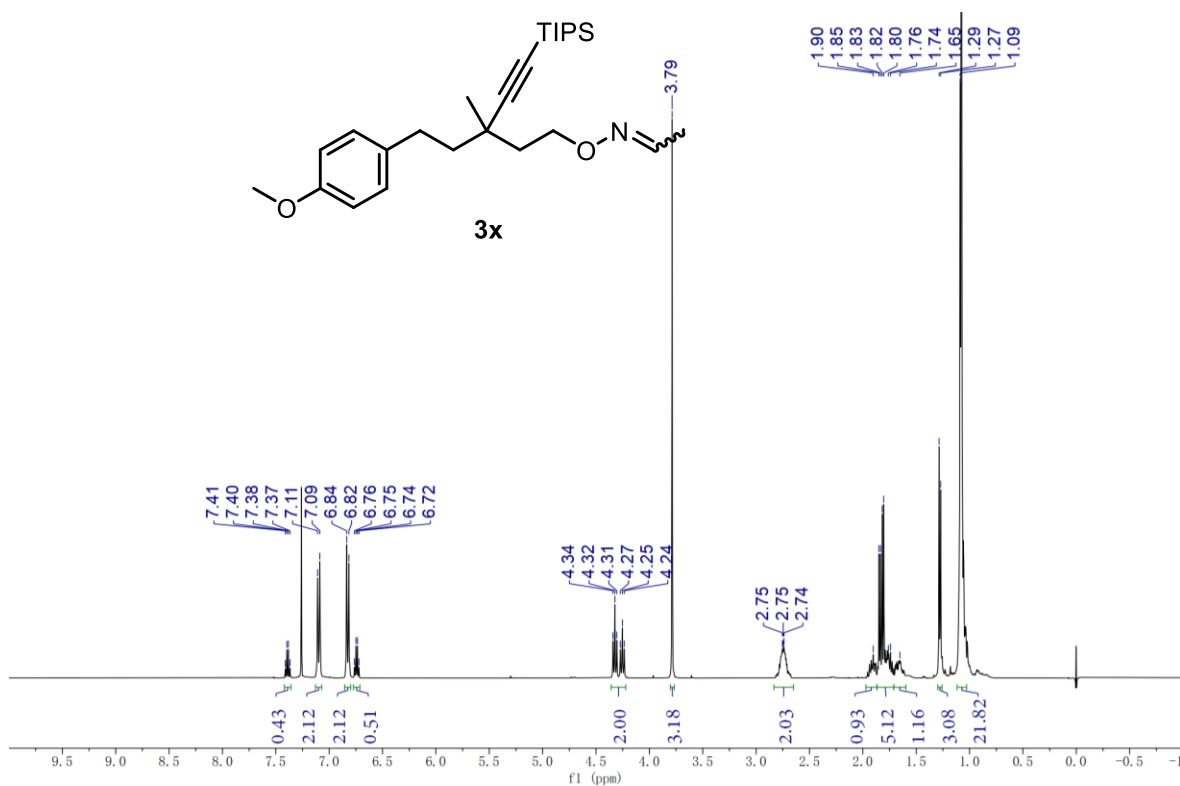

<sup>1</sup>H NMR spectrum of **3x** was measured in CDCl<sub>3</sub> at 400 MH

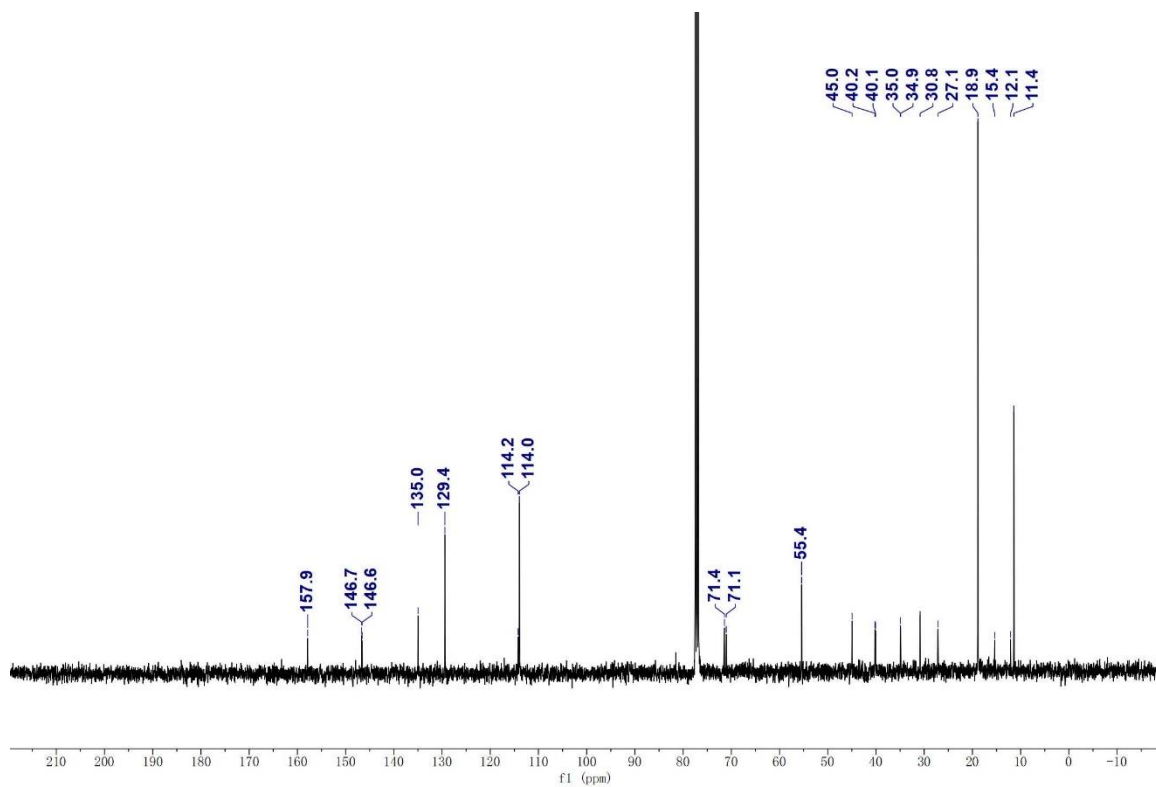

<sup>13</sup>C NMR spectrum of **3x** was measured in CDCl<sub>3</sub> at 101 MHz

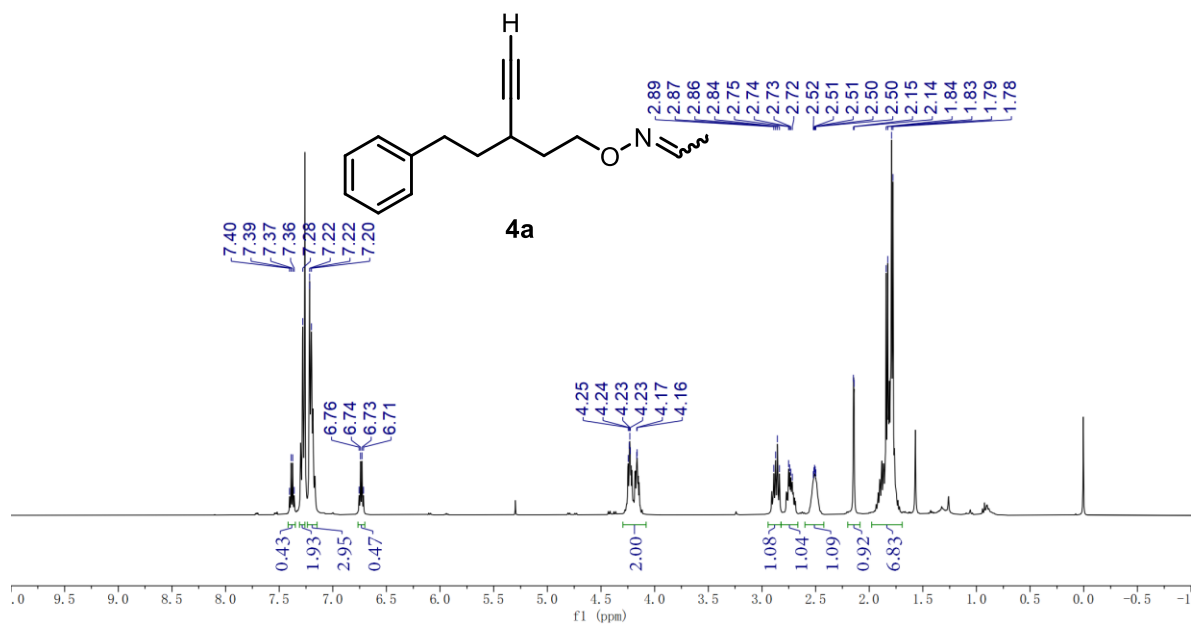

<sup>1</sup>H NMR spectrum of **4a** was measured in CDCl<sub>3</sub> at 400 MH

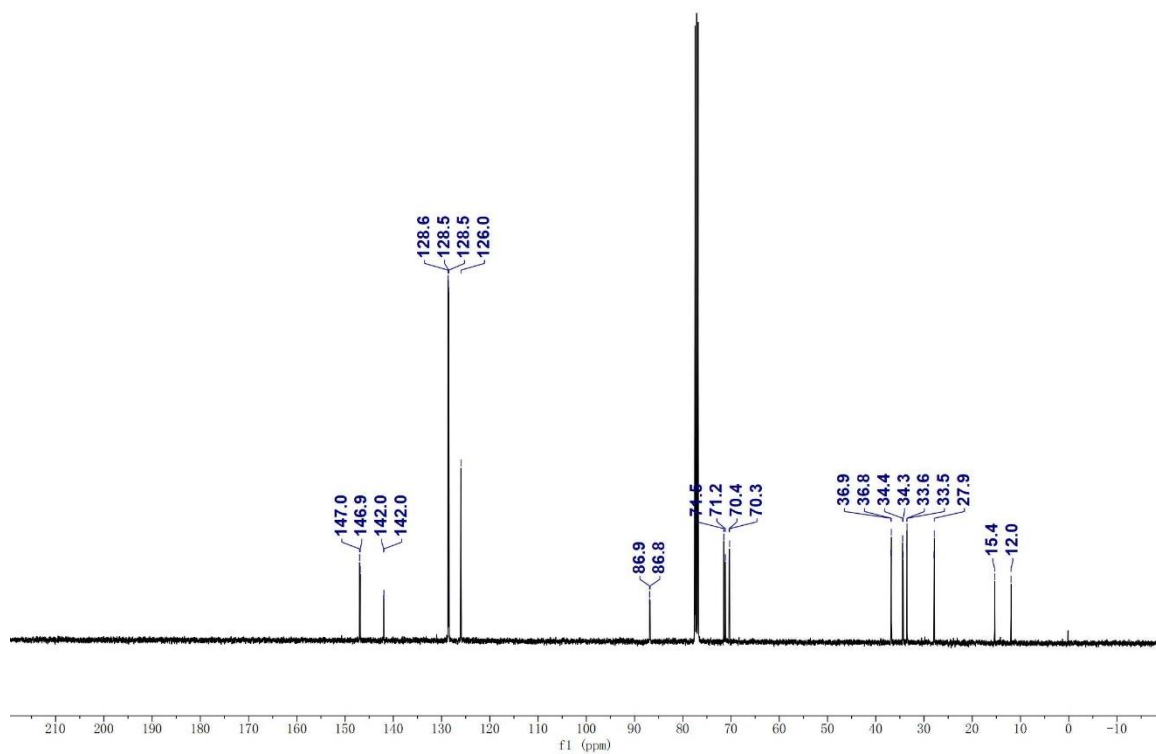

<sup>13</sup>C NMR spectrum of **4a** was measured in CDCl<sub>3</sub> at 101 MHz

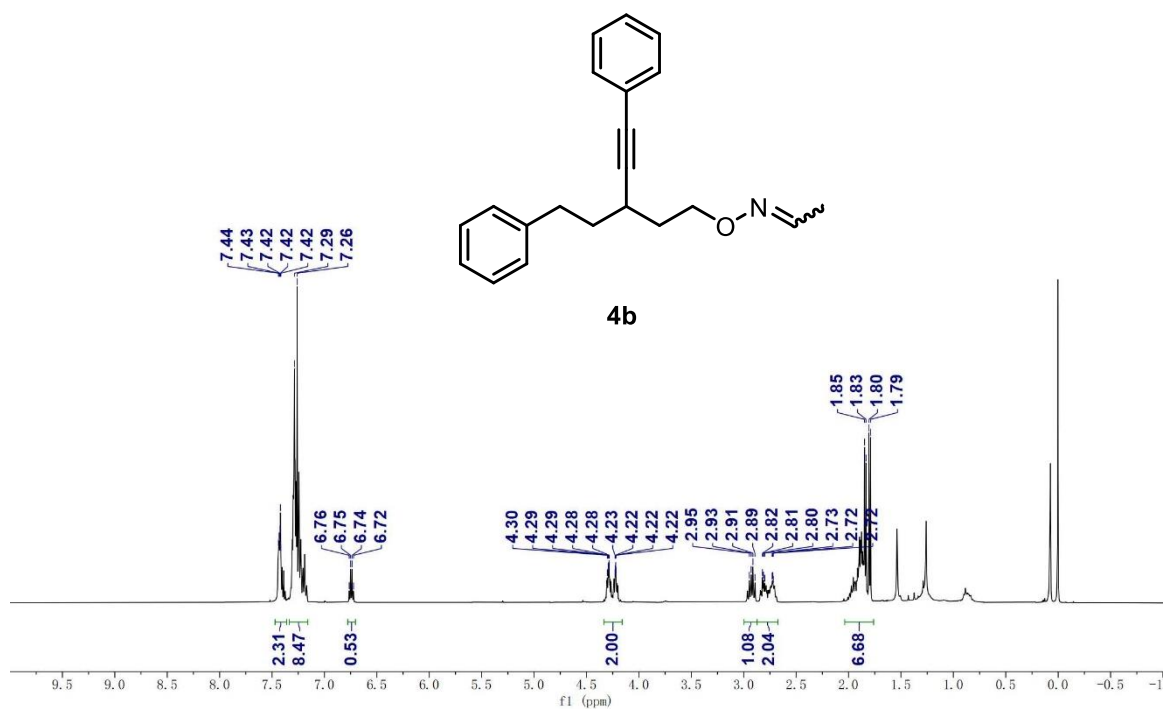

<sup>1</sup>H NMR spectrum of **4b** was measured in CDCl<sub>3</sub> at 400 MHz

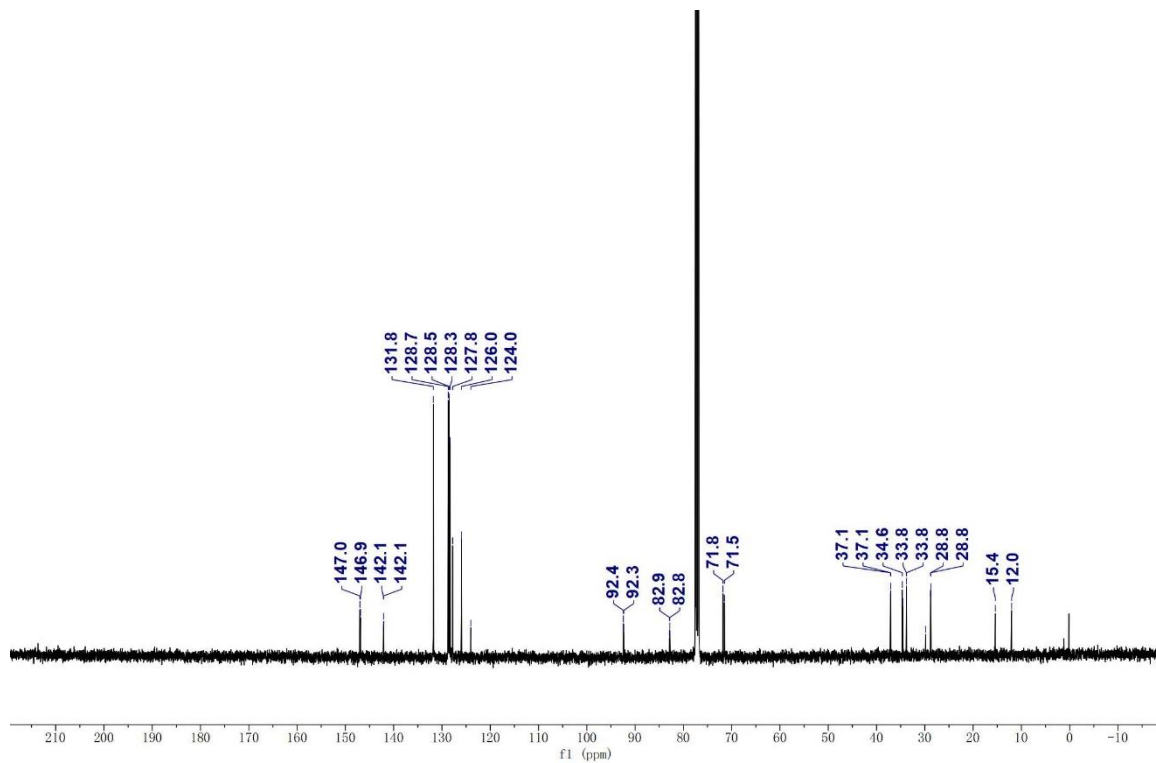

<sup>13</sup>C NMR spectrum of **4b** was measured in CDCl<sub>3</sub> at 101 MHz



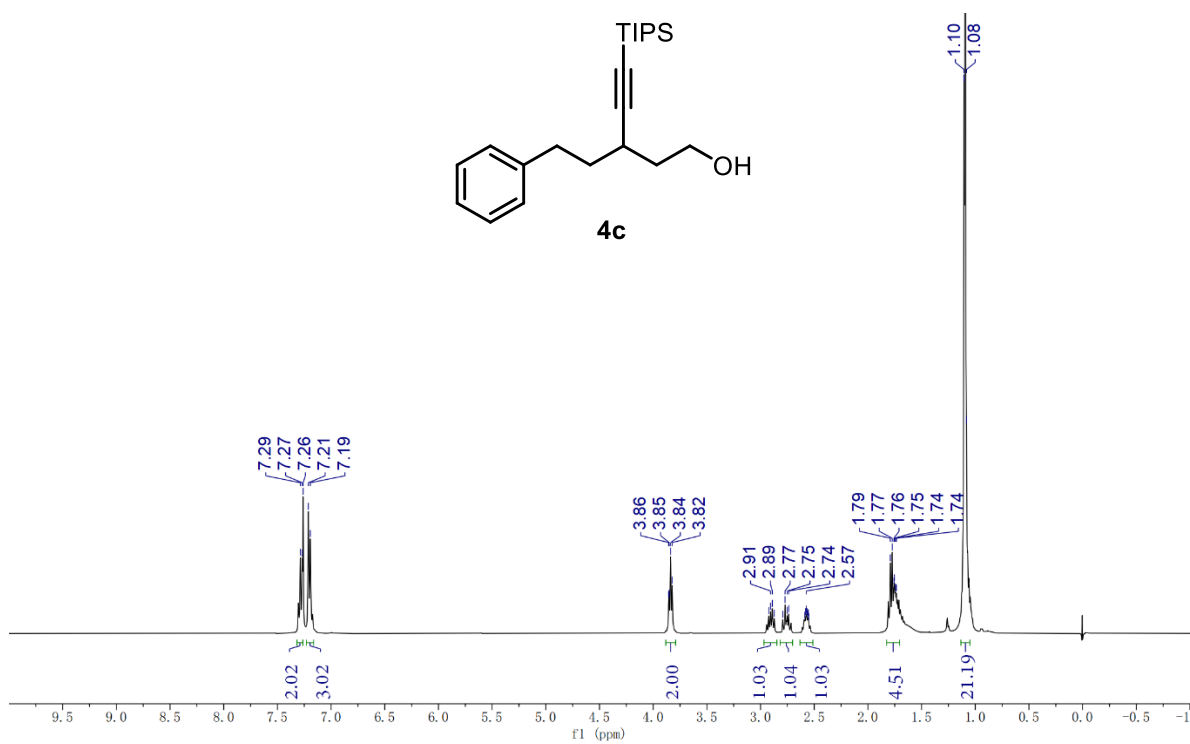

<sup>1</sup>H NMR spectrum of **4c** was measured in CDCl<sub>3</sub> at 400 MHz

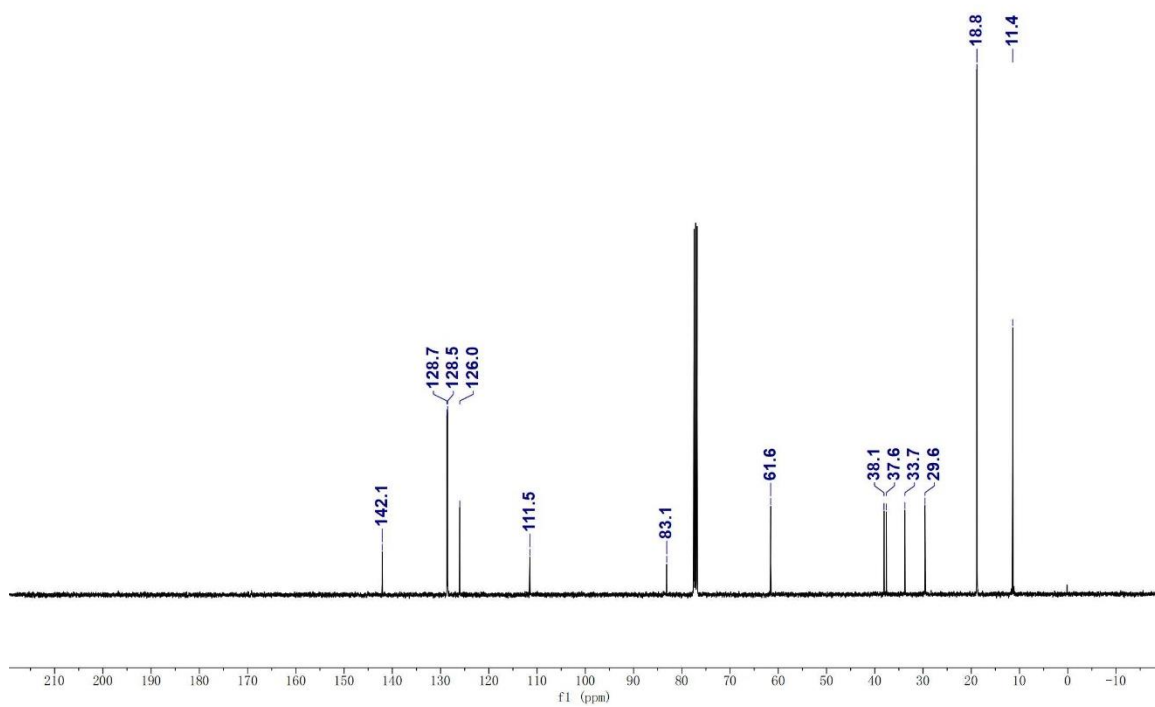

<sup>13</sup>C NMR spectrum of **4c** was measured in CDCl<sub>3</sub> at 101 MHz
